# Supplementary material for: Comprehensive transcriptome analysis based on RNA sequencing identifies critical genes for lipopolysaccharide-induced epididymitis in a rat model
Source: PubMed Central journal article supplement — Asian J Androl. 2019 Apr 30;21(6):605–11. doi: 10.4103/aja.aja_21_19 (PMC6859662; doi:10.4103/aja.aja_21_19), 2019-04-30
Supplement: AJA-21-605_Suppl1.pdf [file AJA-21-605_Suppl1.pdf]

|                 |      |       |       |       |       |       |           |           |           |            |            |            |             |             |
|-----------------|------|-------|-------|-------|-------|-------|-----------|-----------|-----------|------------|------------|------------|-------------|-------------|
| ENSRNOG00000    | 4613 | 6401  | 3252  | 16240 | 20547 | 26429 | 11.176587 | 15.318034 | 7.71161   | 31.817418  | 50.107846  | 65.205903  | 0.000519821 | 2.050958906 |
| ENSRNOG00000    | 641  | 633   | 894   | 5389  | 2277  | 2586  | 4.410097  | 4.235574  | 6.124256  | 27.813804  | 15.891517  | 17.897464  | 0.000807798 | 2.051786441 |
| ENSRNOG00000    | 1881 | 1933  | 1580  | 10639 | 5538  | 8955  | 17.780087 | 17.826017 | 14.923868 | 79.754967  | 53.566475  | 85.891907  | 3.19E-08    | 2.066834163 |
| ENSRNOG00000    | 1634 | 2224  | 1479  | 9488  | 7499  | 8090  | 23.188435 | 30.78429  | 20.963373 | 106.745552 | 108.84787  | 116.443428 | 1.02E-09    | 2.096902737 |
| ENSRNOG00000    | 479  | 490   | 266   | 2110  | 2178  | 1495  | 2.311223  | 2.308232  | 1.281399  | 8.080339   | 10.763387  | 7.326537   | 5.08E-06    | 2.099005599 |
| ENSRNOG00000    | 398  | 323   | 351   | 1579  | 1688  | 1761  | 2.191857  | 1.632475  | 2.090412  | 8.157958   | 9.438969   | 11.186956  | 1.65E-05    | 2.108858369 |
| Rattus_norvegic | 200  | 192   | 141   | 1373  | 530   | 717   | 1.844908  | 1.707951  | 1.293511  | 9.920203   | 4.961248   | 6.632402   | 0.001885728 | 2.114011371 |
| ENSRNOG00000    | 348  | 485   | 585   | 3249  | 1819  | 1839  | 3.489241  | 4.750863  | 5.863953  | 25.874107  | 18.690514  | 18.73484   | 6.46E-07    | 2.114116689 |
| ENSRNOG00000    | 192  | 294   | 265   | 1427  | 729   | 1453  | 2.352245  | 3.522483  | 3.255946  | 13.923533  | 9.172309   | 18.140371  | 0.000248535 | 2.118765508 |
| ENSRNOG00000    | 1327 | 2665  | 893   | 8902  | 7191  | 7361  | 30.917021 | 60.587196 | 20.791128 | 164.491043 | 171.438919 | 174.014343 | 5.50E-10    | 2.13490968  |
| ENSRNOG00000    | 334  | 656   | 325   | 3334  | 1278  | 1956  | 3.597367  | 6.882362  | 3.532098  | 28.925573  | 14.252049  | 21.586003  | 0.000606931 | 2.147064976 |
| ENSRNOG00000    | 713  | 648   | 721   | 4987  | 2123  | 3361  | 8.367102  | 7.723371  | 7.837821  | 46.377617  | 24.770236  | 42.477944  | 1.15E-05    | 2.157624593 |
| ENSRNOG00000    | 610  | 737   | 629   | 4795  | 2189  | 2959  | 7.850157  | 9.310947  | 8.089009  | 48.931107  | 28.811321  | 38.631149  | 1.23E-06    | 2.159902204 |
| ENSRNOG00000    | 719  | 448   | 481   | 2026  | 3048  | 2941  | 1.242061  | 0.848444  | 0.891506  | 2.84072    | 5.503832   | 5.183049   | 7.93E-05    | 2.180056036 |
| ENSRNOG00000    | 1138 | 1274  | 1050  | 9946  | 3871  | 4254  | 8.88487   | 9.85834   | 8.318357  | 63.323565  | 31.729396  | 34.252241  | 0.003546837 | 2.192109577 |
| ENSRNOG00000    | 97   | 193   | 177   | 1015  | 535   | 826   | 1.157261  | 2.207521  | 2.087218  | 9.47617    | 6.565074   | 9.918537   | 0.002211122 | 2.192254293 |
| ENSRNOG00000    | 708  | 750   | 309   | 2965  | 3403  | 2436  | 1.897181  | 2.006989  | 1.13989   | 6.902891   | 11.540222  | 7.517815   | 3.69E-08    | 2.199131173 |
| ENSRNOG00000    | 1166 | 1577  | 678   | 3825  | 7235  | 5661  | 6.299161  | 8.315059  | 3.661778  | 16.397921  | 40.060961  | 31.095779  | 0.00364186  | 2.204531007 |
| ENSRNOG00000    | 117  | 1040  | 0     | 1827  | 1838  | 2059  | 3.310081  | 28.855525 | 0         | 41.207088  | 53.488609  | 59.407433  | 0.000552956 | 2.21357332  |
| ENSRNOG00000    | 459  | 694   | 302   | 3230  | 1993  | 2361  | 4.605537  | 3.848103  | 3.01995   | 25.686491  | 18.107521  | 21.143972  | 7.47E-08    | 2.235456835 |
| ENSRNOG00000    | 125  | 70    | 134   | 669   | 418   | 642   | 0.80259   | 0.441696  | 0.862768  | 3.42586    | 2.765112   | 4.205618   | 0.006306486 | 2.24383313  |
| ENSRNOG00000    | 478  | 182   | 414   | 2750  | 1571  | 1473  | 2.657106  | 1.498993  | 2.777622  | 16.936204  | 8.903436   | 8.146176   | 7.47E-07    | 2.255293065 |
| ENSRNOG00000    | 370  | 470   | 272   | 3276  | 1254  | 1537  | 2.946336  | 3.51548   | 2.017976  | 19.00977   | 10.563115  | 11.617584  | 0.001623553 | 2.26241005  |
| ENSRNOG00000    | 2925 | 3289  | 2477  | 15656 | 13169 | 16921 | 25.073585 | 28.289273 | 21.397461 | 108.887289 | 118.572927 | 151.431754 | 3.25E-10    | 2.269515294 |
| ENSRNOG00000    | 181  | 350   | 224   | 1416  | 1004  | 1566  | 1.455237  | 2.747172  | 1.798327  | 9.032758   | 8.260239   | 12.78227   | 3.87E-05    | 2.271667562 |
| ENSRNOG00000    | 9934 | 13746 | 12688 | 47901 | 66687 | 74506 | 38.843944 | 52.442855 | 49.570169 | 148.507135 | 266.760606 | 295.543216 | 3.69E-05    | 2.277610381 |
| ENSRNOG00000    | 8    | 19    | 12    | 64    | 86    | 55    | 0.061685  | 0.151586  | 0.09521   | 0.424256   | 0.737762   | 0.465297   | 0.007312886 | 2.282875628 |
| ENSRNOG00000    | 2500 | 2654  | 2465  | 21977 | 7401  | 13021 | 21.472092 | 22.242908 | 21.153316 | 149.686722 | 65.036285  | 113.46611  | 0.001309211 | 2.291962294 |
| ENSRNOG00000    | 1222 | 1969  | 1366  | 4556  | 9829  | 9389  | 8.07936   | 12.701934 | 9.028326  | 23.890665  | 66.502113  | 62.993145  | 0.009368805 | 2.304892347 |
| ENSRNOG00000    | 181  | 274   | 177   | 1653  | 595   | 1257  | 0.609942  | 0.795969  | 0.442573  | 4.430433   | 2.117187   | 3.898825   | 0.000613838 | 2.305192922 |
| ENSRNOG00000    | 251  | 538   | 551   | 3270  | 1569  | 2613  | 2.652449  | 5.509016  | 5.071451  | 26.107282  | 14.958216  | 27.965705  | 2.81E-07    | 2.315447157 |
| ENSRNOG00000    | 242  | 372   | 230   | 1575  | 1547  | 1463  | 3.918385  | 6.805218  | 3.883513  | 20.813287  | 26.539203  | 25.186492  | 6.61E-06    | 2.318476484 |
| ENSRNOG00000    | 1223 | 1714  | 1862  | 10158 | 7162  | 9140  | 21.268312 | 29.077702 | 32.350037 | 140.065948 | 127.42408  | 161.260132 | 1.04E-11    | 2.320167183 |
| ENSRNOG00000    | 1063 | 1209  | 1058  | 10210 | 3355  | 5505  | 6.695591  | 7.430914  | 6.656521  | 51.009112  | 21.624981  | 35.186382  | 0.002413616 | 2.328799568 |
| ENSRNOG00000    | 285  | 144   | 129   | 1644  | 752   | 821   | 7.545725  | 3.723335  | 3.402441  | 34.551228  | 20.377916  | 22.062708  | 0.000133764 | 2.346293584 |
| ENSRNOG00000    | 180  | 126   | 45    | 656   | 835   | 455   | 4.328348  | 2.680581  | 1.357401  | 12.215797  | 19.295367  | 11.084458  | 0.002802042 | 2.353314122 |
| Rattus_norvegic | 138  | 109   | 17    | 473   | 409   | 597   | 0.569132  | 0.378979  | 0.075804  | 1.382909   | 1.984236   | 2.896538   | 0.006928228 | 2.373019643 |
| ENSRNOG00000    | 159  | 151   | 126   | 1409  | 571   | 603   | 0.974848  | 0.914651  | 0.77501   | 6.926639   | 3.611334   | 3.783742   | 0.001252457 | 2.376104125 |
| ENSRNOG00000    | 184  | 227   | 26    | 724   | 977   | 755   | 1.336505  | 1.604839  | 0.171375  | 4.093779   | 7.144733   | 5.35107    | 0.000783413 | 2.391873319 |
| ENSRNOG00000    | 1533 | 1425  | 552   | 4770  | 7399  | 7631  | 28.543528 | 25.874229 | 10.252955 | 70.410286  | 140.905991 | 144.112793 | 0.000142616 | 2.405558481 |
| ENSRNOG00000    | 110  | 264   | 155   | 1236  | 662   | 1202  | 1.317297  | 3.13174   | 1.844983  | 11.549402  | 7.964231   | 14.544977  | 0.000132247 | 2.40962984  |
| ENSRNOG00000    | 115  | 75    | 62    | 455   | 358   | 650   | 0.83025   | 0.506661  | 0.439779  | 1.874228   | 1.954519   | 3.522616   | 0.005881832 | 2.417224885 |
| ENSRNOG00000    | 328  | 56    | 15    | 1005  | 787   | 591   | 2.875245  | 0.462343  | 0.12156   | 7.343273   | 7.443828   | 5.420179   | 0.000693157 | 2.428064511 |
| ENSRNOG00000    | 197  | 163   | 192   | 1470  | 1204  | 643   | 1.383758  | 1.117801  | 1.342214  | 8.193637   | 8.656207   | 4.586767   | 6.29E-05    | 2.428110292 |
| ENSRNOG00000    | 4    | 27    | 5     | 83    | 63    | 67    | 0.070082  | 0.561158  | 0.072466  | 1.446151   | 1.775185   | 1.283226   | 0.003530435 | 2.441267545 |
| ENSRNOG00000    | 254  | 367   | 547   | 3082  | 1149  | 2884  | 4.303595  | 5.410292  | 3.749291  | 40.673605  | 23.560721  | 19.692218  | 0.001503721 | 2.44270849  |
| Rattus_norvegic | 158  | 581   | 77    | 2211  | 1243  | 1458  | 1.227658  | 4.222978  | 0.573357  | 13.782409  | 10.560707  | 12.550405  | 1.03E-06    | 2.446892128 |
| ENSRNOG00000    | 219  | 4     | 5823  | 11313 | 12040 | 13281 | 1.844066  | 0.025383  | 40.732642 | 62.584642  | 103.68984  | 94.160078  | 8.95E-05    | 2.452213737 |
| ENSRNOG00000    | 1505 | 2187  | 1000  | 11522 | 7197  | 9814  | 4.06472   | 5.894886  | 3.007875  | 26.90578   | 19.5717    | 28.507659  | 5.72E-13    | 2.463651333 |
| ENSRNOG00000    | 247  | 61    | 227   | 868   | 1128  | 1210  | 1.493934  | 0.956178  | 1.473577  | 5.009617   | 7.657989   | 7.815854   | 6.46E-05    | 2.466328667 |









|                 |      |     |      |        |        |        |           |          |           |             |             |             |             |             |
|-----------------|------|-----|------|--------|--------|--------|-----------|----------|-----------|-------------|-------------|-------------|-------------|-------------|
| ENSRNOG00000    | 5    | 13  | 360  | 9683   | 39674  | 12751  | 0.37451   | 1.026459 | 29.629129 | 633.647827  | 3349.998291 | 1067.592773 | 0.003257945 | 7.26649806  |
| Rattus_norvegic | 0    | 3   | 3    | 102    | 566    | 400    | 0         | 0.004977 | 0.005097  | 0.42642     | 2.796979    | 1.459089    | 0.000219017 | 7.424195424 |
| ENSRNOG00000    | 8    | 2   | 499  | 16697  | 59418  | 18911  | 0.270214  | 0.040555 | 21.294788 | 833.591796  | 3154.1474   | 795.265564  | 0.001534656 | 7.443067092 |
| Rattus_norvegic | 7    | 13  | 0    | 1832   | 273    | 2386   | 0.049251  | 0.095678 | 0         | 11.850455   | 2.275322    | 19.748087   | 0.000350803 | 7.676074197 |
| ENSRNOG00000    | 3    | 0   | 0    | 344    | 56     | 324    | 0.040414  | 0        | 0         | 5.464584    | 1.134922    | 6.58559     | 3.31E-05    | 7.737997888 |
| ENSRNOG00000    | 40   | 10  | 28   | 2876   | 7260   | 7879   | 0.276068  | 0.065599 | 0.191521  | 18.324265   | 59.88608    | 64.573253   | 7.28E-09    | 7.770008049 |
| ENSRNOG00000    | 70   | 7   | 12   | 1798   | 8357   | 13651  | 0.551485  | 0.046221 | 0.090175  | 13.436462   | 78.773556   | 109.576016  | 0.000283057 | 8.008538006 |
| Rattus_norvegic | 184  | 263 | 81   | 20280  | 48180  | 84391  | 3.664577  | 3.808115 | 1.60503   | 317.764638  | 652.382515  | 1199.936104 | 1.28E-05    | 8.11952619  |
| ENSRNOG00000    | 168  | 220 | 74   | 8909   | 83973  | 60254  | 0.521935  | 0.796349 | 0.169546  | 30.140135   | 729.391278  | 215.048051  | 0.000197706 | 8.340541696 |
| ENSRNOG00000    | 2041 | 123 | 3148 | 242677 | 884656 | 744855 | 32.120611 | 1.676792 | 44.999465 | 2654.205002 | 11823.73758 | 10129.24492 | 1.80E-07    | 8.380051988 |
| ENSRNOG00000    | 3    | 0   | 89   | 3445   | 17805  | 15734  | 0.00452   | 0        | 0.369157  | 4.701025    | 53.060816   | 84.453898   | 4.20E-06    | 8.569356385 |
| ENSRNOG00000    | 62   | 113 | 53   | 12820  | 37996  | 49324  | 1.067978  | 1.97286  | 0.812985  | 107.652781  | 414.379501  | 529.454828  | 1.63E-07    | 8.721582205 |
| ENSRNOG00000    | 11   | 13  | 60   | 5947   | 23399  | 28641  | 0.394176  | 0.47525  | 1.983157  | 163.682056  | 854.229408  | 751.979626  | 4.23E-07    | 9.356892558 |
| ENSRNOG00000    | 17   | 13  | 137  | 13181  | 47155  | 56852  | 0.508206  | 0.36552  | 4.109277  | 315.027671  | 1452.940322 | 1737.692723 | 1.17E-07    | 9.372262641 |
| ENSRNOG00000    | 19   | 17  | 0    | 4795   | 13158  | 8559   | 0.033105  | 0.027598 | 0         | 8.282368    | 24.154721   | 16.736477   | 4.02E-10    | 9.460934782 |
| ENSRNOG00000    | 53   | 8   | 156  | 18765  | 63746  | 79961  | 2.983239  | 0.417883 | 8.817779  | 846.907043  | 3712.136475 | 4617.420898 | 8.83E-08    | 9.466055863 |
| ENSRNOG00000    | 22   | 12  | 101  | 12106  | 29992  | 59844  | 0.630891  | 0.310889 | 2.898379  | 277.172119  | 885.980896  | 1753.076538 | 1.41E-05    | 9.47591776  |
| ENSRNOG00000    | 0    | 0   | 38   | 3339   | 15462  | 11507  | 0         | 0        | 0.471117  | 30.690488   | 182.941902  | 135.032951  | 4.04E-07    | 9.552881566 |
| ENSRNOG00000    | 6    | 0   | 55   | 7009   | 32638  | 14689  | 0.042988  | 0        | 0.246667  | 34.91108    | 212.561903  | 92.145477   | 2.92E-05    | 9.71194146  |
| ENSRNOG00000    | 102  | 123 | 132  | 32459  | 119676 | 176969 | 3.083043  | 3.626158 | 4.000711  | 783.116394  | 3725.435059 | 5462.855469 | 1.31E-06    | 9.790110775 |
| ENSRNOG00000    | 3    | 5   | 9    | 2377   | 5310   | 9103   | 0.005338  | 0.010416 | 0.049639  | 11.111616   | 32.41634    | 55.305634   | 1.53E-07    | 9.870217912 |
| ENSRNOG00000    | 3    | 3   | 38   | 7343   | 22812  | 19169  | 0.060164  | 0.0587   | 1.108316  | 191.463035  | 775.824348  | 607.589523  | 1.21E-10    | 10.03787142 |
| ENSRNOG00000    | 11   | 3   | 6    | 4410   | 11305  | 11884  | 0.81137   | 0.204417 | 0.416677  | 262.35379   | 867.79364   | 904.577454  | 1.48E-12    | 10.35137978 |
| ENSRNOG00000    | 38   | 5   | 6    | 15643  | 71135  | 89429  | 0.842991  | 0.019026 | 0.025168  | 300.607903  | 1768.581236 | 2207.102364 | 2.03E-08    | 11.75619802 |
| ENSRNOG00000    | 0    | 0   | 0    | 636    | 747    | 2566   | 0         | 0        | 0         | 5.532573    | 8.315377    | 28.414396   | 3.70E-05    | Inf         |
| ENSRNOG00000    | 0    | 0   | 0    | 556    | 1867   | 642    | 0         | 0        | 0         | 5.158522    | 44.504165   | 6.384229    | 5.67E-06    | Inf         |
| Rattus_norvegic | 0    | 0   | 0    | 132    | 241    | 354    | 0         | 0        | 0         | 1.209255    | 2.369971    | 4.043151    | 3.55E-09    | Inf         |
| Rattus_norvegic | 0    | 0   | 0    | 571    | 101    | 244    | 0         | 0        | 0         | 4.364323    | 0.991929    | 2.383926    | 2.07E-06    | Inf         |
| Rattus_norvegic | 0    | 0   | 0    | 506    | 1125   | 1551   | 0         | 0        | 0         | 8.456599    | 23.968661   | 33.244132   | 4.71E-11    | Inf         |
| Rattus_norvegic | 0    | 0   | 0    | 4431   | 1034   | 4438   | 0         | 0        | 0         | 114.084625  | 34.320225   | 146.203186  | 2.61E-12    | Inf         |
| Rattus_norvegic | 0    | 0   | 0    | 619    | 189    | 1582   | 0         | 0        | 0         | 1.158102    | 0.46437     | 4.383565    | 0.000463372 | Inf         |
| Rattus_norvegic | 0    | 0   | 0    | 143    | 58     | 60     | 0         | 0        | 0         | 0.972046    | 0.508343    | 0.51775     | 2.36E-10    | Inf         |

### Downregulated genes

| #ID             | T1_Count | T2_Count | T3_Count | T4_Count | T5_Count | T6_Count | T1_FPKM     | T2_FPKM     | T3_FPKM     | T4_FPKM  | T5_FPKM  | T6_FPKM  | FDR         | log2FC       |
|-----------------|----------|----------|----------|----------|----------|----------|-------------|-------------|-------------|----------|----------|----------|-------------|--------------|
| ENSRNOG00000    | 2109     | 777      | 4809     | 0        | 3        | 0        | 132.214052  | 47.405385   | 302.637593  | 0        | 0.127508 | 0        | 1.39E-05    | -11.35537593 |
| ENSRNOG00000    | 147137   | 66176    | 117563   | 103      | 75       | 25       | 2585.466755 | 1130.188811 | 2066.687728 | 1.678518 | 1.339144 | 0.369678 | 1.30E-25    | -10.85224929 |
| Rattus_norvegic | 13201    | 5143     | 26806    | 18       | 15       | 5        | 37.748849   | 16.858225   | 77.560527   | 0.105893 | 0.135073 | 0.004903 | 2.68E-06    | -10.39471125 |
| ENSRNOG00000    | 11447    | 5897     | 26247    | 17       | 21       | 2        | 458.10556   | 230.268555  | 1049.59082  | 0.508962 | 0.855364 | 0.05549  | 3.03E-06    | -10.251452   |
| ENSRNOG00000    | 944      | 575      | 1103     | 3        | 0        | 0        | 3.222992    | 1.92224     | 3.765905    | 0.005455 | 0        | 0        | 6.84E-25    | -10.12335259 |
| ENSRNOG00000    | 1851     | 1587     | 1827     | 0        | 0        | 7        | 26.150477   | 21.860424   | 25.788983   | 0        | 0        | 0.086518 | 1.10E-45    | -9.595680552 |
| Rattus_norvegic | 278      | 411      | 436      | 2        | 0        | 0        | 1.113924    | 1.801825    | 1.753932    | 0.00468  | 0        | 0        | 5.45E-14    | -9.481699933 |
| Rattus_norvegic | 423      | 1092     | 607      | 5        | 0        | 0        | 0.856761    | 2.216356    | 1.201096    | 0.00623  | 0        | 0        | 9.89E-12    | -9.06737597  |
| Rattus_norvegic | 993      | 747      | 2011     | 3        | 5        | 0        | 5.014493    | 3.69893     | 10.171156   | 0.008386 | 0.020085 | 0        | 5.23E-09    | -9.013304795 |
| Rattus_norvegic | 196      | 47       | 484      | 2        | 0        | 0        | 1.04092     | 0.248401    | 2.597698    | 0.006951 | 0        | 0        | 0.004402408 | -8.869578671 |
| Rattus_norvegic | 318      | 152      | 473      | 3        | 0        | 0        | 2.934328    | 1.335209    | 4.220651    | 0.01303  | 0        | 0        | 2.19E-08    | -8.652194349 |
| ENSRNOG00000    | 560      | 537      | 1003     | 7        | 0        | 0        | 37.344299   | 34.901894   | 66.79744    | 0.36394  | 0        | 0        | 2.56E-15    | -8.581004751 |
| ENSRNOG00000    | 1835     | 1193     | 3521     | 4        | 9        | 6        | 7.158965    | 4.544429    | 14.176974   | 0.010178 | 0.027106 | 0.021299 | 2.60E-08    | -8.526324557 |
| ENSRNOG00000    | 2915     | 2730     | 4704     | 26       | 4        | 5        | 49.982109   | 45.52028    | 80.246591   | 0.317109 | 0.061913 | 0.065898 | 5.49E-23    | -8.470739959 |
| Rattus_norvegic | 244      | 146      | 438      | 3        | 0        | 0        | 1.253914    | 0.733911    | 2.255226    | 0.008233 | 0        | 0        | 2.19E-07    | -8.464802661 |
| Rattus_norvegic | 209      | 92       | 475      | 3        | 0        | 0        | 1.555335    | 0.848211    | 4.236033    | 0.011116 | 0        | 0        | 0.000491602 | -8.375444216 |
| ENSRNOG00000    | 239      | 227      | 813      | 0        | 0        | 4        | 4.663051    | 3.827697    | 15.484515   | 0        | 0        | 0.076452 | 0.000492504 | -8.373711506 |
| Rattus_norvegic | 1282     | 456      | 1050     | 3        | 7        | 0        | 3.368416    | 1.428115    | 3.277685    | 0.00605  | 0.007849 | 0        | 2.33E-11    | -8.236360235 |
| Rattus_norvegic | 3205     | 2781     | 4990     | 25       | 11       | 9        | 10.23875    | 9.011506    | 15.943073   | 0.04832  | 0.024431 | 0.024553 | 1.31E-21    | -8.130909008 |
| Rattus_norvegic | 914      | 794      | 819      | 5        | 3        | 3        | 15.390074   | 13.776386   | 14.131271   | 0.039894 | 0.014875 | 0.112919 | 1.14E-20    | -8.007355431 |
| ENSRNOG00000    | 1820     | 1978     | 4256     | 24       | 0        | 14       | 7.737215    | 8.204078    | 18.082497   | 0.080457 | 0        | 0.060155 | 8.35E-09    | -7.960965481 |
| ENSRNOG00000    | 52272    | 44936    | 55140    | 452      | 190      | 94       | 444.961732  | 370.083442  | 474.690257  | 2.911504 | 1.134046 | 0.67497  | 2.46E-47    | -7.907921766 |
| ENSRNOG00000    | 12671    | 10328    | 15076    | 68       | 63       | 53       | 73.243338   | 58.768449   | 87.062566   | 0.278446 | 0.379102 | 0.31411  | 1.32E-57    | -7.832832896 |
| Rattus_norvegic | 874      | 1903     | 870      | 5        | 3        | 10       | 1.687093    | 2.850227    | 1.334685    | 0.005001 | 0.003163 | 0.015348 | 9.17E-11    | -7.767269393 |
| Rattus_norvegic | 8008     | 5549     | 7983     | 84       | 28       | 7        | 26.608576   | 17.98764    | 26.502825   | 0.22103  | 0.091881 | 0.023142 | 1.62E-52    | -7.745372765 |
| ENSRNOG00000    | 1498     | 1093     | 1943     | 15       | 0        | 10       | 5.528818    | 3.387019    | 7.252953    | 0.025843 | 0        | 0.021346 | 6.84E-25    | -7.723660648 |
| ENSRNOG00000    | 3764     | 2254     | 5931     | 84       | 3        | 0        | 58.659241   | 34.273556   | 92.36496    | 1.036959 | 0.032103 | 0        | 1.62E-09    | -7.443865945 |
| Rattus_norvegic | 3137     | 2583     | 3221     | 3        | 17       | 34       | 8.045712    | 5.561591    | 7.748486    | 0.001537 | 0.01587  | 0.032431 | 5.21E-53    | -7.420488513 |
| Rattus_norvegic | 229      | 172      | 248      | 5        | 0        | 0        | 3.018594    | 2.42479     | 3.137686    | 0.045832 | 0        | 0        | 7.56E-10    | -7.369401295 |
| ENSRNOG00000    | 2476     | 3461     | 3327     | 17       | 29       | 17       | 58.583481   | 79.888181   | 78.643085   | 0.308101 | 0.697593 | 0.395049 | 9.27E-53    | -7.303299049 |
| ENSRNOG00000    | 4255     | 2496     | 7468     | 40       | 15       | 46       | 12.155286   | 6.572117    | 18.74995    | 0.04652  | 0.016226 | 0.123306 | 1.97E-07    | -7.296945212 |
| ENSRNOG00000    | 21720    | 11927    | 25080    | 269      | 92       | 84       | 156.089462  | 84.630743   | 181.95923   | 1.563541 | 0.87209  | 0.761736 | 1.54E-16    | -7.261891572 |
| Rattus_norvegic | 463      | 413      | 739      | 0        | 8        | 3        | 1.642656    | 1.447565    | 3.029047    | 0        | 0.026239 | 0.0068   | 4.20E-14    | -7.225380156 |
| Rattus_norvegic | 111      | 227      | 161      | 3        | 1        | 0        | 0.470881    | 0.941338    | 0.681539    | 0.006795 | 0.004267 | 0        | 1.01E-09    | -7.213964917 |
| ENSRNOG00000    | 8389     | 10222    | 7133     | 175      | 36       | 0        | 122.795744  | 145.456993  | 103.158046  | 1.969834 | 0.490156 | 0        | 9.93E-69    | -7.210637353 |
| ENSRNOG00000    | 994      | 853      | 1900     | 28       | 4        | 0        | 3.909641    | 3.277757    | 6.93286     | 0.245375 | 0.052066 | 0        | 2.91E-09    | -7.1797207   |
| Rattus_norvegic | 345      | 347      | 439      | 0        | 3        | 5        | 1.598545    | 1.633503    | 2.012461    | 0        | 0.007779 | 0.019824 | 1.17E-11    | -7.175885104 |
| Rattus_norvegic | 58       | 46       | 171      | 0        | 0        | 2        | 2.43049     | 1.826226    | 6.520239    | 0        | 0        | 0.062082 | 0.002114541 | -7.156166702 |
| ENSRNOG00000    | 2835     | 2807     | 4403     | 5        | 28       | 41       | 6.609766    | 6.38519     | 10.256744   | 0.007444 | 0.063568 | 0.094951 | 1.45E-25    | -7.138103658 |
| Rattus_norvegic | 3467     | 5413     | 3420     | 61       | 12       | 39       | 6.660566    | 10.512312   | 7.489252    | 0.061698 | 0.018631 | 0.060879 | 6.88E-32    | -6.968937023 |
| ENSRNOG00000    | 3657     | 3801     | 2428     | 44       | 28       | 19       | 133.423322  | 142.179719  | 91.816021   | 1.082664 | 0.901896 | 0.699382 | 1.15E-45    | -6.930182547 |
| Rattus_norvegic | 562      | 734      | 601      | 0        | 16       | 0        | 1.173883    | 1.474268    | 1.233394    | 0        | 0.031104 | 0        | 7.79E-15    | -6.902009954 |
| Rattus_norvegic | 196      | 202      | 593      | 0        | 9        | 0        | 0.707414    | 0.711967    | 2.139504    | 0        | 0.029788 | 0        | 0.000382801 | -6.809254302 |
| Rattus_norvegic | 421      | 357      | 354      | 7        | 0        | 5        | 3.396447    | 2.778354    | 2.815736    | 0.037873 | 0        | 0.032304 | 1.08E-10    | -6.769754975 |
| Rattus_norvegic | 67       | 109      | 345      | 0        | 0        | 5        | 0.283469    | 0.425387    | 1.449082    | 0        | 0        | 0.014391 | 0.009861659 | -6.755773822 |
| Rattus_norvegic | 111      | 160      | 152      | 5        | 0        | 0        | 1.391049    | 1.766046    | 1.85019     | 0.033768 | 0        | 0        | 3.64E-09    | -6.747360545 |
| Rattus_norvegic | 425      | 552      | 601      | 15       | 0        | 3        | 4.065209    | 5.042435    | 5.768236    | 0.093349 | 0        | 0.016838 | 2.18E-12    | -6.74452317  |
| Rattus_norvegic | 347      | 535      | 570      | 11       | 2        | 3        | 1.866459    | 2.809649    | 3.067741    | 0.042957 | 0.009219 | 0.011007 | 6.19E-12    | -6.7434274   |
| ENSRNOG00000    | 3436     | 2760     | 7038     | 80       | 27       | 38       | 37.892239   | 29.702833   | 77.568848   | 0.696769 | 0.29413  | 0.420841 | 7.06E-07    | -6.716808201 |
| Rattus_norvegic | 2025     | 1841     | 3062     | 64       | 6        | 11       | 6.600775    | 5.192138    | 10.883869   | 0.117372 | 0.021164 | 0.013765 | 1.13E-20    | -6.697200929 |































|                 |      |      |      |      |      |      |           |           |           |           |           |          |             |              |
|-----------------|------|------|------|------|------|------|-----------|-----------|-----------|-----------|-----------|----------|-------------|--------------|
| ENSRNOG00000    | 4278 | 4839 | 5484 | 3437 | 2352 | 2158 | 31.090473 | 34.308125 | 39.822414 | 19.801575 | 17.479969 | 15.90445 | 0.008441064 | -1.034750585 |
| ENSRNOG00000    | 5480 | 5240 | 5317 | 3976 | 2426 | 2364 | 11.443824 | 10.692478 | 12.121721 | 6.426629  | 5.198149  | 4.971134 | 0.008605589 | -1.034366635 |
| ENSRNOG00000    | 506  | 94   | 330  | 0    | 0    | 0    | 1.23606   | 0.2234    | 1.221553  | 0         | 0         | 0        | 1.16E-06    | #NAME?       |
| ENSRNOG00000    | 216  | 139  | 85   | 0    | 0    | 0    | 1.950241  | 1.303703  | 0.725863  | 0         | 0         | 0        | 4.31E-11    | #NAME?       |
| ENSRNOG00000    | 349  | 219  | 444  | 0    | 0    | 0    | 1.880094  | 1.158119  | 2.451202  | 0         | 0         | 0        | 8.18E-15    | #NAME?       |
| ENSRNOG00000    | 117  | 50   | 298  | 0    | 0    | 0    | 5.219775  | 2.168518  | 13.360778 | 0         | 0         | 0        | 0.000589176 | #NAME?       |
| ENSRNOG00000    | 325  | 152  | 916  | 0    | 0    | 0    | 5.9726    | 2.600406  | 16.055367 | 0         | 0         | 0        | 0.000180666 | #NAME?       |
| ENSRNOG00000    | 367  | 249  | 975  | 0    | 0    | 0    | 1.967283  | 1.479253  | 3.509637  | 0         | 0         | 0        | 5.63E-06    | #NAME?       |
| Rattus_norvegic | 71   | 68   | 51   | 0    | 0    | 0    | 1.198605  | 1.124406  | 0.863091  | 0         | 0         | 0        | 1.65E-13    | #NAME?       |
| Rattus_norvegic | 67   | 67   | 47   | 0    | 0    | 0    | 0.592613  | 0.573118  | 0.518782  | 0         | 0         | 0        | 1.13E-13    | #NAME?       |
| Rattus_norvegic | 127  | 95   | 352  | 0    | 0    | 0    | 2.25445   | 1.627966  | 6.18475   | 0         | 0         | 0        | 5.43E-05    | #NAME?       |
| Rattus_norvegic | 100  | 61   | 153  | 0    | 0    | 0    | 0.428758  | 0.252533  | 0.653164  | 0         | 0         | 0        | 9.99E-10    | #NAME?       |
| Rattus_norvegic | 148  | 86   | 320  | 0    | 0    | 0    | 0.389138  | 0.221063  | 0.842297  | 0         | 0         | 0        | 6.23E-06    | #NAME?       |
| Rattus_norvegic | 124  | 94   | 183  | 0    | 0    | 0    | 1.290546  | 0.950055  | 1.906516  | 0         | 0         | 0        | 3.98E-12    | #NAME?       |
| Rattus_norvegic | 274  | 154  | 374  | 0    | 0    | 0    | 0.779287  | 0.886851  | 1.202286  | 0         | 0         | 0        | 1.72E-13    | #NAME?       |
| Rattus_norvegic | 345  | 462  | 944  | 0    | 0    | 0    | 2.625406  | 3.822499  | 7.172734  | 0         | 0         | 0        | 4.39E-10    | #NAME?       |
| Rattus_norvegic | 357  | 400  | 653  | 0    | 0    | 0    | 1.241033  | 1.356783  | 2.269935  | 0         | 0         | 0        | 1.19E-17    | #NAME?       |
| Rattus_norvegic | 123  | 178  | 111  | 0    | 0    | 0    | 1.656967  | 2.356056  | 1.504734  | 0         | 0         | 0        | 3.76E-12    | #NAME?       |
| Rattus_norvegic | 436  | 469  | 372  | 0    | 0    | 0    | 2.310112  | 2.442401  | 1.768886  | 0         | 0         | 0        | 1.22E-16    | #NAME?       |
| Rattus_norvegic | 445  | 394  | 629  | 0    | 0    | 0    | 2.387622  | 2.059378  | 3.369118  | 0         | 0         | 0        | 4.13E-18    | #NAME?       |
| Rattus_norvegic | 233  | 91   | 194  | 0    | 0    | 0    | 3.527559  | 1.304737  | 2.30077   | 0         | 0         | 0        | 3.93E-12    | #NAME?       |
| Rattus_norvegic | 46   | 59   | 136  | 0    | 0    | 0    | 1.605628  | 1.915176  | 4.48243   | 0         | 0         | 0        | 1.37E-05    | #NAME?       |
| Rattus_norvegic | 477  | 294  | 948  | 0    | 0    | 0    | 7.387876  | 4.44188   | 14.691929 | 0         | 0         | 0        | 8.23E-09    | #NAME?       |
| Rattus_norvegic | 286  | 81   | 269  | 0    | 0    | 0    | 4.995712  | 1.423072  | 4.667539  | 0         | 0         | 0        | 1.01E-08    | #NAME?       |
| Rattus_norvegic | 156  | 69   | 392  | 0    | 0    | 0    | 1.576578  | 0.678476  | 3.964894  | 0         | 0         | 0        | 0.000272716 | #NAME?       |
| Rattus_norvegic | 187  | 234  | 1422 | 0    | 0    | 0    | 1.126409  | 1.422884  | 9.187018  | 0         | 0         | 0        | 0.006185627 | #NAME?       |
| Rattus_norvegic | 130  | 76   | 384  | 0    | 0    | 0    | 0.292924  | 0.16676   | 0.865962  | 0         | 0         | 0        | 0.000468495 | #NAME?       |
| Rattus_norvegic | 248  | 216  | 888  | 0    | 0    | 0    | 1.488335  | 1.93751   | 7.404181  | 0         | 0         | 0        | 0.000127326 | #NAME?       |
| Rattus_norvegic | 50   | 49   | 164  | 0    | 0    | 0    | 1.003612  | 1.003543  | 3.416845  | 0         | 0         | 0        | 0.000467316 | #NAME?       |
| Rattus_norvegic | 111  | 62   | 232  | 0    | 0    | 0    | 1.802523  | 0.972802  | 3.778578  | 0         | 0         | 0        | 1.15E-05    | #NAME?       |
| Rattus_norvegic | 679  | 518  | 1456 | 0    | 0    | 0    | 1.820213  | 1.508877  | 3.514271  | 0         | 0         | 0        | 4.39E-10    | #NAME?       |
| Rattus_norvegic | 2419 | 1096 | 3190 | 0    | 0    | 0    | 2.569916  | 1.14353   | 3.114773  | 0         | 0         | 0        | 3.88E-16    | #NAME?       |













































































































































































































































































































































































































































































































































|                  |      |      |      |      |      |      |           |            |           |           |           |           |             |              |
|------------------|------|------|------|------|------|------|-----------|------------|-----------|-----------|-----------|-----------|-------------|--------------|
| Rattus_norvegici | 38   | 47   | 56   | 40   | 51   | 31   | 0.50019   | 0.604258   | 0.738055  | 0.414484  | 0.693077  | 0.412912  | 0.85163186  | -0.332338942 |
| Rattus_norvegici | 108  | 39   | 57   | 72   | 62   | 87   | 1.3137    | 0.616349   | 1.035812  | 0.798026  | 1.170657  | 1.639085  | 0.996432841 | -0.012655571 |
| Rattus_norvegici | 242  | 166  | 87   | 357  | 149  | 287  | 1.177691  | 0.818153   | 0.432241  | 1.392629  | 0.752407  | 1.416423  | 0.754770199 | 0.520138611  |
| Rattus_norvegici | 118  | 71   | 148  | 79   | 103  | 184  | 4.10642   | 2.120005   | 4.882734  | 2.338192  | 3.558873  | 6.156289  | 0.997360121 | 0.019104192  |
| Rattus_norvegici | 811  | 709  | 517  | 108  | 506  | 235  | 5.70749   | 5.227803   | 5.680143  | 0.962399  | 6.323315  | 3.216712  | 0.072750048 | -1.319750743 |
| Rattus_norvegici | 78   | 114  | 53   | 153  | 102  | 85   | 4.245174  | 5.252574   | 2.484869  | 6.201071  | 6.233187  | 4.539943  | 0.881405528 | 0.319408462  |
| Rattus_norvegici | 236  | 314  | 325  | 618  | 142  | 182  | 0.953617  | 1.696308   | 2.06231   | 1.446834  | 0.582402  | 0.596519  | 0.988913986 | -0.122244466 |
| Rattus_norvegici | 47   | 87   | 59   | 64   | 50   | 54   | 0.278511  | 0.501306   | 0.347134  | 0.299013  | 0.304287  | 0.322235  | 0.868219444 | -0.335930671 |
| Rattus_norvegici | 29   | 67   | 46   | 15   | 194  | 371  | 0.397502  | 0.919631   | 0.649501  | 0.158811  | 2.806505  | 5.320673  | 0.451956277 | 1.996943935  |
| Rattus_norvegici | 56   | 49   | 57   | 34   | 22   | 22   | 1.25449   | 1.060018   | 1.260907  | 0.590144  | 0.500032  | 0.493103  | 0.247509948 | -1.213340508 |
| Rattus_norvegici | 0    | 277  | 383  | 549  | 448  | 549  | 0         | 0.995024   | 1.406985  | 1.601311  | 1.687961  | 2.051165  | 0.28257709  | 1.091023182  |
| Rattus_norvegici | 59   | 60   | 56   | 73   | 22   | 42   | 4.427075  | 4.363655   | 4.183876  | 4.338818  | 1.637816  | 3.215286  | 0.770394071 | -0.542483278 |
| Rattus_norvegici | 66   | 15   | 20   | 8    | 152  | 101  | 1.701765  | 0.366677   | 0.514518  | 0.160365  | 4.03862   | 2.656829  | 0.617281334 | 1.333723656  |
| Rattus_norvegici | 187  | 55   | 135  | 88   | 29   | 28   | 0.637662  | 0.182517   | 0.460975  | 0.236176  | 0.100347  | 0.09611   | 0.200533071 | -1.597316483 |
| Rattus_norvegici | 3819 | 5580 | 1312 | 2513 | 696  | 1003 | 95.287506 | 135.825012 | 32.695717 | 49.698021 | 17.748512 | 25.366812 | 0.254940172 | -1.543810446 |
| Rattus_norvegici | 58   | 60   | 52   | 110  | 7    | 29   | 0.674352  | 0.679754   | 0.494355  | 0.736491  | 0.052239  | 0.233181  | 0.865731557 | -0.480585063 |
| Rattus_norvegici | 94   | 136  | 10   | 365  | 110  | 122  | 2.300775  | 3.15709    | 0.234889  | 7.215721  | 2.677578  | 2.924597  | 0.438380874 | 1.117159442  |
| Rattus_norvegici | 72   | 90   | 80   | 173  | 180  | 169  | 1.543407  | 1.899573   | 1.715165  | 2.964237  | 3.979556  | 3.700122  | 0.50688374  | 0.985701356  |
| Rattus_norvegici | 749  | 614  | 611  | 502  | 289  | 541  | 5.073185  | 3.377042   | 4.303823  | 1.725867  | 1.339007  | 3.538473  | 0.466217212 | -0.709130818 |
| Rattus_norvegici | 153  | 58   | 169  | 34   | 51   | 33   | 0.812847  | 0.299182   | 0.89319   | 0.140903  | 0.275276  | 0.173593  | 0.09963693  | -1.806244004 |
| Rattus_norvegici | 167  | 104  | 538  | 45   | 28   | 359  | 1.346653  | 0.723839   | 4.778108  | 0.258482  | 0.214835  | 3.43133   | 0.742472709 | -0.987862153 |
| Rattus_norvegici | 165  | 122  | 184  | 27   | 118  | 43   | 4.1491    | 3.001412   | 4.637137  | 0.524523  | 3.046114  | 1.082419  | 0.233763041 | -1.392728799 |
| Rattus_norvegici | 82   | 49   | 79   | 14   | 34   | 33   | 1.922316  | 1.125894   | 1.845683  | 0.251413  | 0.815079  | 0.78943   | 0.142536411 | -1.456107843 |
| Rattus_norvegici | 27   | 33   | 53   | 69   | 204  | 555  | 0.088524  | 0.107976   | 0.176458  | 0.18292   | 0.703672  | 1.901655  | 0.291251547 | 2.811837179  |
| Rattus_norvegici | 149  | 233  | 87   | 583  | 332  | 350  | 3.913744  | 5.996906   | 2.279078  | 12.254426 | 9.00547   | 9.394409  | 0.225091422 | 1.27578327   |
| Rattus_norvegici | 70   | 90   | 55   | 105  | 76   | 71   | 1.767454  | 1.943698   | 1.358067  | 2.332102  | 2.084166  | 1.950991  | 0.976915757 | 0.083068908  |
| Rattus_norvegici | 196  | 169  | 633  | 8    | 0    | 24   | 1.112582  | 0.878416   | 4.373029  | 0.04543   | 0         | 0.147911  | 0.018228194 | -5.086726793 |
| Rattus_norvegici | 71   | 40   | 102  | 48   | 82   | 70   | 0.631314  | 0.348943   | 0.904364  | 0.338796  | 0.749737  | 0.634351  | 0.925560653 | -0.196319505 |
| Rattus_norvegici | 235  | 221  | 410  | 203  | 120  | 73   | 1.149779  | 1.1528     | 1.901218  | 0.757728  | 0.520133  | 0.610165  | 0.279403931 | -1.31528463  |
| Rattus_norvegici | 202  | 281  | 232  | 338  | 226  | 249  | 2.687691  | 2.397187   | 1.719963  | 1.825397  | 2.101997  | 2.312989  | 0.988641145 | 0.036170616  |
| Rattus_norvegici | 63   | 131  | 75   | 188  | 122  | 173  | 0.624538  | 1.028059   | 0.713133  | 1.624574  | 1.001711  | 2.202813  | 0.671968047 | 0.706954197  |
| Rattus_norvegici | 112  | 96   | 142  | 39   | 46   | 32   | 0.859033  | 0.562358   | 1.015739  | 0.185825  | 0.279878  | 0.195785  | 0.123020453 | -1.708864415 |
| Rattus_norvegici | 53   | 56   | 53   | 93   | 75   | 39   | 0.448137  | 0.457358   | 0.447905  | 0.622462  | 0.645322  | 0.334728  | 0.929727413 | 0.195045867  |
| Rattus_norvegici | 97   | 70   | 93   | 132  | 87   | 87   | 2.658086  | 1.847361   | 2.538586  | 2.868728  | 2.42054   | 2.410264  | 0.974613362 | 0.076251236  |
| Rattus_norvegici | 63   | 114  | 99   | 60   | 119  | 106  | 0.364687  | 0.651258   | 0.574464  | 0.278313  | 0.70889   | 0.626232  | 0.97585996  | -0.039590978 |
| Rattus_norvegici | 7202 | 7318 | 7116 | 8061 | 5415 | 5445 | 29.55102  | 29.294321  | 29.174084 | 26.222523 | 22.727076 | 22.663683 | 0.59367813  | -0.347428242 |
| Rattus_norvegici | 1885 | 2019 | 1896 | 1891 | 1406 | 1474 | 10.381794 | 12.232721  | 10.085867 | 7.552137  | 7.195365  | 7.146654  | 0.524033913 | -0.426284199 |
| Rattus_norvegici | 517  | 563  | 348  | 916  | 916  | 715  | 3.771669  | 4.012139   | 2.536809  | 5.299785  | 6.843267  | 5.292398  | 0.431655584 | 0.706724157  |
| Rattus_norvegici | 377  | 376  | 252  | 687  | 651  | 541  | 4.357862  | 4.292809   | 2.905346  | 6.298835  | 7.65714   | 6.348806  | 0.459481278 | 0.771698259  |
| Rattus_norvegici | 21   | 31   | 45   | 65   | 163  | 107  | 0.450197  | 0.701132   | 0.968059  | 1.20034   | 3.815027  | 2.466553  | 0.13649359  | 1.702609455  |
| Rattus_norvegici | 383  | 452  | 188  | 579  | 274  | 192  | 5.311842  | 6.069215   | 2.89247   | 6.361802  | 3.846458  | 2.764341  | 0.961842658 | -0.15517889  |
| Rattus_norvegici | 117  | 181  | 42   | 548  | 123  | 116  | 0.985723  | 1.490657   | 0.348567  | 3.681859  | 1.062791  | 0.998277  | 0.618890237 | 0.982356469  |
| Rattus_norvegici | 612  | 543  | 436  | 629  | 706  | 480  | 0.963633  | 0.833795   | 0.685528  | 0.785124  | 1.136879  | 0.766778  | 0.980231989 | 0.063931245  |
| Rattus_norvegici | 83   | 72   | 75   | 135  | 121  | 87   | 0.510425  | 0.428876   | 0.457488  | 0.655723  | 0.75983   | 0.539275  | 0.830788821 | 0.433247371  |
| Rattus_norvegici | 121  | 204  | 172  | 148  | 193  | 144  | 1.284529  | 2.088498   | 1.84244   | 1.196564  | 2.066336  | 1.549169  | 0.947048519 | -0.148657534 |
| Rattus_norvegici | 218  | 156  | 153  | 67   | 10   | 20   | 3.300375  | 2.311179   | 2.465169  | 0.797107  | 0.140915  | 0.294895  | 0.01189572  | -2.682651683 |
| Rattus_norvegici | 48   | 173  | 68   | 81   | 51   | 51   | 0.649186  | 1.404027   | 0.443029  | 0.420642  | 0.40536   | 0.414112  | 0.61231962  | -0.806882946 |
| Rattus_norvegici | 69   | 3    | 26   | 15   | 492  | 208  | 0.403929  | 0.011614   | 0.148947  | 0.069536  | 3.065395  | 1.252654  | 0.367511073 | 2.830531643  |
| Rattus_norvegici | 88   | 106  | 77   | 188  | 61   | 150  | 0.574378  | 0.675887   | 0.501699  | 0.974974  | 0.403996  | 0.997979  | 0.840372775 | 0.389982884  |
| Rattus_norvegici | 67   | 29   | 57   | 105  | 19   | 148  | 0.202548  | 0.085854   | 0.172282  | 0.254647  | 0.058849  | 0.457493  | 0.736401936 | 0.675973805  |
| Rattus_norvegici | 232  | 35   | 120  | 142  | 3    | 19   | 1.06506   | 0.132116   | 0.77429   | 0.444949  | 0.008169  | 0.072684  | 0.562942809 | -1.546247253 |

|                  |      |      |      |      |      |      |            |            |            |            |            |            |             |              |
|------------------|------|------|------|------|------|------|------------|------------|------------|------------|------------|------------|-------------|--------------|
| Rattus_norvegici | 65   | 43   | 70   | 61   | 54   | 39   | 0.408095   | 0.25981    | 0.438835   | 0.304678   | 0.34529    | 0.246007   | 0.862426953 | -0.35735092  |
| Rattus_norvegici | 960  | 465  | 1460 | 89   | 130  | 238  | 3.669115   | 1.704744   | 6.986041   | 0.326227   | 0.315942   | 0.738034   | 0.012659277 | -2.755693051 |
| Rattus_norvegici | 2981 | 3073 | 4393 | 4086 | 4396 | 5745 | 156.637085 | 157.521729 | 230.658615 | 170.188522 | 236.276901 | 306.227173 | 0.652488772 | 0.329037045  |
| Rattus_norvegici | 79   | 53   | 48   | 172  | 134  | 136  | 1.999543   | 1.289944   | 1.209021   | 3.446724   | 3.456587   | 3.486319   | 0.388218506 | 1.153718988  |
| Rattus_norvegici | 38   | 33   | 70   | 103  | 75   | 109  | 0.215888   | 0.180695   | 0.393213   | 0.461446   | 0.436504   | 0.627342   | 0.536433534 | 0.882506144  |
| Rattus_norvegici | 44   | 55   | 102  | 66   | 167  | 101  | 0.332102   | 0.402553   | 0.765113   | 0.392027   | 1.286994   | 0.774311   | 0.736401936 | 0.643732243  |
| Rattus_norvegici | 21   | 108  | 94   | 37   | 32   | 50   | 0.127284   | 0.667365   | 0.58961    | 0.185679   | 0.201552   | 0.315693   | 0.451264507 | -1.024093516 |
| Rattus_norvegici | 145  | 19   | 188  | 770  | 6    | 3    | 0.542006   | 0.06289    | 0.72582    | 2.339576   | 0.020969   | 0.00722    | 0.868893571 | 0.789670102  |
| Rattus_norvegici | 86   | 498  | 567  | 129  | 98   | 103  | 1.268683   | 2.652886   | 3.464899   | 0.930733   | 0.725911   | 1.268487   | 0.203910945 | -1.946870061 |
| Rattus_norvegici | 40   | 122  | 19   | 67   | 121  | 47   | 0.384897   | 1.144725   | 0.176854   | 0.508528   | 1.184661   | 0.454935   | 0.938030911 | 0.287852238  |
| Rattus_norvegici | 1604 | 1396 | 1825 | 1317 | 980  | 1340 | 20.656912  | 17.536715  | 23.480286  | 13.439703  | 12.909512  | 17.49909   | 0.386501302 | -0.546251664 |
| Rattus_norvegici | 188  | 150  | 191  | 86   | 73   | 45   | 2.956417   | 2.332295   | 2.871676   | 1.482852   | 1.585812   | 1.340761   | 0.210535032 | -1.52817301  |
| Rattus_norvegici | 1783 | 1864 | 1705 | 2934 | 2023 | 1930 | 16.571575  | 16.905775  | 15.845344  | 21.631073  | 19.245958  | 18.201894  | 0.791270336 | 0.210648134  |
| Rattus_norvegici | 452  | 103  | 749  | 65   | 25   | 57   | 2.429458   | 0.824249   | 4.27027    | 0.332985   | 0.199508   | 0.489104   | 0.081512679 | -3.326499652 |
| Rattus_norvegici | 268  | 314  | 374  | 284  | 74   | 168  | 2.468655   | 2.892138   | 3.332022   | 0.999774   | 0.667555   | 1.887955   | 0.416531982 | -1.056416823 |
| Rattus_norvegici | 73   | 26   | 236  | 141  | 26   | 44   | 0.609974   | 0.205823   | 1.986205   | 0.936546   | 0.221953   | 0.373734   | 0.806122745 | -0.918841602 |
| Rattus_norvegici | 64   | 50   | 66   | 138  | 46   | 46   | 0.575522   | 0.436519   | 0.593817   | 0.983003   | 0.41727    | 0.412171   | 0.931678986 | 0.141218559  |
| Rattus_norvegici | 82   | 31   | 179  | 50   | 49   | 75   | 0.516678   | 0.189469   | 1.12856    | 0.246738   | 0.316006   | 0.481137   | 0.655527903 | -0.87576546  |
| Rattus_norvegici | 364  | 332  | 317  | 688  | 556  | 606  | 6.15209    | 6.028592   | 5.850797   | 10.551734  | 10.476116  | 11.684434  | 0.492707238 | 0.73145775   |
| Rattus_norvegici | 177  | 211  | 296  | 61   | 71   | 64   | 1.293252   | 1.50311    | 2.163942   | 0.35415    | 0.527944   | 0.471793   | 0.07422266  | -1.925094261 |
| Rattus_norvegici | 367  | 299  | 252  | 402  | 279  | 336  | 3.864209   | 2.870794   | 2.474878   | 3.05786    | 2.947699   | 3.27549    | 1           | 0.003683465  |
| Rattus_norvegici | 214  | 127  | 241  | 268  | 226  | 604  | 2.511533   | 1.316134   | 2.959323   | 2.220733   | 2.673059   | 6.708387   | 0.601502145 | 0.806674193  |
| Rattus_norvegici | 19   | 79   | 11   | 97   | 100  | 32   | 0.112771   | 0.478933   | 0.062827   | 0.478409   | 0.632279   | 0.202604   | 0.588226484 | 0.941372625  |
| Rattus_norvegici | 685  | 899  | 754  | 644  | 420  | 459  | 11.776995  | 14.808679  | 13.13612   | 8.61057    | 7.218912   | 7.761164   | 0.373846378 | -0.769915511 |
| Rattus_norvegici | 6240 | 6651 | 7029 | 9864 | 8234 | 9970 | 254.364349 | 264.499359 | 286.288208 | 318.7659   | 343.325836 | 412.248932 | 0.569951566 | 0.362228753  |
| Rattus_norvegici | 263  | 257  | 222  | 635  | 253  | 0    | 1.903241   | 1.812196   | 1.601574   | 3.645948   | 1.875058   | 0          | 0.973439885 | 0.017154103  |
| Rattus_norvegici | 146  | 172  | 0    | 0    | 100  | 0    | 4.104022   | 4.732388   | 0          | 0          | 2.873977   | 0          | 0.522771806 | -1.667489206 |
| Rattus_norvegici | 110  | 104  | 30   | 38   | 57   | 38   | 2.151716   | 1.902099   | 0.562409   | 0.566021   | 1.150992   | 0.734551   | 0.437984511 | -0.975714312 |
| Rattus_norvegici | 337  | 208  | 353  | 110  | 144  | 102  | 2.317474   | 1.365285   | 3.154808   | 0.599839   | 1.000352   | 0.70512    | 0.182376047 | -1.45655769  |
| Rattus_norvegici | 61   | 58   | 80   | 123  | 49   | 45   | 1.243326   | 1.149434   | 1.642115   | 2.298807   | 1.027622   | 0.932753   | 0.997887198 | -0.077016825 |
| Rattus_norvegici | 30   | 484  | 20   | 14   | 245  | 532  | 0.05908    | 1.619628   | 0.038383   | 0.021625   | 1.134      | 1.093947   | 0.931678986 | 0.558196899  |
| Rattus_norvegici | 104  | 118  | 71   | 1645 | 415  | 470  | 0.878568   | 0.94681    | 0.853159   | 8.590578   | 2.627972   | 3.193396   | 0.063526152 | 2.888742901  |
| Rattus_norvegici | 55   | 55   | 60   | 76   | 71   | 79   | 0.497329   | 0.486592   | 0.536962   | 0.54608    | 0.650152   | 0.719868   | 0.904244292 | 0.282951134  |
| Rattus_norvegici | 59   | 52   | 79   | 30   | 23   | 18   | 0.691868   | 0.600523   | 0.928169   | 0.272973   | 0.267664   | 0.210206   | 0.108820214 | -1.576615389 |
| Rattus_norvegici | 40   | 30   | 51   | 87   | 83   | 65   | 0.506325   | 0.376218   | 0.660228   | 0.887562   | 1.088515   | 0.844687   | 0.561946307 | 0.816418763  |
| Rattus_norvegici | 17   | 21   | 14   | 356  | 71   | 115  | 0.075062   | 0.089619   | 0.063681   | 1.290339   | 0.330996   | 0.530012   | 0.062828265 | 3.156566597  |
| Rattus_norvegici | 61   | 488  | 389  | 1039 | 473  | 379  | 0.502988   | 5.066657   | 4.1585     | 8.840945   | 6.101346   | 4.339168   | 0.474979183 | 0.82300938   |
| Rattus_norvegici | 27   | 21   | 0    | 80   | 137  | 267  | 0.137399   | 0.103237   | 0          | 0.335038   | 0.89004    | 1.441042   | 0.037731251 | 3.268194625  |
| Rattus_norvegici | 1529 | 1345 | 728  | 1299 | 860  | 824  | 6.208718   | 5.33125    | 2.95203    | 4.181392   | 3.572908   | 3.393819   | 0.61231962  | -0.424089895 |
| Rattus_norvegici | 103  | 84   | 165  | 649  | 294  | 476  | 0.707843   | 0.435655   | 1.022628   | 3.356324   | 1.767398   | 3.112359   | 0.042783242 | 1.838496867  |
| Rattus_norvegici | 181  | 76   | 404  | 19   | 8    | 3    | 0.492922   | 0.20235    | 1.104679   | 0.039104   | 0.019626   | 0.008262   | 0.024927654 | -4.694742278 |
| Rattus_norvegici | 322  | 310  | 326  | 813  | 258  | 328  | 2.268938   | 2.128648   | 2.292397   | 4.543469   | 1.856284   | 2.34573    | 0.795033032 | 0.341577527  |
| Rattus_norvegici | 155  | 95   | 226  | 3    | 183  | 218  | 1.089581   | 0.651051   | 1.593885   | 0.012888   | 1.319468   | 1.55741    | 0.870783091 | -0.275236609 |
| Rattus_norvegici | 5047 | 2033 | 1140 | 5392 | 5095 | 91   | 18.75718   | 7.373049   | 9.122002   | 20.426106  | 20.34324   | 0.340079   | 0.950681812 | 0.192104599  |
| Rattus_norvegici | 250  | 296  | 88   | 141  | 90   | 49   | 0.932724   | 1.078282   | 0.326063   | 0.416073   | 0.342229   | 0.183132   | 0.289634456 | -1.345791542 |
| Rattus_norvegici | 304  | 365  | 136  | 226  | 117  | 51   | 1.800088   | 1.890941   | 0.828462   | 0.981846   | 0.660425   | 0.301014   | 0.340660192 | -1.220911943 |
| Rattus_norvegici | 52   | 47   | 20   | 106  | 4    | 19   | 0.698967   | 0.98898    | 0.1863     | 0.783315   | 0.037733   | 0.173406   | 0.997552428 | -0.162032253 |
| Rattus_norvegici | 10   | 61   | 2    | 72   | 51   | 37   | 0.236023   | 1.410286   | 0.037203   | 1.352634   | 1.219139   | 0.876054   | 0.535964401 | 0.997282536  |
| Rattus_norvegici | 67   | 62   | 76   | 41   | 113  | 62   | 0.682703   | 0.614532   | 0.77776    | 0.334439   | 1.188476   | 0.639745   | 0.984582485 | -0.005985815 |
| Rattus_norvegici | 84   | 84   | 76   | 66   | 60   | 65   | 0.955376   | 0.933924   | 0.862398   | 0.593445   | 0.692451   | 0.744088   | 0.793744248 | -0.482019263 |
| Rattus_norvegici | 171  | 172  | 201  | 333  | 118  | 107  | 0.500077   | 0.407803   | 0.587943   | 0.750878   | 0.292064   | 0.263472   | 0.970215705 | -0.173210172 |

|                  |      |     |      |      |      |      |           |           |           |           |           |           |             |              |
|------------------|------|-----|------|------|------|------|-----------|-----------|-----------|-----------|-----------|-----------|-------------|--------------|
| Rattus_norvegici | 625  | 802 | 750  | 1138 | 279  | 310  | 8.328049  | 10.227019 | 10.110367 | 11.565694 | 3.888763  | 4.016068  | 0.666187484 | -0.562302227 |
| Rattus_norvegici | 351  | 40  | 111  | 40   | 7    | 47   | 2.768953  | 0.303683  | 0.869338  | 0.247926  | 0.056327  | 0.374009  | 0.35214931  | -2.582315585 |
| Rattus_norvegici | 98   | 61  | 97   | 70   | 30   | 18   | 1.939881  | 1.182224  | 1.921135  | 1.099268  | 0.597378  | 0.364531  | 0.289327784 | -1.327840662 |
| Rattus_norvegici | 21   | 299 | 86   | 21   | 203  | 128  | 0.141634  | 2.384346  | 0.606455  | 0.122785  | 1.900989  | 1.289466  | 0.932898163 | -0.230255524 |
| Rattus_norvegici | 51   | 28  | 90   | 34   | 36   | 55   | 0.348978  | 0.185383  | 0.625538  | 0.182659  | 0.403021  | 0.384288  | 0.713840198 | -0.555158774 |
| Rattus_norvegici | 45   | 115 | 99   | 165  | 77   | 95   | 0.662437  | 1.6458    | 1.442623  | 1.926682  | 1.154566  | 1.410734  | 0.924102096 | 0.207260793  |
| Rattus_norvegici | 40   | 47  | 44   | 111  | 57   | 58   | 1.094959  | 1.282195  | 1.209043  | 2.464208  | 1.61573   | 1.638321  | 0.677279632 | 0.612768538  |
| Rattus_norvegici | 1449 | 831 | 5496 | 29   | 15   | 12   | 8.302223  | 4.627712  | 23.765001 | 0.107924  | 0.081336  | 0.082524  | 0.017251876 | -7.317800697 |
| Rattus_norvegici | 145  | 60  | 100  | 466  | 58   | 4    | 1.17142   | 0.323048  | 0.467295  | 1.861132  | 0.235692  | 0.013198  | 0.883105385 | 0.48442596   |
| Rattus_norvegici | 86   | 124 | 164  | 107  | 71   | 71   | 0.518455  | 0.72997   | 0.988976  | 0.513206  | 0.440239  | 0.435205  | 0.656036972 | -0.745241946 |
| Rattus_norvegici | 192  | 200 | 199  | 184  | 78   | 89   | 1.07324   | 0.889357  | 1.06607   | 0.824569  | 0.449251  | 0.408773  | 0.545544642 | -0.937270399 |
| Rattus_norvegici | 98   | 101 | 86   | 99   | 93   | 72   | 0.693275  | 0.697846  | 0.610224  | 0.559382  | 0.675027  | 0.519076  | 0.918180337 | -0.246187245 |
| Rattus_norvegici | 478  | 546 | 585  | 823  | 663  | 607  | 8.583996  | 9.516577  | 10.48323  | 11.67049  | 12.005333 | 10.97299  | 0.868179588 | 0.235097527  |
| Rattus_norvegici | 379  | 267 | 203  | 236  | 178  | 178  | 1.560274  | 1.283838  | 0.929498  | 0.659788  | 0.990137  | 0.941721  | 0.656036972 | -0.663943989 |
| Rattus_norvegici | 125  | 106 | 121  | 54   | 7    | 14   | 0.521528  | 0.430446  | 0.505176  | 0.177354  | 0.025912  | 0.05907   | 0.017488321 | -2.482410525 |
| Rattus_norvegici | 192  | 104 | 124  | 118  | 82   | 111  | 2.333367  | 1.337997  | 1.590833  | 1.282313  | 1.069564  | 1.306784  | 0.75566708  | -0.576356521 |
| Rattus_norvegici | 140  | 100 | 106  | 164  | 180  | 129  | 8.57934   | 5.958572  | 6.474455  | 7.968284  | 11.246829 | 7.977856  | 0.89124181  | 0.322022103  |
| Rattus_norvegici | 830  | 825 | 699  | 1112 | 666  | 573  | 5.132964  | 4.974028  | 4.318967  | 5.448812  | 4.208543  | 3.59238   | 0.921829905 | -0.168704013 |
| Rattus_norvegici | 54   | 62  | 64   | 48   | 37   | 57   | 0.779926  | 0.871156  | 0.922236  | 0.545176  | 0.538518  | 0.830512  | 0.782573608 | -0.471226353 |
| Rattus_norvegici | 673  | 949 | 844  | 1298 | 975  | 1120 | 9.186046  | 13.313881 | 11.569473 | 11.730941 | 14.81497  | 15.542846 | 0.743854823 | 0.320592382  |
| Rattus_norvegici | 89   | 67  | 89   | 188  | 104  | 59   | 0.908574  | 0.672617  | 0.910566  | 1.530409  | 1.088992  | 0.607762  | 0.862323484 | 0.328717041  |
| Rattus_norvegici | 722  | 652 | 570  | 658  | 465  | 631  | 7.156925  | 6.950879  | 7.713161  | 5.159841  | 7.606235  | 8.02676   | 0.830272218 | -0.28691105  |
| Rattus_norvegici | 493  | 494 | 535  | 867  | 439  | 693  | 2.212813  | 2.165     | 2.400775  | 3.091379  | 2.015832  | 3.314104  | 0.863766916 | 0.234152839  |
| Rattus_norvegici | 47   | 93  | 77   | 146  | 117  | 134  | 1.264194  | 2.492007  | 2.125076  | 2.898066  | 3.158393  | 3.753664  | 0.652606811 | 0.737362941  |
| Rattus_norvegici | 368  | 337 | 554  | 358  | 260  | 340  | 1.562774  | 1.395035  | 2.350956  | 1.204535  | 1.12658   | 1.464301  | 0.695042273 | -0.53845121  |
| Rattus_norvegici | 883  | 647 | 861  | 1528 | 1192 | 691  | 1.935162  | 1.54983   | 2.221262  | 3.272296  | 3.334776  | 1.935446  | 0.686927562 | 0.350576023  |
| Rattus_norvegici | 0    | 0   | 56   | 159  | 101  | 0    | 0         | 0         | 0.289547  | 0.653229  | 0.537972  | 0         | 0.437987624 | 1.977692302  |
| Rattus_norvegici | 84   | 69  | 99   | 664  | 178  | 173  | 1.50612   | 0.980555  | 1.662462  | 7.571873  | 2.436443  | 2.418506  | 0.231491643 | 1.779094793  |
| Rattus_norvegici | 240  | 74  | 153  | 113  | 777  | 724  | 4.935137  | 1.485636  | 3.143147  | 1.835608  | 16.392906 | 15.143374 | 0.336928498 | 1.736592628  |
| Rattus_norvegici | 247  | 68  | 150  | 106  | 739  | 711  | 5.442004  | 1.455624  | 3.302705  | 1.83867   | 16.674168 | 15.913942 | 0.357966109 | 1.690071775  |
| Rattus_norvegici | 105  | 116 | 205  | 0    | 0    | 537  | 1.918559  | 3.917065  | 2.879124  | 0         | 0         | 7.93926   | 0.976915757 | 0.288582162  |
| Rattus_norvegici | 87   | 93  | 126  | 33   | 26   | 25   | 1.669841  | 1.251284  | 1.972499  | 0.548472  | 0.363933  | 0.505666  | 0.05018998  | -2.011995508 |
| Rattus_norvegici | 183  | 0   | 9    | 4096 | 170  | 159  | 0.191777  | 0         | 0.008453  | 3.410789  | 0.181991  | 0.169109  | 0.453082866 | 4.203729642  |
| Rattus_norvegici | 37   | 73  | 31   | 163  | 123  | 76   | 0.591721  | 0.979388  | 0.411563  | 1.881793  | 1.741187  | 1.07975   | 0.337628902 | 1.209638419  |
| Rattus_norvegici | 154  | 77  | 100  | 63   | 74   | 76   | 1.366495  | 0.54794   | 1.043032  | 0.423263  | 0.713172  | 1.006296  | 0.625029369 | -0.752816625 |
| Rattus_norvegici | 56   | 63  | 57   | 15   | 36   | 24   | 0.789283  | 0.863043  | 0.808272  | 0.161024  | 0.516911  | 0.344264  | 0.173614659 | -1.31282132  |
| Rattus_norvegici | 321  | 507 | 655  | 468  | 534  | 577  | 1.294929  | 2.252501  | 2.940861  | 1.386476  | 2.458244  | 2.219204  | 0.981782909 | -0.026879189 |
| Rattus_norvegici | 257  | 183 | 219  | 121  | 95   | 112  | 1.049405  | 0.801311  | 0.84171   | 0.574155  | 0.323759  | 0.413115  | 0.378230153 | -1.145659342 |
| Rattus_norvegici | 116  | 141 | 80   | 141  | 50   | 11   | 1.440101  | 1.765679  | 1.36014   | 1.397002  | 0.591104  | 0.239037  | 0.553934283 | -0.971864739 |
| Rattus_norvegici | 127  | 74  | 156  | 207  | 210  | 155  | 2.433619  | 1.389942  | 2.99853   | 3.164538  | 4.147737  | 3.027633  | 0.769709973 | 0.53987563   |
| Rattus_norvegici | 87   | 705 | 348  | 62   | 59   | 3    | 0.508173  | 2.61676   | 1.471965  | 0.339573  | 0.404071  | 0.009085  | 0.107180642 | -3.361483478 |
| Rattus_norvegici | 202  | 411 | 418  | 52   | 55   | 110  | 0.685949  | 1.266461  | 1.41543   | 0.11543   | 0.151598  | 0.356293  | 0.011965587 | -2.34850347  |
| Rattus_norvegici | 1212 | 958 | 1109 | 1055 | 705  | 868  | 20.202385 | 15.585114 | 18.473368 | 13.94056  | 12.01908  | 14.669389 | 0.578232581 | -0.468248796 |
| Rattus_norvegici | 59   | 47  | 133  | 31   | 45   | 43   | 0.61563   | 0.473895  | 1.393542  | 0.253213  | 0.483121  | 0.450825  | 0.381650001 | -1.120056818 |
| Rattus_norvegici | 246  | 269 | 279  | 92   | 43   | 54   | 1.456264  | 1.195986  | 1.652214  | 0.354604  | 0.173127  | 0.233074  | 0.031167807 | -2.245193185 |
| Rattus_norvegici | 61   | 62  | 66   | 49   | 52   | 37   | 0.325964  | 0.326636  | 0.354685  | 0.21008   | 0.28739   | 0.198283  | 0.707817472 | -0.585163009 |
| Rattus_norvegici | 205  | 181 | 384  | 314  | 155  | 480  | 0.486883  | 0.417894  | 0.910912  | 0.590223  | 0.375799  | 1.156186  | 0.943971713 | 0.164326111  |
| Rattus_norvegici | 68   | 62  | 82   | 67   | 113  | 77   | 0.892199  | 0.797366  | 1.179452  | 0.719118  | 1.773131  | 1.040559  | 0.96065848  | 0.173123619  |
| Rattus_norvegici | 87   | 147 | 57   | 77   | 45   | 39   | 0.661386  | 1.090757  | 0.432413  | 0.463702  | 0.344901  | 0.294095  | 0.470034001 | -1.014436634 |
| Rattus_norvegici | 495  | 60  | 529  | 155  | 0    | 113  | 2.703347  | 1.578675  | 3.380385  | 1.014944  | 0         | 0.977987  | 0.234492256 | -2.238187424 |
| Rattus_norvegici | 87   | 54  | 53   | 114  | 61   | 40   | 0.386445  | 0.232438  | 0.234229  | 0.402617  | 0.277033  | 0.176916  | 1           | -0.037754461 |

|                  |      |      |      |       |      |      |            |            |            |            |           |            |             |              |
|------------------|------|------|------|-------|------|------|------------|------------|------------|------------|-----------|------------|-------------|--------------|
| Rattus_norvegici | 235  | 149  | 202  | 145   | 167  | 100  | 1.575142   | 0.955935   | 1.233774   | 0.790188   | 1.180485  | 0.647136   | 0.696833153 | -0.640416055 |
| Rattus_norvegici | 305  | 216  | 297  | 169   | 147  | 109  | 2.844382   | 1.853878   | 2.59302    | 1.42475    | 1.376031  | 0.930905   | 0.388603717 | -1.092035617 |
| Rattus_norvegici | 186  | 0    | 73   | 325   | 204  | 215  | 3.443703   | 0          | 1.339038   | 4.771969   | 3.855448  | 4.03299    | 0.254940172 | 1.35461885   |
| Rattus_norvegici | 206  | 401  | 38   | 111   | 2    | 44   | 0.701265   | 1.336043   | 0.129375   | 0.299269   | 0.003917  | 0.152124   | 0.323977291 | -2.269638762 |
| Rattus_norvegici | 134  | 102  | 99   | 149   | 80   | 97   | 3.074495   | 2.249847   | 2.213531   | 2.736284   | 1.991761  | 2.187007   | 0.946770088 | -0.203905481 |
| Rattus_norvegici | 357  | 321  | 348  | 166   | 188  | 107  | 1.555379   | 1.189535   | 1.073748   | 0.621675   | 1.021865  | 0.720212   | 0.24079018  | -1.286534496 |
| Rattus_norvegici | 248  | 214  | 237  | 65    | 98   | 70   | 1.685994   | 1.171144   | 1.519826   | 0.38194    | 0.719375  | 0.438303   | 0.123536408 | -1.693535539 |
| Rattus_norvegici | 188  | 234  | 196  | 156   | 179  | 177  | 1.201892   | 1.846426   | 1.156309   | 1.216267   | 1.08368   | 1.040081   | 0.834060455 | -0.386276266 |
| Rattus_norvegici | 110  | 138  | 122  | 43    | 15   | 12   | 0.81507    | 1.000621   | 0.90605    | 0.249762   | 0.106909  | 0.085651   | 0.01028663  | -2.614302769 |
| Rattus_norvegici | 81   | 90   | 120  | 81    | 135  | 135  | 2.247239   | 2.593494   | 3.228413   | 2.19406    | 5.14739   | 5.092329   | 0.964241181 | 0.172922491  |
| Rattus_norvegici | 84   | 56   | 52   | 132   | 0    | 10   | 0.495006   | 0.318872   | 0.302403   | 0.614343   | 0         | 0.059046   | 0.8366986   | -0.756680238 |
| Rattus_norvegici | 0    | 75   | 65   | 0     | 75   | 170  | 0          | 0.700321   | 0.618849   | 0          | 0.731125  | 1.645038   | 0.855796944 | 0.778865146  |
| Rattus_norvegici | 690  | 512  | 4051 | 31    | 42   | 10   | 2.517524   | 2.646592   | 13.265126  | 0.122611   | 0.362784  | 0.043982   | 0.108660027 | -6.13665324  |
| Rattus_norvegici | 5    | 86   | 176  | 375   | 466  | 376  | 0.049523   | 0.932096   | 1.962609   | 3.317659   | 5.328058  | 4.260503   | 0.030355944 | 2.062172902  |
| Rattus_norvegici | 221  | 186  | 175  | 198   | 41   | 17   | 1.614452   | 1.190667   | 1.04599    | 1.188721   | 0.220075  | 0.082949   | 0.291510032 | -1.450091889 |
| Rattus_norvegici | 142  | 124  | 103  | 76    | 126  | 98   | 2.302301   | 1.961009   | 1.674851   | 0.978532   | 2.098277  | 1.621786   | 0.83211686  | -0.39718429  |
| Rattus_norvegici | 368  | 202  | 374  | 441   | 256  | 334  | 5.739669   | 2.612333   | 4.964927   | 4.658854   | 3.478763  | 4.509284   | 0.997245298 | -0.034395676 |
| Rattus_norvegici | 56   | 92   | 58   | 12    | 13   | 89   | 0.55871    | 0.898601   | 0.695209   | 0.133065   | 0.131333  | 1.10151    | 0.524727278 | -0.914132977 |
| Rattus_norvegici | 53   | 24   | 27   | 32    | 111  | 60   | 3.489768   | 1.492918   | 1.721802   | 1.629447   | 7.513033  | 4.012153   | 0.627136488 | 0.893812161  |
| Rattus_norvegici | 204  | 195  | 195  | 345   | 197  | 204  | 2.196042   | 2.049339   | 2.092733   | 2.943344   | 2.161903  | 2.225609   | 0.937914055 | 0.162882819  |
| Rattus_norvegici | 101  | 78   | 936  | 0     | 7    | 16   | 0.161462   | 0.121635   | 1.495042   | 0          | 0.010367  | 0.0257     | 0.236452036 | -5.653805294 |
| Rattus_norvegici | 105  | 121  | 182  | 43    | 34   | 73   | 1.121134   | 1.27023    | 1.952399   | 0.363553   | 0.368502  | 0.795211   | 0.179550382 | -1.562723911 |
| Rattus_norvegici | 628  | 972  | 682  | 919   | 991  | 918  | 7.649017   | 11.556941  | 8.297468   | 8.875845   | 12.35548  | 11.342563  | 0.897780158 | 0.19089495   |
| Rattus_norvegici | 58   | 46   | 60   | 71    | 27   | 29   | 0.794174   | 0.617289   | 0.824393   | 0.776149   | 0.372382  | 0.406957   | 0.754504041 | -0.56816632  |
| Rattus_norvegici | 163  | 900  | 437  | 290   | 424  | 93   | 1.175602   | 5.448655   | 2.879237   | 1.515368   | 2.595013  | 0.597415   | 0.591656566 | -1.012212313 |
| Rattus_norvegici | 74   | 20   | 147  | 101   | 100  | 68   | 0.923325   | 0.347234   | 2.525908   | 1.095188   | 1.67026   | 1.021743   | 0.997360121 | 0.005559254  |
| Rattus_norvegici | 4867 | 5002 | 5387 | 7803  | 5425 | 5051 | 12.771223  | 13.628307  | 14.922366  | 16.222647  | 15.911768 | 13.667245  | 0.896406474 | 0.105840083  |
| Rattus_norvegici | 2692 | 2606 | 1132 | 2639  | 1471 | 1044 | 79.355812  | 74.953484  | 33.322147  | 61.664536  | 44.359867 | 31.193264  | 0.646781497 | -0.492554902 |
| Rattus_norvegici | 99   | 63   | 19   | 160   | 223  | 109  | 1.66822    | 0.978284   | 0.585289   | 1.608152   | 2.179389  | 0.771636   | 0.307138677 | 1.32939308   |
| Rattus_norvegici | 188  | 137  | 336  | 236   | 9    | 2    | 3.257218   | 2.323901   | 5.840074   | 3.253713   | 0.145816  | 0.026313   | 0.317097982 | -1.758588162 |
| Rattus_norvegici | 1246 | 881  | 1466 | 1492  | 408  | 1009 | 6.548444   | 4.649134   | 8.176798   | 6.666967   | 1.868329  | 5.773018   | 0.616541129 | -0.494165547 |
| Rattus_norvegici | 88   | 104  | 55   | 24    | 17   | 44   | 2.919943   | 3.55457    | 1.833068   | 0.618501   | 0.617691  | 1.360504   | 0.105778632 | -1.647147817 |
| Rattus_norvegici | 367  | 583  | 245  | 694   | 747  | 498  | 1.329498   | 2.060044   | 0.887199   | 1.992528   | 2.767763  | 1.83052    | 0.619347067 | 0.575679114  |
| Rattus_norvegici | 79   | 17   | 14   | 3     | 149  | 56   | 0.340942   | 0.069213   | 0.057054   | 0.006918   | 0.656379  | 0.245228   | 0.838276302 | 0.893001033  |
| Rattus_norvegici | 100  | 12   | 0    | 289   | 14   | 63   | 0.983844   | 0.103256   | 0          | 2.368477   | 0.079978  | 0.518034   | 0.672446833 | 1.435372043  |
| Rattus_norvegici | 81   | 51   | 55   | 1043  | 65   | 86   | 0.446459   | 0.271132   | 0.303235   | 4.579595   | 0.366912  | 0.482816   | 0.571504159 | 2.372246526  |
| Rattus_norvegici | 194  | 183  | 493  | 139   | 41   | 45   | 1.807534   | 1.859171   | 4.524054   | 0.871396   | 0.541542  | 0.802918   | 0.140392852 | -2.17729521  |
| Rattus_norvegici | 15   | 220  | 223  | 31    | 61   | 38   | 0.120147   | 2.093137   | 1.986003   | 0.20412    | 0.52503   | 0.317673   | 0.301656734 | -1.910614554 |
| Rattus_norvegici | 19   | 151  | 31   | 71    | 125  | 80   | 0.336587   | 2.723351   | 0.57021    | 1.046406   | 2.374505  | 1.497398   | 0.912976521 | 0.376378592  |
| Rattus_norvegici | 92   | 93   | 103  | 80    | 44   | 34   | 0.599476   | 0.839109   | 0.830595   | 0.413814   | 0.296543  | 0.224269   | 0.46168591  | -1.045842098 |
| Rattus_norvegici | 52   | 52   | 5    | 135   | 47   | 7    | 0.468121   | 0.45295    | 0.036282   | 0.965075   | 0.430746  | 0.055188   | 0.83360946  | 0.562765385  |
| Rattus_norvegici | 85   | 53   | 0    | 359   | 117  | 0    | 1.191001   | 0.703879   | 0          | 1.465215   | 0.537019  | 0          | 0.605984977 | 1.540244174  |
| Rattus_norvegici | 0    | 91   | 6    | 127   | 102  | 3    | 0          | 0.702721   | 0.080654   | 0.808971   | 0.836144  | 0.037532   | 0.725884716 | 1.099629402  |
| Rattus_norvegici | 14   | 49   | 101  | 70    | 13   | 121  | 0.135416   | 0.475285   | 1.07519    | 0.573346   | 0.123471  | 1.394064   | 0.965891051 | 0.170365413  |
| Rattus_norvegici | 66   | 75   | 59   | 113   | 101  | 357  | 0.576155   | 0.633889   | 0.510429   | 0.776018   | 0.919917  | 3.18519    | 0.497599201 | 1.42549529   |
| Rattus_norvegici | 979  | 1503 | 1611 | 2603  | 874  | 603  | 3.447573   | 4.478967   | 6.121859   | 7.893666   | 4.141087  | 2.038169   | 0.939688619 | -0.226147461 |
| Rattus_norvegici | 190  | 147  | 297  | 152   | 100  | 4    | 0.473906   | 0.386278   | 0.795773   | 0.32177    | 0.272351  | 0.009574   | 0.230597163 | -1.517867333 |
| Rattus_norvegici | 165  | 67   | 115  | 241   | 82   | 123  | 1.360214   | 0.531937   | 0.944651   | 1.571347   | 0.689652  | 1.030226   | 0.93142015  | 0.165732759  |
| Rattus_norvegici | 2545 | 2503 | 3408 | 3041  | 1007 | 3898 | 41.181992  | 39.513714  | 55.103302  | 39.010685  | 16.6703   | 63.981499  | 0.871169474 | -0.238561235 |
| Rattus_norvegici | 7656 | 6434 | 6425 | 12012 | 1588 | 8852 | 149.613159 | 120.250694 | 124.108005 | 184.229439 | 30.290349 | 172.169609 | 0.996432841 | -0.063085206 |
| Rattus_norvegici | 832  | 779  | 884  | 1226  | 1080 | 1348 | 4.096352   | 3.681341   | 4.285359   | 4.893303   | 5.482621  | 6.654722   | 0.628461562 | 0.42191087   |

|                  |      |      |      |       |       |       |            |            |            |           |            |            |             |              |
|------------------|------|------|------|-------|-------|-------|------------|------------|------------|-----------|------------|------------|-------------|--------------|
| Rattus_norvegici | 362  | 340  | 376  | 550   | 508   | 551   | 2.405609   | 2.206297   | 2.499065   | 2.896943  | 3.455854   | 3.715862   | 0.7481198   | 0.44822218   |
| Rattus_norvegici | 358  | 836  | 147  | 1551  | 504   | 490   | 1.947937   | 4.243411   | 0.708066   | 5.816199  | 3.065219   | 2.489155   | 0.652488772 | 0.727881186  |
| Rattus_norvegici | 820  | 755  | 999  | 1916  | 1763  | 2235  | 2.221528   | 1.994541   | 2.703848   | 4.115992  | 4.885026   | 6.143033   | 0.028564817 | 1.073473699  |
| Rattus_norvegici | 1403 | 2282 | 807  | 2120  | 1546  | 1287  | 3.954589   | 6.528635   | 2.404684   | 4.911046  | 4.331608   | 3.430866   | 1           | -0.003013235 |
| Rattus_norvegici | 27   | 100  | 77   | 82    | 368   | 429   | 0.095914   | 0.346816   | 0.284534   | 0.243431  | 1.429928   | 1.653761   | 0.207631845 | 2.056628259  |
| Rattus_norvegici | 755  | 751  | 771  | 667   | 515   | 640   | 3.413813   | 3.314502   | 3.48596    | 2.393107  | 2.384154   | 2.935358   | 0.651225791 | -0.458437865 |
| Rattus_norvegici | 301  | 141  | 578  | 365   | 147   | 700   | 1.261167   | 0.481127   | 2.465427   | 1.132981  | 0.659955   | 2.975584   | 0.973689773 | 0.114066035  |
| Rattus_norvegici | 63   | 57   | 33   | 18    | 41    | 49    | 0.916073   | 0.810231   | 0.475639   | 0.202281  | 0.609307   | 0.73005    | 0.651225791 | -0.574330084 |
| Rattus_norvegici | 4156 | 5573 | 3335 | 1906  | 12975 | 13073 | 24.594505  | 33.162865  | 21.984618  | 9.39595   | 82.084274  | 82.416     | 0.583187196 | 1.056104677  |
| Rattus_norvegici | 179  | 154  | 672  | 14    | 7     | 3     | 1.149616   | 0.792077   | 3.956691   | 0.06475   | 0.044626   | 0.008691   | 0.029852463 | -5.605191268 |
| Rattus_norvegici | 71   | 40   | 81   | 87    | 38    | 34    | 0.595139   | 0.321379   | 0.67248    | 0.573786  | 0.322188   | 0.283441   | 0.828401417 | -0.470984176 |
| Rattus_norvegici | 0    | 673  | 677  | 0     | 0     | 667   | 0          | 3.799436   | 5.389865   | 0         | 0          | 5.764948   | 0.743001404 | -1.055548808 |
| Rattus_norvegici | 0    | 98   | 0    | 264   | 109   | 0     | 0          | 0.682954   | 0          | 1.50238   | 0.798285   | 0          | 0.585095545 | 1.719718767  |
| Rattus_norvegici | 34   | 59   | 49   | 691   | 114   | 274   | 0.277825   | 0.540743   | 0.434221   | 5.597556  | 1.172917   | 2.636458   | 0.093756839 | 2.703342401  |
| Rattus_norvegici | 72   | 80   | 66   | 251   | 171   | 156   | 2.869282   | 3.108653   | 2.621941   | 7.86578   | 7.023275   | 6.342644   | 0.325982201 | 1.252258683  |
| Rattus_norvegici | 161  | 156  | 109  | 176   | 157   | 122   | 1.604046   | 1.26835    | 1.073569   | 1.279792  | 1.582332   | 1.208156   | 0.989033344 | -0.04276839  |
| Rattus_norvegici | 66   | 48   | 118  | 87    | 29    | 173   | 1.057224   | 0.895052   | 1.903157   | 1.100558  | 0.540666   | 3.456268   | 0.956243754 | 0.185579779  |
| Rattus_norvegici | 1218 | 843  | 368  | 491   | 149   | 170   | 3.816839   | 5.728959   | 1.428193   | 2.828788  | 0.500455   | 0.609485   | 0.11935378  | -1.790871084 |
| Rattus_norvegici | 65   | 94   | 66   | 131   | 211   | 149   | 1.330587   | 1.886694   | 1.351807   | 2.123266  | 4.434846   | 3.093974   | 0.496185506 | 1.026042173  |
| Rattus_norvegici | 116  | 125  | 100  | 74    | 103   | 72    | 1.28559    | 1.596458   | 1.201195   | 0.685761  | 1.630612   | 0.743807   | 0.741358292 | -0.564340998 |
| Rattus_norvegici | 8606 | 8637 | 9139 | 10212 | 7687  | 7789  | 153.182816 | 149.984558 | 162.526733 | 144.09642 | 139.949753 | 140.625778 | 0.832770822 | -0.184455904 |
| Rattus_norvegici | 292  | 212  | 304  | 357   | 182   | 232   | 4.963644   | 3.501867   | 5.151599   | 4.810463  | 3.158762   | 3.985257   | 0.925241968 | -0.237942866 |
| Rattus_norvegici | 106  | 54   | 110  | 138   | 29    | 96    | 1.995189   | 0.978284   | 2.049936   | 2.101791  | 0.511173   | 1.711764   | 0.946648348 | -0.233349792 |
| Rattus_norvegici | 138  | 165  | 96   | 91    | 45    | 21    | 1.79018    | 2.264669   | 1.291305   | 0.96177   | 0.649883   | 0.282354   | 0.216650495 | -1.541228077 |
| Rattus_norvegici | 228  | 314  | 318  | 371   | 173   | 234   | 0.739348   | 0.992092   | 1.028399   | 0.95172   | 0.572666   | 0.76719    | 0.884453868 | -0.315756373 |
| Rattus_norvegici | 130  | 179  | 173  | 141   | 365   | 323   | 0.651679   | 0.874854   | 0.8663     | 0.560783  | 1.874293   | 1.645648   | 0.675896824 | 0.707099555  |
| Rattus_norvegici | 65   | 94   | 111  | 38    | 49    | 34    | 0.268799   | 0.384641   | 0.461707   | 0.12633   | 0.209852   | 0.141247   | 0.277477169 | -1.277666586 |
| Rattus_norvegici | 72   | 72   | 70   | 67    | 36    | 31    | 0.915821   | 0.78584    | 0.779448   | 0.59191   | 0.403408   | 0.377181   | 0.561414399 | -0.852121318 |
| Rattus_norvegici | 148  | 164  | 193  | 219   | 198   | 173   | 1.953925   | 1.812689   | 2.662833   | 2.256517  | 2.602329   | 1.810241   | 0.976734545 | 0.086131911  |
| Rattus_norvegici | 192  | 127  | 189  | 192   | 130   | 143   | 4.286456   | 3.141934   | 4.605145   | 3.647083  | 3.375445   | 3.459601   | 0.908862576 | -0.282026614 |
| Rattus_norvegici | 168  | 187  | 61   | 244   | 123   | 76    | 1.853753   | 2.012129   | 0.633432   | 2.183981  | 1.388465   | 0.84403    | 0.987598899 | -0.092430856 |
| Rattus_norvegici | 105  | 99   | 103  | 380   | 54    | 44    | 1.894108   | 1.942084   | 1.630345   | 5.252363  | 0.923556   | 0.597207   | 0.876878842 | 0.364352026  |
| Rattus_norvegici | 80   | 34   | 32   | 81    | 36    | 46    | 0.843916   | 0.34547    | 0.328458   | 0.677123  | 0.38487    | 0.490975   | 0.999283451 | -0.01877451  |
| Rattus_norvegici | 159  | 182  | 155  | 104   | 68    | 73    | 1.297722   | 1.055026   | 1.052263   | 0.653107  | 0.412745   | 0.435947   | 0.388792106 | -1.169881758 |
| Rattus_norvegici | 184  | 103  | 654  | 47    | 54    | 48    | 0.602976   | 0.22688    | 2.009473   | 0.074592  | 0.112321   | 0.097341   | 0.298937634 | -2.795945247 |
| Rattus_norvegici | 266  | 309  | 268  | 519   | 454   | 616   | 4.623697   | 5.212655   | 4.65091    | 7.165825  | 8.107586   | 10.95764   | 0.491056593 | 0.791189392  |
| Rattus_norvegici | 149  | 150  | 109  | 463   | 231   | 249   | 1.388737   | 1.3687     | 1.017853   | 3.431985  | 2.202478   | 2.358117   | 0.394939414 | 1.036747493  |
| Rattus_norvegici | 54   | 49   | 14   | 106   | 10    | 64    | 2.271386   | 2.004298   | 0.592916   | 3.538134  | 0.412671   | 2.735015   | 0.834962634 | 0.420110604  |
| Rattus_norvegici | 462  | 407  | 397  | 528   | 448   | 505   | 3.442299   | 3.074068   | 3.135055   | 3.1966    | 3.563699   | 3.89674    | 0.968467844 | 0.093216503  |
| Rattus_norvegici | 2    | 212  | 7    | 505   | 143   | 71    | 0.031597   | 6.52283    | 0.218854   | 12.649773 | 4.615694   | 2.261045   | 0.580441087 | 1.490091777  |
| Rattus_norvegici | 44   | 44   | 15   | 4754  | 153   | 102   | 0.10908    | 0.110894   | 0.034153   | 9.619589  | 0.38883    | 0.247706   | 0.39400107  | 5.284785466  |
| Rattus_norvegici | 72   | 47   | 68   | 30    | 18    | 24    | 0.445815   | 0.285445   | 0.421488   | 0.148619  | 0.109106   | 0.149769   | 0.120058413 | -1.533036506 |
| Rattus_norvegici | 101  | 78   | 82   | 49    | 66    | 57    | 1.298755   | 0.984761   | 1.049486   | 0.500515  | 0.863937   | 0.740146   | 0.634609783 | -0.712450584 |
| Rattus_norvegici | 413  | 427  | 564  | 285   | 169   | 103   | 1.369251   | 1.442857   | 1.894783   | 1.228524  | 1.337479   | 0.864757   | 0.116086835 | -1.516283315 |
| Rattus_norvegici | 304  | 394  | 410  | 161   | 66    | 57    | 1.305137   | 1.307181   | 1.295598   | 0.422292  | 0.184781   | 0.2115     | 0.02686169  | -2.162720781 |
| Rattus_norvegici | 45   | 48   | 49   | 31    | 12    | 17    | 0.65712    | 0.679611   | 0.715328   | 0.353308  | 0.176887   | 0.241258   | 0.121204831 | -1.426987303 |
| Rattus_norvegici | 478  | 404  | 544  | 730   | 229   | 570   | 5.565123   | 4.589125   | 6.324061   | 6.735854  | 2.718515   | 6.734657   | 0.984894625 | -0.0758274   |
| Rattus_norvegici | 125  | 184  | 223  | 242   | 246   | 270   | 2.178729   | 2.827037   | 3.709478   | 3.284524  | 4.176933   | 4.466604   | 0.851180294 | 0.387130783  |
| Rattus_norvegici | 45   | 50   | 37   | 45    | 65    | 29    | 0.568989   | 0.691146   | 0.524996   | 0.454555  | 0.955998   | 0.404935   | 0.98272243  | -0.04171047  |
| Rattus_norvegici | 237  | 258  | 256  | 292   | 219   | 289   | 1.407329   | 1.416103   | 1.405121   | 1.302012  | 1.226532   | 1.656419   | 0.986350447 | -0.045151386 |
| Rattus_norvegici | 323  | 480  | 329  | 376   | 422   | 334   | 1.95367    | 2.838117   | 1.990141   | 1.804185  | 2.813227   | 2.052309   | 0.947676068 | -0.119942761 |

|                  |       |       |       |      |      |      |           |           |           |           |           |           |             |              |
|------------------|-------|-------|-------|------|------|------|-----------|-----------|-----------|-----------|-----------|-----------|-------------|--------------|
| Rattus_norvegici | 88    | 49    | 214   | 3    | 6    | 6    | 0.468699  | 0.252037  | 1.145723  | 0.011367  | 0.032353  | 0.032143  | 0.018483962 | -4.647916833 |
| Rattus_norvegici | 416   | 315   | 379   | 300  | 140  | 167  | 14.848781 | 10.959057 | 13.522775 | 8.485339  | 5.114567  | 6.039742  | 0.382036677 | -1.049008245 |
| Rattus_norvegici | 314   | 423   | 350   | 334  | 228  | 249  | 2.682923  | 3.013175  | 3.209767  | 1.875955  | 1.718006  | 2.067196  | 0.694462023 | -0.570534017 |
| Rattus_norvegici | 96    | 227   | 127   | 84   | 7    | 36   | 0.949398  | 2.237074  | 1.274798  | 0.667287  | 0.070935  | 0.364457  | 0.072330348 | -2.050750482 |
| Rattus_norvegici | 113   | 115   | 123   | 222  | 134  | 65   | 3.152087  | 3.154799  | 3.456837  | 4.941968  | 3.853549  | 1.829189  | 0.967572088 | 0.0777091    |
| Rattus_norvegici | 88    | 50    | 109   | 52   | 62   | 88   | 0.985105  | 0.370718  | 1.26496   | 0.468044  | 0.791873  | 0.864615  | 0.830536218 | -0.401778891 |
| Rattus_norvegici | 116   | 0     | 77    | 248  | 39   | 61   | 1.751582  | 0         | 1.755583  | 2.98789   | 0.741804  | 1.07693   | 0.814859692 | 0.5898536    |
| Rattus_norvegici | 65    | 124   | 33    | 202  | 90   | 70   | 0.269019  | 0.506687  | 0.135946  | 0.669182  | 0.384077  | 0.296317  | 0.759681198 | 0.522945733  |
| Rattus_norvegici | 122   | 200   | 48    | 154  | 23   | 29   | 0.84744   | 1.486206  | 0.301373  | 0.698606  | 0.108952  | 0.139288  | 0.591656566 | -1.090888572 |
| Rattus_norvegici | 99    | 117   | 111   | 9    | 40   | 23   | 0.594386  | 0.573964  | 0.738599  | 0.032187  | 0.201833  | 0.113182  | 0.019461119 | -2.24278587  |
| Rattus_norvegici | 181   | 205   | 224   | 77   | 21   | 29   | 1.636821  | 1.743002  | 2.017226  | 0.577719  | 0.171238  | 0.242689  | 0.020961184 | -2.477355289 |
| Rattus_norvegici | 45    | 45    | 44    | 71   | 59   | 50   | 0.990842  | 0.967855  | 0.964638  | 1.257886  | 1.337942  | 1.133755  | 0.891635385 | 0.282230115  |
| Rattus_norvegici | 669   | 721   | 733   | 841  | 643  | 715  | 3.782567  | 3.968449  | 4.130368  | 3.794203  | 3.660368  | 3.993495  | 0.958955057 | -0.090511787 |
| Rattus_norvegici | 702   | 681   | 670   | 894  | 578  | 770  | 5.879447  | 5.56691   | 5.6107    | 5.939064  | 4.953038  | 6.542836  | 0.995472976 | -0.019710839 |
| Rattus_norvegici | 76    | 92    | 73    | 38   | 57   | 40   | 1.256162  | 1.621047  | 1.158713  | 0.528891  | 0.947675  | 0.713431  | 0.466149849 | -0.941760324 |
| Rattus_norvegici | 232   | 182   | 207   | 135  | 221  | 142  | 9.386136  | 7.16904   | 8.372618  | 4.335552  | 9.123157  | 5.80797   | 0.810234791 | -0.424428488 |
| Rattus_norvegici | 839   | 1456  | 389   | 1182 | 619  | 1171 | 1.484823  | 2.392529  | 1.155094  | 2.654609  | 1.928269  | 2.014127  | 1           | 0.011492771  |
| Rattus_norvegici | 97    | 245   | 23    | 96   | 16   | 58   | 0.24211   | 0.598901  | 0.055651  | 0.190957  | 0.041043  | 0.145861  | 0.625029369 | -1.284921501 |
| Rattus_norvegici | 2715  | 11205 | 2376  | 2311 | 798  | 370  | 5.421877  | 15.420821 | 3.686788  | 2.476693  | 1.841046  | 0.709612  | 0.33286835  | -2.439320441 |
| Rattus_norvegici | 101   | 235   | 163   | 25   | 63   | 18   | 0.579213  | 1.315537  | 0.934066  | 0.109283  | 0.369306  | 0.099609  | 0.023012792 | -2.320697955 |
| Rattus_norvegici | 1851  | 2018  | 1720  | 2585 | 2055 | 2637 | 26.317074 | 27.99218  | 24.434542 | 29.145874 | 29.884192 | 38.037006 | 0.762562412 | 0.24903341   |
| Rattus_norvegici | 195   | 279   | 222   | 337  | 287  | 378  | 0.867914  | 1.211692  | 0.985881  | 1.189173  | 1.30916   | 1.708593  | 0.828992189 | 0.400714153  |
| Rattus_norvegici | 63    | 55    | 54    | 64   | 64   | 88   | 0.581999  | 0.500846  | 0.495085  | 0.4714    | 0.6063    | 0.832627  | 0.940034892 | 0.212938789  |
| Rattus_norvegici | 678   | 611   | 750   | 871  | 400  | 388  | 3.223218  | 2.948749  | 3.631194  | 3.406904  | 1.948898  | 1.869481  | 0.695195654 | -0.485031105 |
| Rattus_norvegici | 1229  | 1357  | 1183  | 2335 | 1833 | 1486 | 25.222503 | 27.336772 | 23.984671 | 38.886039 | 38.743569 | 30.745304 | 0.513756941 | 0.437175384  |
| Rattus_norvegici | 27    | 37    | 74    | 27   | 63   | 95   | 0.418156  | 0.447587  | 0.876434  | 0.233684  | 0.979942  | 1.714562  | 0.900095725 | 0.343536475  |
| Rattus_norvegici | 301   | 215   | 415   | 549  | 450  | 704  | 0.788686  | 0.548781  | 1.087004  | 1.140428  | 1.207345  | 1.872067  | 0.507964557 | 0.740458682  |
| Rattus_norvegici | 10656 | 9146  | 10664 | 9642 | 6133 | 6216 | 27.087755 | 22.683167 | 27.087768 | 19.424066 | 15.949441 | 16.027478 | 0.218492789 | -0.630056968 |
| Rattus_norvegici | 325   | 301   | 446   | 209  | 172  | 200  | 0.909012  | 1.549754  | 1.535863  | 0.538261  | 0.853853  | 0.555311  | 0.379900446 | -1.022085787 |
| Rattus_norvegici | 174   | 114   | 144   | 192  | 86   | 155  | 1.049621  | 0.670509  | 0.868101  | 0.9202    | 0.53108   | 0.951911  | 0.961535834 | -0.160863935 |
| Rattus_norvegici | 84    | 121   | 76    | 21   | 35   | 28   | 0.492333  | 0.692846  | 0.445845  | 0.094374  | 0.20961   | 0.162714  | 0.066817198 | -1.836293717 |
| Rattus_norvegici | 11    | 26    | 25    | 130  | 113  | 119  | 0.101182  | 0.282653  | 0.430594  | 0.83204   | 1.320376  | 1.52051   | 0.014403302 | 2.412932813  |
| Rattus_norvegici | 47    | 45    | 76    | 81   | 35   | 35   | 1.267242  | 1.18462   | 2.063696  | 1.741984  | 0.961017  | 0.947428  | 0.885483171 | -0.348538001 |
| Rattus_norvegici | 252   | 219   | 313   | 228  | 348  | 502  | 4.038019  | 3.425742  | 5.022377  | 2.89457   | 5.711871  | 8.482383  | 0.860574936 | 0.365171594  |
| Rattus_norvegici | 410   | 637   | 395   | 759  | 493  | 567  | 1.430741  | 2.023583  | 1.594759  | 2.120947  | 1.725828  | 2.011375  | 0.906402803 | 0.188351985  |
| Rattus_norvegici | 52    | 9     | 51    | 4    | 109  | 151  | 0.578469  | 0.043282  | 0.257476  | 0.015923  | 0.929644  | 0.784759  | 0.650065843 | 1.191796813  |
| Rattus_norvegici | 919   | 2980  | 1930  | 6722 | 1652 | 2979 | 2.512452  | 8.324468  | 5.458236  | 14.983884 | 4.715136  | 8.551308  | 0.559159364 | 0.759213659  |
| Rattus_norvegici | 168   | 108   | 215   | 13   | 60   | 27   | 2.369507  | 1.433147  | 3.016974  | 0.124312  | 0.816471  | 0.355999  | 0.019170772 | -2.36295599  |
| Rattus_norvegici | 560   | 593   | 728   | 1281 | 956  | 1034 | 24.048304 | 24.848169 | 31.217413 | 43.617523 | 42.022705 | 45.044643 | 0.391652884 | 0.652277275  |
| Rattus_norvegici | 139   | 120   | 211   | 239  | 132  | 142  | 1.445059  | 1.221077  | 2.204574  | 1.975258  | 1.412374  | 1.500486  | 0.997665379 | -0.046535979 |
| Rattus_norvegici | 158   | 169   | 86    | 131  | 60   | 53   | 2.219474  | 2.319341  | 1.198148  | 1.453492  | 0.856791  | 0.74828   | 0.549989628 | -0.94211069  |
| Rattus_norvegici | 226   | 428   | 35    | 176  | 4    | 15   | 0.711822  | 1.328334  | 0.108011  | 0.441152  | 0.010928  | 0.047989  | 0.420933368 | -2.115460435 |
| Rattus_norvegici | 179   | 284   | 146   | 229  | 182  | 137  | 0.864628  | 1.610939  | 1.015631  | 1.123617  | 1.104101  | 0.670097  | 0.893331723 | -0.295752864 |
| Rattus_norvegici | 984   | 2532  | 365   | 340  | 931  | 133  | 3.769703  | 7.420718  | 1.463728  | 1.165783  | 4.368955  | 0.634355  | 0.48783697  | -1.539973758 |
| Rattus_norvegici | 749   | 451   | 417   | 776  | 720  | 460  | 3.365015  | 1.744024  | 1.710949  | 2.682805  | 2.861022  | 1.777339  | 0.938153588 | 0.131447367  |
| Rattus_norvegici | 49    | 14    | 37    | 89   | 115  | 188  | 1.111259  | 0.292148  | 0.839555  | 1.623429  | 2.685739  | 4.381196  | 0.094540785 | 1.867456978  |
| Rattus_norvegici | 237   | 156   | 173   | 416  | 349  | 521  | 1.18303   | 0.796178  | 0.862157  | 1.730227  | 1.889775  | 2.745356  | 0.346617051 | 1.058471315  |
| Rattus_norvegici | 68    | 52    | 42    | 136  | 89   | 164  | 0.978587  | 0.893727  | 0.683292  | 1.574993  | 2.215012  | 3.028988  | 0.401535734 | 1.132258904  |
| Rattus_norvegici | 54    | 113   | 41    | 24   | 287  | 404  | 0.698657  | 1.281932  | 0.860544  | 0.358184  | 1.739238  | 2.594501  | 0.441818358 | 1.753626984  |
| Rattus_norvegici | 37    | 59    | 54    | 34   | 76   | 39   | 0.874105  | 1.426589  | 1.198555  | 0.685363  | 2.112749  | 1.072304  | 0.955280883 | -0.098914451 |
| Rattus_norvegici | 92    | 75    | 74    | 159  | 156  | 225  | 0.869698  | 0.696659  | 0.696866  | 1.199926  | 1.517663  | 2.166997  | 0.469591361 | 1.048485307  |

|                  |      |      |      |      |      |      |           |           |           |           |           |           |             |              |
|------------------|------|------|------|------|------|------|-----------|-----------|-----------|-----------|-----------|-----------|-------------|--------------|
| Rattus_norvegici | 232  | 430  | 136  | 183  | 176  | 132  | 1.24808   | 2.254143  | 0.728602  | 0.776424  | 0.967686  | 0.719081  | 0.548519323 | -0.82564895  |
| Rattus_norvegici | 37   | 32   | 51   | 40   | 49   | 148  | 0.702358  | 0.566814  | 0.934077  | 0.581232  | 0.918809  | 2.783776  | 0.690181477 | 0.895662004  |
| Rattus_norvegici | 310  | 444  | 494  | 356  | 284  | 178  | 3.644679  | 2.79619   | 3.992361  | 3.759019  | 2.78897   | 2.190597  | 0.540171309 | -0.765774511 |
| Rattus_norvegici | 46   | 48   | 14   | 106  | 127  | 87   | 0.725265  | 0.71574   | 0.232795  | 1.404889  | 2.145349  | 1.673048  | 0.220409493 | 1.45314063   |
| Rattus_norvegici | 55   | 62   | 35   | 204  | 121  | 104  | 0.142565  | 0.156582  | 0.089548  | 0.422456  | 0.323225  | 0.274268  | 0.276970527 | 1.333042319  |
| Rattus_norvegici | 74   | 142  | 94   | 39   | 11   | 19   | 3.401632  | 4.558451  | 1.230092  | 1.087234  | 0.365076  | 0.197668  | 0.018228194 | -2.362489961 |
| Rattus_norvegici | 21   | 67   | 28   | 146  | 654  | 269  | 0.146965  | 0.564233  | 0.135834  | 0.794761  | 6.852245  | 3.705918  | 0.138837675 | 3.152898092  |
| Rattus_norvegici | 124  | 118  | 137  | 47   | 104  | 62   | 0.514298  | 0.475827  | 0.569068  | 0.154264  | 0.440442  | 0.260374  | 0.506579294 | -0.921850434 |
| Rattus_norvegici | 2597 | 2797 | 2634 | 3809 | 2412 | 1288 | 70.19104  | 73.753357 | 71.121826 | 81.609688 | 66.677872 | 35.28894  | 0.754504041 | -0.27355391  |
| Rattus_norvegici | 208  | 302  | 220  | 151  | 325  | 194  | 2.090348  | 3.069813  | 2.192921  | 1.306744  | 3.673306  | 2.10904   | 0.902148454 | -0.21052729  |
| Rattus_norvegici | 33   | 54   | 15   | 144  | 202  | 138  | 0.189752  | 0.308202  | 0.083406  | 0.672341  | 1.222981  | 0.825476  | 0.048900685 | 2.145336579  |
| Rattus_norvegici | 66   | 39   | 153  | 86   | 13   | 32   | 0.73242   | 0.416285  | 1.710397  | 0.758541  | 0.147407  | 0.353903  | 0.563154547 | -1.221192288 |
| Rattus_norvegici | 119  | 74   | 95   | 0    | 110  | 9    | 0.685425  | 0.413193  | 0.546268  | 0         | 0.646055  | 0.051984  | 0.325268152 | -1.294243806 |
| Rattus_norvegici | 62   | 82   | 119  | 98   | 83   | 90   | 1.173891  | 1.877473  | 2.501711  | 1.469551  | 1.769556  | 2.067091  | 0.973880861 | -0.09539472  |
| Rattus_norvegici | 183  | 63   | 96   | 296  | 23   | 648  | 0.464874  | 0.15602   | 0.242672  | 0.759764  | 0.058703  | 1.671017  | 0.648982804 | 1.370128662  |
| Rattus_norvegici | 60   | 20   | 39   | 44   | 175  | 157  | 0.921051  | 0.256286  | 0.372818  | 0.332755  | 2.200316  | 2.185719  | 0.280491933 | 1.594042359  |
| Rattus_norvegici | 133  | 105  | 165  | 207  | 145  | 202  | 0.978189  | 0.791958  | 1.615311  | 1.670109  | 2.004905  | 1.934785  | 0.884453868 | 0.315189723  |
| Rattus_norvegici | 52   | 0    | 91   | 104  | 0    | 65   | 0.507655  | 0         | 0.8878    | 0.80901   | 0         | 0.63973   | 0.984394648 | 0.001452531  |
| Rattus_norvegici | 35   | 37   | 17   | 212  | 69   | 154  | 0.215164  | 0.343839  | 0.15126   | 1.294996  | 0.738948  | 1.133513  | 0.040108776 | 2.119690357  |
| Rattus_norvegici | 348  | 497  | 469  | 485  | 532  | 417  | 1.469499  | 2.045865  | 1.979491  | 1.621062  | 2.294656  | 1.782829  | 0.996553817 | 0.000927013  |
| Rattus_norvegici | 183  | 191  | 211  | 227  | 134  | 108  | 3.42657   | 3.487759  | 3.942624  | 3.370579  | 2.562678  | 2.037294  | 0.811826341 | -0.491544737 |
| Rattus_norvegici | 1240 | 1231 | 1242 | 1164 | 918  | 890  | 5.983508  | 4.55313   | 6.042556  | 4.551711  | 4.507277  | 4.40196   | 0.549208949 | -0.464675824 |
| Rattus_norvegici | 186  | 0    | 155  | 210  | 0    | 149  | 2.083485  | 0         | 1.734958  | 1.86559   | 0         | 1.692499  | 0.988681736 | -0.150921312 |
| Rattus_norvegici | 31   | 17   | 31   | 127  | 91   | 123  | 0.387232  | 0.198986  | 0.386945  | 1.270495  | 1.175641  | 1.570689  | 0.056587629 | 1.965351647  |
| Rattus_norvegici | 269  | 290  | 181  | 94   | 136  | 143  | 1.832149  | 2.230797  | 1.442844  | 0.516784  | 1.04601   | 0.834681  | 0.376778378 | -1.085068633 |
| Rattus_norvegici | 12   | 12   | 7    | 352  | 45   | 75   | 0.107701  | 0.10508   | 0.067868  | 2.707248  | 0.444148  | 0.730304  | 0.171864581 | 3.674633155  |
| Rattus_norvegici | 51   | 136  | 38   | 93   | 264  | 68   | 1.423707  | 3.745511  | 1.057876  | 2.075377  | 7.624245  | 1.93638   | 0.75643102  | 0.846304016  |
| Rattus_norvegici | 230  | 589  | 323  | 571  | 783  | 437  | 2.940235  | 7.364655  | 4.126094  | 5.804672  | 10.263734 | 5.679097  | 0.672446833 | 0.538198598  |
| Rattus_norvegici | 84   | 124  | 194  | 21   | 126  | 47   | 1.208048  | 1.761312  | 2.799891  | 0.235666  | 1.862441  | 0.687543  | 0.371825527 | -1.109276097 |
| Rattus_norvegici | 110  | 51   | 49   | 10   | 36   | 26   | 0.717406  | 0.321711  | 0.313649  | 0.047296  | 0.236284  | 0.16757   | 0.109527286 | -1.610178843 |
| Rattus_norvegici | 335  | 270  | 324  | 479  | 523  | 774  | 3.824343  | 3.008317  | 3.68937   | 4.330096  | 6.101021  | 8.960917  | 0.442367858 | 0.824916528  |
| Rattus_norvegici | 666  | 927  | 662  | 1163 | 900  | 864  | 2.323045  | 3.419107  | 2.906552  | 4.405165  | 4.021684  | 3.359375  | 0.842431916 | 0.234888309  |
| Rattus_norvegici | 71   | 544  | 602  | 107  | 70   | 647  | 0.667386  | 4.931285  | 5.540317  | 0.813387  | 0.651997  | 6.161002  | 0.820724164 | -0.636653548 |
| Rattus_norvegici | 184  | 168  | 169  | 24   | 28   | 75   | 0.626739  | 0.555469  | 0.572002  | 0.06477   | 0.094493  | 0.257009  | 0.042411423 | -2.123385289 |
| Rattus_norvegici | 112  | 108  | 82   | 144  | 51   | 26   | 0.688562  | 0.65086   | 0.501832  | 0.70485   | 0.318656  | 0.156985  | 0.735706952 | -0.672823618 |
| Rattus_norvegici | 53   | 84   | 26   | 50   | 90   | 91   | 0.866645  | 1.351939  | 0.422241  | 0.645443  | 1.521667  | 1.527655  | 0.860574936 | 0.423728651  |
| Rattus_norvegici | 47   | 81   | 0    | 57   | 75   | 56   | 0.619431  | 1.050538  | 0         | 0.593841  | 1.011834  | 0.752645  | 0.838276302 | 0.459006838  |
| Rattus_norvegici | 782  | 986  | 1124 | 1012 | 1033 | 1136 | 5.989025  | 7.369652  | 8.475626  | 6.129837  | 7.95676   | 8.666655  | 1           | 0.014775275  |
| Rattus_norvegici | 1203 | 1260 | 938  | 1469 | 918  | 1084 | 10.019275 | 11.769055 | 8.251083  | 9.686562  | 8.471426  | 10.10358  | 0.93085529  | -0.121771523 |
| Rattus_norvegici | 62   | 36   | 88   | 69   | 148  | 46   | 0.817056  | 0.435581  | 1.163918  | 0.411796  | 2.482688  | 0.415902  | 0.868219444 | 0.39216342   |
| Rattus_norvegici | 797  | 1122 | 943  | 988  | 529  | 546  | 6.638311  | 11.637439 | 10.582349 | 8.546044  | 4.880229  | 4.772405  | 0.447598019 | -0.641139285 |
| Rattus_norvegici | 421  | 520  | 220  | 483  | 379  | 432  | 12.059646 | 14.533906 | 6.285779  | 10.971409 | 11.10128  | 12.557034 | 0.996253362 | 0.025936794  |
| Rattus_norvegici | 100  | 74   | 83   | 83   | 68   | 69   | 1.005759  | 0.685456  | 1.011353  | 0.583791  | 0.779714  | 0.734294  | 0.864874889 | -0.364692726 |
| Rattus_norvegici | 243  | 78   | 278  | 110  | 205  | 323  | 4.321714  | 1.343436  | 4.956079  | 1.5706    | 3.76333   | 5.774191  | 0.988681736 | 0.001003938  |
| Rattus_norvegici | 147  | 132  | 127  | 149  | 90   | 177  | 0.733012  | 0.91423   | 0.632905  | 0.588014  | 0.459399  | 0.898818  | 0.972531116 | -0.10059736  |
| Rattus_norvegici | 207  | 116  | 147  | 471  | 189  | 400  | 1.269266  | 0.830288  | 1.077169  | 1.72649   | 0.698477  | 2.351368  | 0.395770238 | 1.008290343  |
| Rattus_norvegici | 115  | 115  | 97   | 223  | 130  | 211  | 1.611506  | 1.886114  | 1.639417  | 2.396903  | 1.809271  | 2.14983   | 0.704115909 | 0.64140929   |
| Rattus_norvegici | 299  | 443  | 397  | 439  | 356  | 384  | 1.47986   | 1.514898  | 2.064038  | 2.027701  | 1.546268  | 1.346815  | 0.969525871 | -0.086628191 |
| Rattus_norvegici | 70   | 2    | 48   | 46   | 47   | 30   | 0.655818  | 0.011781  | 0.455653  | 0.346009  | 0.451471  | 0.284981  | 0.976211798 | -0.113201719 |
| Rattus_norvegici | 312  | 290  | 397  | 406  | 310  | 292  | 7.418651  | 6.718042  | 9.680109  | 7.570244  | 7.45284   | 6.951388  | 0.956802198 | -0.137054146 |
| Rattus_norvegici | 171  | 167  | 176  | 158  | 124  | 84   | 0.928037  | 0.884109  | 0.949915  | 0.678594  | 0.687799  | 0.461669  | 0.715054484 | -0.64501254  |

|                  |      |      |      |      |      |      |           |          |           |           |           |           |             |              |
|------------------|------|------|------|------|------|------|-----------|----------|-----------|-----------|-----------|-----------|-------------|--------------|
| Rattus_norvegici | 233  | 151  | 267  | 61   | 17   | 45   | 9.193264  | 5.809346 | 10.532828 | 1.901699  | 0.662036  | 1.799583  | 0.013206099 | -2.588898584 |
| Rattus_norvegici | 385  | 299  | 197  | 797  | 176  | 149  | 1.384302  | 0.928048 | 1.501888  | 2.090176  | 0.564741  | 0.601459  | 0.943130353 | 0.106568899  |
| Rattus_norvegici | 1202 | 476  | 1001 | 1014 | 263  | 284  | 21.147857 | 8.01165  | 17.472059 | 15.308789 | 5.171571  | 5.643948  | 0.419352733 | -1.011599367 |
| Rattus_norvegici | 108  | 110  | 108  | 112  | 34   | 45   | 1.585706  | 1.567372 | 1.571484  | 1.304336  | 0.507073  | 0.661635  | 0.534209291 | -0.97710698  |
| Rattus_norvegici | 93   | 99   | 85   | 106  | 56   | 73   | 0.57728   | 0.596619 | 0.525751  | 0.519562  | 0.683085  | 0.458435  | 0.859735624 | -0.398738739 |
| Rattus_norvegici | 148  | 139  | 196  | 233  | 152  | 177  | 1.363557  | 1.233518 | 1.779444  | 1.628636  | 1.300735  | 1.663658  | 0.97893385  | 0.063730179  |
| Rattus_norvegici | 239  | 178  | 378  | 145  | 167  | 90   | 4.214369  | 3.065531 | 6.699763  | 2.041611  | 3.034205  | 1.596702  | 0.370514465 | -1.122837423 |
| Rattus_norvegici | 704  | 383  | 848  | 296  | 164  | 321  | 8.953883  | 4.91876  | 10.874884 | 3.574131  | 2.069101  | 5.223535  | 0.071092894 | -1.45872951  |
| Rattus_norvegici | 83   | 40   | 116  | 143  | 143  | 108  | 0.715822  | 0.367062 | 1.341355  | 1.085754  | 1.282312  | 1.034852  | 0.749349217 | 0.577873639  |
| Rattus_norvegici | 1    | 7    | 47   | 25   | 97   | 57   | 0.003627  | 0.031223 | 0.236505  | 0.099689  | 0.49616   | 0.287606  | 0.432727739 | 1.616580784  |
| Rattus_norvegici | 343  | 459  | 504  | 252  | 173  | 181  | 5.055921  | 6.597686 | 7.415271  | 2.94347   | 2.596673  | 2.706058  | 0.217706998 | -1.25984095  |
| Rattus_norvegici | 47   | 27   | 59   | 96   | 144  | 37   | 0.459281  | 0.257777 | 0.571908  | 0.738358  | 1.434384  | 0.360301  | 0.542768423 | 0.926440977  |
| Rattus_norvegici | 52   | 5    | 64   | 15   | 59   | 22   | 0.828796  | 0.06401  | 1.021319  | 0.199965  | 1.148025  | 0.434554  | 0.872044061 | -0.416657691 |
| Rattus_norvegici | 238  | 373  | 522  | 342  | 223  | 366  | 1.332592  | 2.017081 | 2.88073   | 1.526862  | 1.252996  | 2.395547  | 0.787812883 | -0.425011335 |
| Rattus_norvegici | 177  | 129  | 241  | 257  | 92   | 188  | 0.973065  | 0.692912 | 1.324031  | 1.121645  | 0.515638  | 1.048689  | 0.948049295 | -0.206053978 |
| Rattus_norvegici | 49   | 5    | 34   | 65   | 65   | 40   | 0.655517  | 0.055722 | 0.488429  | 0.694721  | 1.041026  | 0.545932  | 0.522771806 | 0.800397093  |
| Rattus_norvegici | 126  | 145  | 141  | 205  | 30   | 69   | 3.252639  | 3.878163 | 3.409283  | 4.172801  | 0.724376  | 1.705904  | 0.749349217 | -0.673937313 |
| Rattus_norvegici | 521  | 795  | 520  | 505  | 317  | 447  | 2.87535   | 5.181073 | 2.897028  | 2.747899  | 2.251463  | 3.176718  | 0.5182834   | -0.674968536 |
| Rattus_norvegici | 1094 | 879  | 794  | 815  | 645  | 1138 | 1.332554  | 0.893627 | 0.82663   | 0.673447  | 0.687552  | 1.203547  | 0.842151614 | -0.212266845 |
| Rattus_norvegici | 258  | 281  | 60   | 89   | 234  | 103  | 1.357717  | 1.621249 | 0.266398  | 0.42928   | 1.363861  | 0.687435  | 0.724626672 | -0.564700555 |
| Rattus_norvegici | 62   | 82   | 57   | 75   | 36   | 65   | 0.652561  | 1.041087 | 0.629843  | 0.803084  | 0.493444  | 0.559026  | 0.872044061 | -0.3441991   |
| Rattus_norvegici | 94   | 49   | 116  | 69   | 3    | 181  | 0.835567  | 0.420131 | 1.031149  | 0.486476  | 0.018463  | 1.643128  | 0.965596753 | -0.158180736 |
| Rattus_norvegici | 207  | 240  | 488  | 178  | 236  | 187  | 0.961906  | 1.089385 | 2.267801  | 0.656684  | 1.119669  | 0.878839  | 0.567150711 | -0.75857823  |
| Rattus_norvegici | 146  | 78   | 57   | 70   | 38   | 34   | 1.266599  | 0.660551 | 0.495957  | 0.479542  | 0.331143  | 0.299418  | 0.38041344  | -1.15790503  |
| Rattus_norvegici | 307  | 301  | 352  | 215  | 51   | 40   | 1.662243  | 1.592095 | 1.906697  | 0.921639  | 0.277716  | 0.21996   | 0.083010745 | -1.893871575 |
| Rattus_norvegici | 57   | 87   | 102  | 84   | 100  | 48   | 0.422642  | 0.628974 | 0.758212  | 0.492992  | 0.76101   | 0.358335  | 0.928420663 | -0.217528781 |
| Rattus_norvegici | 81   | 145  | 52   | 44   | 36   | 11   | 0.601073  | 0.96535  | 0.612345  | 0.234305  | 0.245885  | 0.074205  | 0.094847728 | -1.769255491 |
| Rattus_norvegici | 333  | 254  | 290  | 360  | 346  | 306  | 2.359644  | 1.799299 | 1.90197   | 1.534376  | 1.910008  | 1.650046  | 0.979098028 | 0.073200588  |
| Rattus_norvegici | 91   | 86   | 89   | 89   | 0    | 59   | 1.110821  | 1.026678 | 1.090438  | 0.860903  | 0         | 0.728349  | 0.465626242 | -1.061825402 |
| Rattus_norvegici | 187  | 185  | 196  | 155  | 110  | 81   | 1.668248  | 2.144577 | 2.074758  | 1.86236   | 1.458345  | 0.893887  | 0.569852213 | -0.875689169 |
| Rattus_norvegici | 90   | 95   | 151  | 91   | 71   | 89   | 0.710559  | 0.736462 | 1.200054  | 0.573059  | 0.574229  | 0.717085  | 0.761643392 | -0.561194125 |
| Rattus_norvegici | 100  | 111  | 156  | 104  | 126  | 105  | 0.429044  | 0.464942 | 0.670312  | 0.3524    | 0.553154  | 0.456998  | 0.910382209 | -0.252975451 |
| Rattus_norvegici | 75   | 79   | 49   | 65   | 124  | 72   | 1.03228   | 1.050882 | 0.66473   | 0.702067  | 1.743634  | 1.001458  | 0.928152729 | 0.269553998  |
| Rattus_norvegici | 1758 | 375  | 524  | 252  | 2075 | 901  | 9.692477  | 2.618271 | 4.405618  | 1.43775   | 10.619364 | 4.900962  | 0.972768214 | 0.233058799  |
| Rattus_norvegici | 142  | 148  | 162  | 80   | 113  | 146  | 2.551665  | 2.543679 | 2.994489  | 1.006595  | 2.127664  | 2.716984  | 0.766232356 | -0.513287012 |
| Rattus_norvegici | 68   | 58   | 110  | 69   | 50   | 47   | 0.515348  | 0.42757  | 0.893438  | 0.72035   | 0.38746   | 0.364461  | 0.688759028 | -0.664995341 |
| Rattus_norvegici | 53   | 49   | 70   | 22   | 18   | 26   | 0.497626  | 0.454385 | 0.657666  | 0.160225  | 0.16672   | 0.250262  | 0.107810936 | -1.512731075 |
| Rattus_norvegici | 168  | 204  | 140  | 269  | 132  | 194  | 0.651191  | 0.7685   | 0.540852  | 0.827095  | 0.523391  | 0.762553  | 0.979552253 | 0.056797532  |
| Rattus_norvegici | 397  | 203  | 1131 | 51   | 30   | 15   | 2.045454  | 1.011528 | 5.653841  | 0.247094  | 0.195271  | 0.075846  | 0.069560101 | -4.373831406 |
| Rattus_norvegici | 414  | 351  | 450  | 686  | 403  | 320  | 1.046768  | 0.973267 | 1.26232   | 1.380191  | 0.882889  | 0.668864  | 0.973880861 | 0.038616107  |
| Rattus_norvegici | 258  | 113  | 284  | 309  | 96   | 145  | 1.848383  | 0.849682 | 2.315027  | 1.461183  | 0.508592  | 1.019414  | 0.839425547 | -0.458784771 |
| Rattus_norvegici | 3215 | 1636 | 762  | 3335 | 1518 | 934  | 18.646953 | 8.599779 | 2.985158  | 13.383396 | 10.073693 | 4.979128  | 0.972592817 | -0.152489367 |
| Rattus_norvegici | 2005 | 1267 | 3057 | 5176 | 2526 | 2310 | 10.541132 | 7.022301 | 15.907299 | 22.561516 | 14.151367 | 12.158523 | 0.581644503 | 0.470424146  |
| Rattus_norvegici | 79   | 102  | 86   | 118  | 41   | 101  | 0.266684  | 0.339117 | 0.292093  | 0.318575  | 0.142497  | 0.349305  | 0.946648348 | -0.202436612 |
| Rattus_norvegici | 76   | 116  | 92   | 75   | 69   | 31   | 0.614647  | 0.922825 | 0.7498    | 0.48063   | 0.573429  | 0.249456  | 0.573544689 | -0.847846518 |
| Rattus_norvegici | 36   | 25   | 18   | 116  | 60   | 61   | 0.34003   | 0.228985 | 0.164879  | 0.862789  | 0.57267   | 0.581226  | 0.169829739 | 1.413044549  |
| Rattus_norvegici | 51   | 55   | 42   | 120  | 42   | 40   | 0.429547  | 0.455007 | 0.352433  | 0.808547  | 0.364871  | 0.340945  | 0.883637388 | 0.243878829  |
| Rattus_norvegici | 190  | 243  | 113  | 489  | 277  | 451  | 1.494416  | 1.590471 | 0.903041  | 2.658624  | 1.723918  | 3.282729  | 0.380223683 | 1.015038981  |
| Rattus_norvegici | 430  | 433  | 258  | 244  | 58   | 94   | 1.737713  | 1.426747 | 0.912208  | 0.645982  | 0.195806  | 0.317161  | 0.102126325 | -1.712704277 |
| Rattus_norvegici | 250  | 501  | 122  | 510  | 88   | 74   | 1.546525  | 1.584767 | 0.375357  | 1.25695   | 0.321159  | 0.238255  | 0.843763249 | -0.625753737 |
| Rattus_norvegici | 2    | 0    | 61   | 0    | 128  | 162  | 0.044321  | 0        | 1.709534  | 0         | 3.659903  | 4.609913  | 0.432890412 | 2.145644468  |

|                  |       |       |       |       |       |       |            |            |            |            |            |            |             |              |
|------------------|-------|-------|-------|-------|-------|-------|------------|------------|------------|------------|------------|------------|-------------|--------------|
| Rattus_norvegici | 49    | 89    | 27    | 255   | 25    | 20    | 0.383736   | 0.774401   | 0.189854   | 1.524221   | 0.131908   | 0.086518   | 0.861502576 | 0.58139      |
| Rattus_norvegici | 33    | 18    | 50    | 135   | 257   | 1165  | 0.168157   | 0.098127   | 0.291247   | 0.626458   | 1.523985   | 6.813413   | 0.277636197 | 3.877317951  |
| Rattus_norvegici | 227   | 26    | 47    | 95    | 38    | 42    | 0.899755   | 0.098176   | 0.184566   | 0.297955   | 0.150746   | 0.168509   | 0.786675003 | -0.972658879 |
| Rattus_norvegici | 0     | 227   | 326   | 0     | 57    | 74    | 0          | 0.82406    | 0.712645   | 0          | 0.126795   | 0.162415   | 0.372147035 | -2.110732232 |
| Rattus_norvegici | 286   | 207   | 225   | 1285  | 306   | 257   | 6.856789   | 4.869966   | 5.402339   | 24.553985  | 7.549552   | 6.295012   | 0.53118726  | 1.122420816  |
| Rattus_norvegici | 160   | 172   | 154   | 4868  | 268   | 267   | 0.923581   | 0.969017   | 0.88057    | 23.533901  | 1.860438   | 1.794766   | 0.522705934 | 3.16517214   |
| Rattus_norvegici | 1786  | 1163  | 1928  | 1397  | 2250  | 674   | 82.853139  | 11.620601  | 90.143608  | 51.218891  | 106.048661 | 6.99773    | 0.827740296 | -0.297306738 |
| Rattus_norvegici | 971   | 793   | 268   | 519   | 0     | 127   | 18.315841  | 14.510323  | 5.057848   | 7.758858   | 0          | 2.411031   | 0.18180234  | -1.925830859 |
| Rattus_norvegici | 16    | 297   | 218   | 22    | 103   | 140   | 0.046655   | 0.930844   | 0.699149   | 0.052823   | 0.317896   | 0.428909   | 0.600485235 | -1.049823102 |
| Rattus_norvegici | 55    | 62    | 31    | 49    | 49    | 24    | 0.498135   | 0.543035   | 0.282524   | 0.350114   | 0.453404   | 0.216419   | 0.809803739 | -0.41630333  |
| Rattus_norvegici | 1525  | 1589  | 1372  | 2091  | 1580  | 1881  | 3.921994   | 3.986971   | 3.524236   | 4.262776   | 4.155177   | 4.906038   | 0.865851032 | 0.169420767  |
| Rattus_norvegici | 93    | 120   | 99    | 114   | 112   | 151   | 0.593589   | 0.750319   | 0.632358   | 0.57924    | 0.731372   | 0.982737   | 0.964192106 | 0.15770106   |
| Rattus_norvegici | 62    | 91    | 126   | 153   | 22    | 67    | 0.300852   | 0.433246   | 0.617857   | 0.595889   | 0.109663   | 0.332551   | 0.871169474 | -0.431469098 |
| Rattus_norvegici | 171   | 123   | 185   | 82    | 219   | 174   | 1.590413   | 1.110762   | 1.719845   | 0.600183   | 2.080326   | 1.641683   | 0.957420456 | -0.092179726 |
| Rattus_norvegici | 109   | 166   | 63    | 62    | 51    | 44    | 1.09018    | 1.630809   | 0.624158   | 0.488292   | 0.525605   | 0.44072    | 0.32489314  | -1.240782694 |
| Rattus_norvegici | 83    | 118   | 56    | 73    | 21    | 45    | 1.198612   | 1.668296   | 0.80366    | 0.831761   | 0.29904    | 0.650253   | 0.433743214 | -1.067114736 |
| Rattus_norvegici | 153   | 122   | 174   | 132   | 158   | 196   | 0.375408   | 0.289926   | 0.425663   | 0.255681   | 0.394436   | 0.486657   | 0.995472976 | 0.002815965  |
| Rattus_norvegici | 1478  | 1254  | 1659  | 1386  | 1126  | 760   | 7.686228   | 6.360943   | 8.620145   | 5.716191   | 5.990923   | 4.008679   | 0.386541184 | -0.579213206 |
| Rattus_norvegici | 297   | 157   | 333   | 133   | 96    | 47    | 6.83069    | 3.435721   | 7.459505   | 2.335563   | 2.238117   | 1.051722   | 0.136313641 | -1.68809084  |
| Rattus_norvegici | 387   | 211   | 480   | 333   | 215   | 343   | 1.957821   | 0.967116   | 2.133057   | 1.390146   | 1.100529   | 1.594712   | 0.799351374 | -0.422525741 |
| Rattus_norvegici | 52    | 69    | 38    | 59    | 14    | 66    | 0.664628   | 0.844555   | 0.469948   | 0.585211   | 0.175935   | 0.833346   | 0.864077268 | -0.346692602 |
| Rattus_norvegici | 176   | 203   | 0     | 96    | 0     | 63    | 1.35857    | 1.53192    | 0          | 0.587853   | 0          | 0.495339   | 0.572685337 | -1.453402659 |
| Rattus_norvegici | 35    | 18    | 34    | 200   | 57    | 87    | 1.095375   | 0.4317     | 0.854502   | 4.661878   | 1.634528   | 2.444461   | 0.080631542 | 1.772645422  |
| Rattus_norvegici | 67    | 59    | 85    | 70    | 24    | 15    | 1.640857   | 1.402141   | 2.082861   | 1.361318   | 0.585246   | 0.36969    | 0.358188954 | -1.17885745  |
| Rattus_norvegici | 3     | 153   | 31    | 50    | 191   | 128   | 0.02946    | 3.1418     | 0.506922   | 0.960821   | 5.028009   | 3.202726   | 0.737687264 | 0.937735954  |
| Rattus_norvegici | 60    | 64    | 131   | 28    | 26    | 16    | 0.639771   | 0.66941    | 1.391352   | 0.236028   | 0.280407   | 0.17308    | 0.039633898 | -2.017054234 |
| Rattus_norvegici | 7634  | 7914  | 8596  | 11804 | 9750  | 11596 | 98.260628  | 99.38974   | 110.557274 | 120.460075 | 128.385376 | 151.404633 | 0.6391876   | 0.323221871  |
| Rattus_norvegici | 93    | 49    | 113   | 123   | 56    | 60    | 0.779653   | 0.393681   | 0.939365   | 0.81493    | 0.479225   | 0.507236   | 0.923878281 | -0.283706184 |
| Rattus_norvegici | 96    | 189   | 159   | 103   | 55    | 33    | 0.519663   | 0.711084   | 1.187226   | 0.316155   | 0.215392   | 0.126087   | 0.280092038 | -1.402978681 |
| Rattus_norvegici | 600   | 430   | 61    | 601   | 345   | 419   | 4.741417   | 3.317529   | 0.480139   | 3.767343   | 2.788487   | 3.356124   | 0.931678986 | 0.173540512  |
| Rattus_norvegici | 81    | 60    | 85    | 102   | 60    | 83    | 0.392137   | 0.283707   | 0.413715   | 0.392071   | 0.297032   | 0.410038   | 0.996279092 | -0.039504238 |
| Rattus_norvegici | 92    | 59    | 76    | 58    | 40    | 55    | 0.81391    | 0.513514   | 0.677669   | 0.407242   | 0.357783   | 0.494244   | 0.643900083 | -0.712669615 |
| Rattus_norvegici | 50    | 10    | 77    | 11    | 89    | 73    | 1.294657   | 0.255145   | 2.022093   | 0.218105   | 2.373741   | 1.941033   | 0.954060745 | 0.277358344  |
| Rattus_norvegici | 3372  | 1197  | 2046  | 8685  | 2789  | 2717  | 20.516294  | 16.398135  | 12.445739  | 43.216583  | 17.536024  | 16.90894   | 0.486856726 | 0.883196969  |
| Rattus_norvegici | 2271  | 4504  | 1015  | 2032  | 320   | 250   | 15.725247  | 33.991994  | 9.503469   | 16.582672  | 7.847786   | 4.419566   | 0.309350207 | -1.837159812 |
| Rattus_norvegici | 177   | 309   | 1694  | 4     | 0     | 0     | 0.784733   | 1.509739   | 8.368793   | 0.009483   | 0          | 0          | 0.02550985  | -9.454306675 |
| Rattus_norvegici | 40    | 88    | 50    | 77    | 446   | 440   | 0.129384   | 0.278348   | 0.160601   | 0.19823    | 1.487279   | 1.452772   | 0.158440799 | 2.392623164  |
| Rattus_norvegici | 304   | 385   | 258   | 236   | 515   | 448   | 2.637863   | 3.881995   | 2.370495   | 1.563779   | 4.856736   | 4.60161    | 0.917764973 | 0.260873746  |
| Rattus_norvegici | 70    | 72    | 81    | 162   | 499   | 261   | 0.380559   | 0.784442   | 0.456425   | 0.91611    | 3.147865   | 1.457421   | 0.169829739 | 1.971686975  |
| Rattus_norvegici | 170   | 98    | 217   | 93    | 11    | 9     | 3.492183   | 1.915781   | 4.436402   | 1.508582   | 0.211632   | 0.167889   | 0.033725578 | -2.392827982 |
| Rattus_norvegici | 9521  | 8793  | 9019  | 10480 | 7719  | 8634  | 16.02867   | 14.456743  | 15.186232  | 13.989168  | 13.305876  | 14.759102  | 0.848518312 | -0.17061198  |
| Rattus_norvegici | 1588  | 1586  | 1395  | 1362  | 892   | 1336  | 10.693356  | 10.419277  | 9.386285   | 7.272972   | 6.145828   | 9.127112   | 0.473885636 | -0.488057755 |
| Rattus_norvegici | 240   | 348   | 278   | 275   | 249   | 219   | 7.233249   | 10.302482  | 8.389694   | 6.541298   | 7.716225   | 6.620302   | 0.843934894 | -0.354692928 |
| Rattus_norvegici | 339   | 370   | 444   | 275   | 211   | 228   | 2.63627    | 2.156456   | 2.25747    | 1.224407   | 1.198759   | 2.206234   | 0.497558767 | -0.835101361 |
| Rattus_norvegici | 5337  | 6091  | 3178  | 7712  | 6308  | 4802  | 148.205063 | 163.194851 | 103.550243 | 176.760376 | 183.450622 | 134.731594 | 0.760004002 | 0.223803579  |
| Rattus_norvegici | 1526  | 1587  | 1128  | 1304  | 634   | 581   | 4.899799   | 5.976008   | 3.687436   | 3.383873   | 1.713945   | 1.668303   | 0.117882346 | -0.931163369 |
| Rattus_norvegici | 949   | 1019  | 1003  | 492   | 418   | 193   | 4.151687   | 3.367655   | 3.111196   | 1.841915   | 2.016575   | 1.155059   | 0.011320804 | -1.587073074 |
| Rattus_norvegici | 12337 | 17381 | 14383 | 21697 | 18481 | 14804 | 397.539524 | 506.418022 | 436.299597 | 545.178494 | 602.039857 | 472.93179  | 0.859753991 | 0.17683373   |
| Rattus_norvegici | 1240  | 1214  | 1262  | 1128  | 448   | 554   | 3.111678   | 2.975653   | 3.296323   | 2.33834    | 1.1509     | 1.411529   | 0.117859512 | -0.990923562 |
| Rattus_norvegici | 87    | 52    | 58    | 35    | 4     | 9     | 2.988041   | 1.710961   | 1.962128   | 0.991245   | 0.121484   | 0.275935   | 0.011014073 | -2.292015894 |
| Rattus_norvegici | 70    | 132   | 58    | 83    | 13    | 11    | 0.841298   | 1.013134   | 0.686112   | 0.794206   | 0.076      | 0.092579   | 0.228285651 | -1.539399357 |

|                  |      |      |      |       |       |       |           |           |           |           |           |           |             |              |
|------------------|------|------|------|-------|-------|-------|-----------|-----------|-----------|-----------|-----------|-----------|-------------|--------------|
| Rattus_norvegici | 97   | 212  | 63   | 166   | 241   | 186   | 0.39736   | 0.853253  | 0.256653  | 0.544005  | 1.01656   | 0.779288  | 0.771947949 | 0.577214548  |
| Rattus_norvegici | 63   | 53   | 39   | 102   | 55    | 47    | 0.624606  | 0.552537  | 0.466335  | 0.677206  | 0.705151  | 0.506229  | 0.910178505 | 0.221847332  |
| Rattus_norvegici | 554  | 381  | 395  | 1136  | 805   | 947   | 24.462776 | 16.41341  | 17.438227 | 39.798111 | 36.397522 | 42.459705 | 0.183539825 | 0.97330874   |
| Rattus_norvegici | 120  | 113  | 272  | 33    | 87    | 50    | 0.664869  | 0.57324   | 1.513133  | 0.125258  | 0.514786  | 0.302312  | 0.148466464 | -1.660919337 |
| Rattus_norvegici | 380  | 705  | 518  | 2430  | 134   | 1448  | 1.502349  | 2.722228  | 2.046417  | 7.626587  | 0.538696  | 5.814953  | 0.537912805 | 1.111424444  |
| Rattus_norvegici | 54   | 59   | 56   | 78    | 47    | 52    | 0.532993  | 0.581922  | 0.581018  | 0.522109  | 0.402764  | 0.545858  | 0.980231989 | -0.091891562 |
| Rattus_norvegici | 141  | 252  | 66   | 134   | 191   | 110   | 1.462501  | 2.55025   | 0.679824  | 1.099164  | 2.02561   | 1.154837  | 0.93142015  | -0.180307467 |
| Rattus_norvegici | 11   | 26   | 13   | 260   | 48    | 52    | 0.134486  | 0.338367  | 0.167287  | 2.773764  | 0.662662  | 0.707716  | 0.251913175 | 2.606419748  |
| Rattus_norvegici | 146  | 149  | 222  | 140   | 353   | 113   | 1.363505  | 1.112864  | 1.464525  | 1.039501  | 2.976472  | 1.050849  | 0.973689773 | 0.135453898  |
| Rattus_norvegici | 348  | 262  | 298  | 394   | 206   | 218   | 0.916004  | 0.674355  | 0.783351  | 0.823924  | 0.555495  | 0.581762  | 0.878377777 | -0.323897931 |
| Rattus_norvegici | 69   | 65   | 80   | 171   | 122   | 94    | 0.924776  | 0.843441  | 1.071488  | 1.818709  | 1.666546  | 1.273996  | 0.663172685 | 0.694376683  |
| Rattus_norvegici | 63   | 31   | 23   | 33    | 501   | 255   | 0.863777  | 0.134123  | 0.178339  | 0.114794  | 2.894979  | 1.351054  | 0.295765191 | 2.719778107  |
| Rattus_norvegici | 300  | 224  | 174  | 205   | 99    | 99    | 1.281421  | 1.032085  | 0.684448  | 0.703142  | 0.709474  | 0.423055  | 0.505800869 | -0.970846727 |
| Rattus_norvegici | 59   | 98   | 72   | 76    | 71    | 60    | 1.335383  | 2.195534  | 1.653144  | 1.373397  | 1.652301  | 1.377709  | 0.898995335 | -0.27724673  |
| Rattus_norvegici | 92   | 59   | 122  | 156   | 217   | 227   | 0.513291  | 0.716198  | 0.681215  | 1.043354  | 1.645537  | 1.872774  | 0.482578865 | 1.025425073  |
| Rattus_norvegici | 109  | 114  | 175  | 197   | 129   | 186   | 1.191315  | 1.217025  | 1.912892  | 1.704628  | 1.444613  | 2.061057  | 0.928420663 | 0.215956588  |
| Rattus_norvegici | 72   | 75   | 0    | 691   | 159   | 56    | 1.111803  | 0.973949  | 0         | 9.049261  | 2.297358  | 1.061574  | 0.398834757 | 2.377225396  |
| Rattus_norvegici | 125  | 12   | 30   | 41    | 922   | 476   | 1.839589  | 0.172807  | 0.440991  | 0.47211   | 14.029676 | 7.151598  | 0.261595967 | 3.071105817  |
| Rattus_norvegici | 103  | 193  | 110  | 86    | 31    | 13    | 1.196893  | 2.191119  | 1.283651  | 0.788358  | 0.36791   | 0.151014  | 0.111389599 | -1.864158157 |
| Rattus_norvegici | 68   | 42   | 91   | 83    | 34    | 76    | 0.619629  | 0.36932   | 0.824649  | 0.594797  | 0.310441  | 0.70058   | 0.935727005 | -0.224525054 |
| Rattus_norvegici | 569  | 329  | 886  | 289   | 16    | 24    | 2.88037   | 1.867866  | 4.138292  | 1.351065  | 0.066776  | 0.103995  | 0.019248982 | -2.751736329 |
| Rattus_norvegici | 198  | 73   | 575  | 148   | 286   | 127   | 2.190466  | 0.786085  | 6.370426  | 1.300802  | 3.243461  | 1.428879  | 0.795372719 | -0.711287436 |
| Rattus_norvegici | 123  | 8    | 254  | 103   | 126   | 58    | 0.879539  | 0.053923  | 1.822655  | 0.585207  | 0.920337  | 0.418628  | 0.849762121 | -0.573603574 |
| Rattus_norvegici | 623  | 638  | 1549 | 955   | 821   | 1862  | 28.083037 | 27.107148 | 37.054757 | 34.923654 | 38.257925 | 47.400369 | 0.912976521 | 0.255205098  |
| Rattus_norvegici | 167  | 98   | 80   | 58    | 167   | 314   | 2.07467   | 1.186124  | 0.996923  | 0.571667  | 2.122611  | 3.976686  | 0.821185059 | 0.583260238  |
| Rattus_norvegici | 1472 | 1209 | 1803 | 1678  | 943   | 909   | 11.520596 | 9.227633  | 14.099281 | 10.407907 | 7.549481  | 7.211474  | 0.481513254 | -0.518773435 |
| Rattus_norvegici | 737  | 814  | 606  | 1153  | 404   | 428   | 4.455505  | 5.085923  | 3.664732  | 5.264218  | 2.478051  | 2.669286  | 0.83860722  | -0.320526285 |
| Rattus_norvegici | 125  | 93   | 141  | 88    | 10    | 23    | 2.057631  | 1.486867  | 2.416941  | 1.130531  | 0.154121  | 0.354131  | 0.1256628   | -1.826181699 |
| Rattus_norvegici | 110  | 100  | 144  | 85    | 101   | 61    | 0.486075  | 0.43027   | 0.639284  | 0.298371  | 0.454899  | 0.274496  | 0.700255474 | -0.649754713 |
| Rattus_norvegici | 8863 | 8822 | 6626 | 14538 | 21640 | 17531 | 22.207361 | 21.566349 | 16.589544 | 28.880295 | 55.467556 | 44.558922 | 0.036469233 | 1.040681381  |
| Rattus_norvegici | 102  | 89   | 121  | 118   | 100   | 138   | 1.407065  | 1.25138   | 1.646322  | 1.265849  | 1.358099  | 1.916891  | 0.988681736 | 0.060772821  |
| Rattus_norvegici | 79   | 142  | 111  | 127   | 144   | 149   | 0.502202  | 0.994546  | 0.920074  | 0.844754  | 1.193158  | 1.263332  | 0.938956869 | 0.226089544  |
| Rattus_norvegici | 123  | 190  | 128  | 94    | 88    | 102   | 0.533923  | 1.020842  | 0.497677  | 0.290093  | 0.348476  | 0.401287  | 0.628603964 | -0.755899196 |
| Rattus_norvegici | 96   | 22   | 52   | 65    | 32    | 31    | 1.361208  | 0.282559  | 0.567401  | 0.548364  | 0.351474  | 0.451788  | 0.755841192 | -0.595475267 |
| Rattus_norvegici | 213  | 153  | 164  | 0     | 202   | 56    | 3.151808  | 1.921142  | 2.694437  | 0         | 3.098048  | 0.935209  | 0.376880673 | -1.059570579 |
| Rattus_norvegici | 631  | 374  | 285  | 542   | 153   | 232   | 5.669857  | 3.251013  | 2.611985  | 3.845273  | 1.440578  | 2.200034  | 0.631536834 | -0.680954185 |
| Rattus_norvegici | 738  | 474  | 604  | 587   | 490   | 510   | 3.78532   | 2.371688  | 3.073673  | 2.361668  | 2.560435  | 2.621789  | 0.802930371 | -0.333895516 |
| Rattus_norvegici | 1    | 61   | 2    | 98    | 72    | 44    | 0.001025  | 0.500874  | 0.012557  | 0.601614  | 0.628666  | 0.370588  | 0.206189578 | 1.608711394  |
| Rattus_norvegici | 29   | 54   | 37   | 62    | 53    | 30    | 0.398307  | 0.523684  | 0.367881  | 0.480454  | 0.588647  | 0.323847  | 0.959056065 | 0.125080632  |
| Rattus_norvegici | 416  | 530  | 63   | 331   | 871   | 88    | 1.220656  | 2.295023  | 0.304465  | 1.135769  | 2.658585  | 0.261813  | 0.958955057 | 0.274036811  |
| Rattus_norvegici | 105  | 71   | 133  | 93    | 111   | 78    | 1.432451  | 0.926294  | 1.838759  | 1.0151    | 1.651251  | 1.148692  | 0.909851877 | -0.261068564 |
| Rattus_norvegici | 80   | 48   | 55   | 33    | 54    | 61    | 0.667066  | 0.387913  | 0.461521  | 0.213419  | 0.458344  | 0.518541  | 0.808925499 | -0.400580049 |
| Rattus_norvegici | 171  | 173  | 188  | 70    | 204   | 114   | 0.988386  | 0.976529  | 1.15632   | 0.318577  | 1.206116  | 0.664775  | 0.735614426 | -0.532780698 |
| Rattus_norvegici | 176  | 111  | 172  | 129   | 308   | 166   | 1.987979  | 1.224106  | 1.942681  | 1.14877   | 3.55975   | 1.897818  | 0.912203632 | 0.302926799  |
| Rattus_norvegici | 5427 | 6585 | 2192 | 6513  | 1086  | 1467  | 14.201889 | 18.227009 | 5.306585  | 15.250962 | 2.978798  | 3.984758  | 0.612608591 | -0.887515152 |
| Rattus_norvegici | 34   | 50   | 47   | 74    | 75    | 83    | 0.665495  | 0.958929  | 0.924181  | 1.167522  | 1.500802  | 1.554288  | 0.652488772 | 0.703849705  |
| Rattus_norvegici | 48   | 62   | 87   | 279   | 113   | 236   | 1.267113  | 1.626513  | 2.314289  | 5.933975  | 3.087823  | 6.441928  | 0.20169272  | 1.506368341  |
| Rattus_norvegici | 413  | 729  | 774  | 160   | 205   | 244   | 1.294368  | 2.080053  | 1.96603   | 0.450491  | 0.662329  | 0.899593  | 0.020685043 | -1.758893244 |
| Rattus_norvegici | 68   | 3    | 65   | 50    | 57    | 117   | 0.81849   | 0.011107  | 0.360275  | 0.221959  | 0.390331  | 0.88125   | 0.775215778 | 0.60965882   |
| Rattus_norvegici | 63   | 111  | 83   | 87    | 56    | 37    | 1.955802  | 2.53331   | 1.833535  | 1.539546  | 1.363654  | 1.177764  | 0.688759028 | -0.680940954 |
| Rattus_norvegici | 129  | 12   | 140  | 108   | 6     | 91    | 1.136363  | 0.096121  | 1.23615   | 0.755082  | 0.054306  | 0.814719  | 0.820965787 | -0.661074296 |

|                  |       |       |       |       |       |       |            |            |            |           |            |            |             |              |
|------------------|-------|-------|-------|-------|-------|-------|------------|------------|------------|-----------|------------|------------|-------------|--------------|
| Rattus_norvegici | 293   | 285   | 504   | 202   | 117   | 87    | 1.946609   | 1.864547   | 3.343083   | 1.067579  | 0.905378   | 0.830504   | 0.129617301 | -1.595901838 |
| Rattus_norvegici | 2025  | 2932  | 1070  | 2918  | 492   | 253   | 8.344647   | 12.354625  | 3.359219   | 7.971575  | 1.736495   | 0.831821   | 0.618224789 | -0.98278181  |
| Rattus_norvegici | 6340  | 6138  | 5933  | 11179 | 8776  | 9327  | 156.215271 | 147.547089 | 146.054565 | 218.36731 | 221.196518 | 233.125259 | 0.306758654 | 0.529005758  |
| Rattus_norvegici | 81    | 111   | 81    | 98    | 151   | 94    | 0.410301   | 0.552318   | 0.411204   | 0.396463  | 0.791221   | 0.48368    | 0.942920943 | 0.223883258  |
| Rattus_norvegici | 3102  | 3002  | 2635  | 4000  | 2896  | 3151  | 16.807831  | 16.352874  | 14.675643  | 17.669159 | 16.51873   | 17.723602  | 0.958108188 | 0.056543723  |
| Rattus_norvegici | 543   | 452   | 2     | 243   | 310   | 180   | 3.727754   | 2.359065   | 0.00171    | 1.380704  | 3.616952   | 1.583167   | 0.814859692 | -0.553232143 |
| Rattus_norvegici | 496   | 560   | 454   | 1229  | 715   | 735   | 1.121645   | 1.235607   | 1.025835   | 2.203471  | 1.654312   | 1.68585    | 0.429572745 | 0.664721759  |
| Rattus_norvegici | 389   | 468   | 304   | 249   | 180   | 265   | 4.232444   | 5.592339   | 3.294179   | 2.540177  | 2.301538   | 3.366324   | 0.45891617  | -0.873039781 |
| Rattus_norvegici | 175   | 207   | 117   | 171   | 165   | 74    | 0.69174    | 0.799152   | 0.463444   | 0.536513  | 0.667522   | 0.296747   | 0.834060455 | -0.42639779  |
| Rattus_norvegici | 231   | 25    | 119   | 133   | 348   | 381   | 4.211871   | 0.482047   | 1.935262   | 1.775227  | 6.450729   | 7.406704   | 0.466724604 | 1.119879405  |
| Rattus_norvegici | 142   | 112   | 149   | 133   | 31    | 373   | 0.548015   | 0.424413   | 0.576238   | 0.407099  | 0.121378   | 1.467809   | 0.936864761 | 0.30339372   |
| Rattus_norvegici | 55    | 83    | 68    | 55    | 71    | 73    | 0.320424   | 0.47677    | 0.397205   | 0.255545  | 0.422441   | 0.43394    | 0.94111291  | -0.155813442 |
| Rattus_norvegici | 182   | 269   | 252   | 234   | 135   | 244   | 1.974004   | 3.030673   | 3.607555   | 2.863046  | 1.735175   | 3.565364   | 0.867371366 | -0.339496526 |
| Rattus_norvegici | 62    | 198   | 0     | 35    | 111   | 64    | 0.677394   | 2.137903   | 0          | 0.306207  | 1.25373    | 0.947948   | 0.912099774 | -0.356797866 |
| Rattus_norvegici | 423   | 457   | 59    | 76    | 26    | 42    | 1.639826   | 1.570902   | 0.127346   | 0.198493  | 0.424895   | 0.263675   | 0.085960941 | -2.880235589 |
| Rattus_norvegici | 222   | 336   | 327   | 227   | 126   | 150   | 0.823401   | 1.213305   | 1.209242   | 0.665738  | 0.474676   | 0.562171   | 0.458762062 | -0.977335603 |
| Rattus_norvegici | 56    | 48    | 17    | 84    | 78    | 80    | 0.270137   | 0.224606   | 0.07844    | 0.321739  | 0.385493   | 0.394457   | 0.536284215 | 0.87755227   |
| Rattus_norvegici | 92    | 95    | 75    | 163   | 53    | 78    | 0.754953   | 0.761048   | 0.617721   | 1.068847  | 0.445808   | 0.650777   | 0.996345844 | -0.027532722 |
| Rattus_norvegici | 177   | 255   | 257   | 144   | 108   | 119   | 3.547591   | 4.897251   | 5.284848   | 2.67393   | 3.200986   | 2.296323   | 0.440764115 | -1.035784771 |
| Rattus_norvegici | 333   | 363   | 285   | 186   | 156   | 130   | 0.706935   | 0.750918   | 0.603741   | 0.311486  | 0.337092   | 0.278418   | 0.297158642 | -1.196607977 |
| Rattus_norvegici | 154   | 132   | 149   | 63    | 45    | 63    | 0.708567   | 0.593602   | 0.685731   | 0.227097  | 0.210496   | 0.290557   | 0.220737373 | -1.486059432 |
| Rattus_norvegici | 14    | 48    | 95    | 58    | 23    | 11    | 0.204051   | 0.72578    | 1.577364   | 0.807665  | 0.405885   | 0.140036   | 0.69002123  | -0.997133974 |
| Rattus_norvegici | 474   | 157   | 700   | 267   | 100   | 226   | 2.94043    | 0.956249   | 4.407921   | 1.301014  | 0.621082   | 1.437045   | 0.35006886  | -1.343683253 |
| Rattus_norvegici | 49    | 90    | 386   | 9     | 16    | 5     | 0.690507   | 0.737881   | 3.520514   | 0.059165  | 0.128203   | 0.034671   | 0.200947654 | -4.256399807 |
| Rattus_norvegici | 66    | 62    | 126   | 90    | 78    | 49    | 0.63985    | 0.600343   | 1.28558    | 0.683213  | 0.842001   | 0.45679    | 0.863329695 | -0.383570322 |
| Rattus_norvegici | 362   | 279   | 725   | 64    | 82    | 85    | 4.055443   | 3.045933   | 8.308432   | 0.557211  | 1.129078   | 0.958726   | 0.016291682 | -2.682425241 |
| Rattus_norvegici | 49    | 82    | 57    | 38    | 57    | 45    | 0.586241   | 0.961951   | 0.684671   | 0.360138  | 0.700428   | 0.550006   | 0.728959721 | -0.526626209 |
| Rattus_norvegici | 82    | 129   | 49    | 177   | 256   | 272   | 0.279342   | 0.643883   | 0.166252   | 0.562396  | 1.222958   | 2.155501   | 0.295335459 | 1.347746904  |
| Rattus_norvegici | 67    | 69    | 64    | 64    | 56    | 34    | 0.675116   | 0.681265   | 0.64292    | 0.513442  | 0.572661   | 0.346075   | 0.766306862 | -0.525386013 |
| Rattus_norvegici | 105   | 80    | 83    | 203   | 28    | 46    | 1.116964   | 0.802117   | 0.892561   | 1.696501  | 0.296248   | 0.474131   | 0.973880861 | -0.20718662  |
| Rattus_norvegici | 45    | 43    | 84    | 53    | 19    | 62    | 0.429851   | 0.398413   | 0.803017   | 0.400476  | 0.183266   | 0.599104   | 0.766858349 | -0.516297694 |
| Rattus_norvegici | 79    | 80    | 254   | 104   | 102   | 21    | 0.779214   | 0.769549   | 2.511977   | 0.816728  | 1.026159   | 0.203891   | 0.617546456 | -1.035394448 |
| Rattus_norvegici | 20    | 0     | 112   | 173   | 1     | 85    | 0.618467   | 0          | 2.726743   | 3.926468  | 0.006355   | 1.487741   | 0.827184818 | 0.710694236  |
| Rattus_norvegici | 434   | 476   | 143   | 1473  | 643   | 425   | 14.948958  | 15.915657  | 4.874507   | 40.17184  | 22.678496  | 14.723903  | 0.321723334 | 1.078547093  |
| Rattus_norvegici | 113   | 149   | 77    | 119   | 68    | 10    | 1.046504   | 1.24773    | 0.576216   | 1.012695  | 0.815315   | 0.077344   | 0.528720627 | -0.983365405 |
| Rattus_norvegici | 62    | 132   | 101   | 289   | 89    | 198   | 0.533958   | 1.116009   | 0.875536   | 1.990183  | 0.788903   | 1.74365    | 0.595875867 | 0.788334697  |
| Rattus_norvegici | 64    | 4     | 71    | 49    | 1     | 55    | 1.03116    | 0.054996   | 1.137167   | 0.621298  | 0.013181   | 0.901194   | 0.856378267 | -0.593839809 |
| Rattus_norvegici | 115   | 48    | 181   | 28    | 5     | 15    | 0.734039   | 0.298756   | 1.152449   | 0.141606  | 0.026358   | 0.091483   | 0.026867948 | -3.060268168 |
| Rattus_norvegici | 64    | 55    | 173   | 34    | 18    | 38    | 0.414069   | 0.348377   | 1.128511   | 0.175444  | 0.114508   | 0.246418   | 0.250653624 | -1.852199432 |
| Rattus_norvegici | 193   | 135   | 123   | 665   | 192   | 261   | 0.989469   | 0.671048   | 0.629077   | 2.701288  | 1.005803   | 1.354403   | 0.311946378 | 1.101438644  |
| Rattus_norvegici | 927   | 1731  | 1126  | 1442  | 979   | 1225  | 3.422195   | 6.345711   | 4.530397   | 4.317218  | 4.420656   | 4.817606   | 0.853934648 | -0.194024826 |
| Rattus_norvegici | 1983  | 2289  | 2199  | 3765  | 3716  | 4797  | 30.715742  | 33.160859  | 36.364362  | 43.250376 | 53.853198  | 77.676502  | 0.0698208   | 0.805929725  |
| Rattus_norvegici | 154   | 182   | 119   | 250   | 237   | 292   | 0.71322    | 0.825358   | 0.552672   | 0.918094  | 1.124162   | 1.373616   | 0.690258246 | 0.657279278  |
| Rattus_norvegici | 47    | 12    | 27    | 86    | 176   | 91    | 0.788348   | 0.184554   | 0.461256   | 1.161179  | 3.081944   | 1.569261   | 0.079803865 | 1.935909207  |
| Rattus_norvegici | 25865 | 36499 | 23588 | 23826 | 15924 | 10733 | 89.316148  | 121.882391 | 81.215161  | 64.542592 | 56.315882  | 37.617798  | 0.099035754 | -0.930263521 |
| Rattus_norvegici | 76    | 49    | 88    | 120   | 42    | 64    | 1.667379   | 1.043179   | 1.928012   | 2.104834  | 0.935479   | 1.430479   | 0.986392652 | -0.108959811 |
| Rattus_norvegici | 38076 | 54005 | 32734 | 26516 | 15580 | 12474 | 64.441987  | 89.076372  | 55.346156  | 35.570222 | 27.638192  | 21.406804  | 0.011117384 | -1.360554893 |
| Rattus_norvegici | 4828  | 7269  | 4324  | 4096  | 2901  | 1882  | 62.633844  | 92.857884  | 56.413696  | 42.618855 | 39.170288  | 24.799504  | 0.023506249 | -1.045168391 |
| Rattus_norvegici | 11273 | 14855 | 10411 | 11272 | 8137  | 4745  | 109.094894 | 140.268616 | 100.675072 | 86.482002 | 80.549522  | 46.578075  | 0.117000781 | -0.758439056 |
| Rattus_norvegici | 58    | 46    | 95    | 19    | 10    | 81    | 0.85467    | 0.655672   | 1.644129   | 0.214595  | 0.149155   | 1.196593   | 0.536433534 | -0.948177528 |
| Rattus_norvegici | 56    | 100   | 0     | 127   | 191   | 108   | 0.178837   | 0.313157   | 0          | 0.325306  | 0.631374   | 0.351885   | 0.299742012 | 1.356771065  |

|                  |      |      |      |      |      |      |           |           |           |           |           |           |             |              |
|------------------|------|------|------|------|------|------|-----------|-----------|-----------|-----------|-----------|-----------|-------------|--------------|
| Rattus_norvegici | 94   | 84   | 133  | 114  | 74   | 65   | 1.107715  | 1.026356  | 1.572791  | 1.167966  | 0.944476  | 0.818439  | 0.829849359 | -0.463974814 |
| Rattus_norvegici | 0    | 54   | 0    | 117  | 49   | 4    | 0         | 1.235543  | 0         | 2.191613  | 1.180642  | 0.085105  | 0.638994536 | 1.451973056  |
| Rattus_norvegici | 110  | 155  | 94   | 248  | 164  | 219  | 3.291577  | 4.364718  | 2.665272  | 5.418499  | 5.928644  | 6.286918  | 0.682122199 | 0.673841094  |
| Rattus_norvegici | 49   | 34   | 33   | 65   | 20   | 47   | 1.10407   | 0.734523  | 0.730695  | 1.164112  | 0.452276  | 1.06696   | 0.990515994 | 0.008470233  |
| Rattus_norvegici | 46   | 32   | 19   | 67   | 39   | 49   | 1.107247  | 0.751953  | 0.460991  | 1.290141  | 0.969442  | 1.203633  | 0.720393024 | 0.522815399  |
| Rattus_norvegici | 40   | 56   | 14   | 50   | 82   | 52   | 0.557731  | 0.795135  | 0.177161  | 0.542634  | 1.18184   | 0.757321  | 0.69002123  | 0.649151445  |
| Rattus_norvegici | 128  | 128  | 183  | 162  | 104  | 48   | 0.806677  | 0.792333  | 1.155692  | 0.810828  | 0.670153  | 0.307318  | 0.722445727 | -0.667322855 |
| Rattus_norvegici | 103  | 141  | 157  | 171  | 38   | 36   | 0.58496   | 0.780437  | 0.894534  | 0.769547  | 0.219353  | 0.202742  | 0.579554207 | -0.95342694  |
| Rattus_norvegici | 874  | 812  | 1032 | 906  | 507  | 515  | 2.349508  | 2.13029   | 2.764615  | 1.958581  | 1.36884   | 1.21259   | 0.438426828 | -0.665963246 |
| Rattus_norvegici | 68   | 162  | 107  | 67   | 96   | 45   | 0.579708  | 1.425084  | 0.952387  | 0.447717  | 0.845185  | 0.377942  | 0.586552928 | -0.809650315 |
| Rattus_norvegici | 66   | 62   | 70   | 108  | 64   | 53   | 4.033729  | 3.68535   | 4.235893  | 5.245178  | 3.980432  | 3.246614  | 0.991136006 | 0.012647159  |
| Rattus_norvegici | 117  | 118  | 117  | 179  | 63   | 80   | 0.778584  | 0.63408   | 0.76104   | 0.639219  | 0.290817  | 0.742073  | 0.909851877 | -0.324528981 |
| Rattus_norvegici | 606  | 739  | 670  | 339  | 290  | 375  | 2.224728  | 3.302505  | 4.282211  | 1.28403   | 1.555217  | 2.91817   | 0.16704306  | -1.13189043  |
| Rattus_norvegici | 921  | 1154 | 1023 | 1322 | 917  | 894  | 4.816687  | 6.307077  | 5.514511  | 6.5194    | 6.065517  | 5.036156  | 0.924042888 | -0.135251849 |
| Rattus_norvegici | 222  | 82   | 157  | 54   | 24   | 43   | 1.261707  | 0.452497  | 1.084358  | 0.432095  | 0.137921  | 0.242646  | 0.055641728 | -2.097947787 |
| Rattus_norvegici | 277  | 125  | 162  | 169  | 28   | 63   | 2.497141  | 1.099984  | 1.457274  | 1.202425  | 0.250888  | 0.576044  | 0.327003843 | -1.347544347 |
| Rattus_norvegici | 200  | 308  | 84   | 270  | 233  | 105  | 0.811187  | 1.330794  | 0.337997  | 0.870215  | 1.27295   | 0.432392  | 0.970555041 | -0.106909732 |
| Rattus_norvegici | 51   | 55   | 21   | 45   | 47   | 33   | 1.215467  | 1.293664  | 0.504844  | 0.84298   | 1.141852  | 0.795575  | 0.944864629 | -0.147162185 |
| Rattus_norvegici | 1176 | 1116 | 1146 | 1417 | 1423 | 1660 | 7.248869  | 6.41813   | 6.767193  | 6.568974  | 8.480505  | 9.832869  | 0.789893601 | 0.267407071  |
| Rattus_norvegici | 38   | 37   | 42   | 58   | 74   | 60   | 1.869113  | 1.780169  | 2.050596  | 2.275332  | 3.73446   | 3.070643  | 0.715204156 | 0.598201368  |
| Rattus_norvegici | 620  | 625  | 393  | 1133 | 1008 | 934  | 3.485962  | 3.428216  | 2.204857  | 5.051757  | 5.801777  | 5.330032  | 0.308987934 | 0.776801682  |
| Rattus_norvegici | 653  | 464  | 845  | 539  | 268  | 195  | 4.864523  | 3.986729  | 10.066375 | 6.033626  | 4.542703  | 1.466408  | 0.193021127 | -1.164016917 |
| Rattus_norvegici | 69   | 141  | 64   | 779  | 93   | 59   | 0.907194  | 0.98671   | 0.546021  | 6.26709   | 0.718109  | 0.444832  | 0.659219908 | 1.485555873  |
| Rattus_norvegici | 251  | 187  | 311  | 969  | 406  | 475  | 0.695676  | 0.456246  | 1.079754  | 2.023524  | 1.175573  | 1.422227  | 0.208992479 | 1.113788317  |
| Rattus_norvegici | 689  | 906  | 550  | 758  | 1537 | 1042 | 2.829711  | 3.628689  | 2.249022  | 2.462288  | 6.420369  | 4.346567  | 0.617745347 | 0.551181352  |
| Rattus_norvegici | 85   | 70   | 55   | 36   | 8    | 8    | 0.583104  | 0.428341  | 0.376941  | 0.190434  | 0.054083  | 0.045288  | 0.014457271 | -2.251714718 |
| Rattus_norvegici | 210  | 39   | 1803 | 77   | 2    | 36   | 3.004787  | 0.532808  | 25.833109 | 0.86704   | 0.028758  | 0.511651  | 0.43483249  | -4.419348778 |
| Rattus_norvegici | 119  | 81   | 129  | 44   | 28   | 23   | 1.208624  | 0.801154  | 1.305525  | 0.347629  | 0.287278  | 0.231813  | 0.066845958 | -1.961840572 |
| Rattus_norvegici | 1008 | 1039 | 1090 | 1366 | 954  | 822  | 47.713313 | 47.923007 | 51.536445 | 51.256551 | 46.150126 | 39.462139 | 0.912527355 | -0.154574069 |
| Rattus_norvegici | 83   | 119  | 114  | 9    | 0    | 176  | 0.43901   | 0.617936  | 0.6041    | 0.035057  | 0         | 0.950669  | 0.707656587 | -0.824520371 |
| Rattus_norvegici | 0    | 784  | 612  | 909  | 722  | 0    | 0         | 4.268249  | 3.440458  | 3.020855  | 3.297738  | 0         | 0.984602116 | 0.039622048  |
| Rattus_norvegici | 103  | 6    | 1    | 368  | 0    | 102  | 0.780051  | 0.04164   | 0.006761  | 2.224025  | 0         | 0.785484  | 0.599516025 | 1.821181733  |
| Rattus_norvegici | 194  | 15   | 147  | 594  | 41   | 121  | 1.499931  | 0.107752  | 1.140134  | 3.643265  | 0.319728  | 0.93387   | 0.781253136 | 0.801754393  |
| Rattus_norvegici | 143  | 138  | 159  | 143  | 81   | 49   | 1.143267  | 1.159533  | 1.400074  | 0.974175  | 0.732152  | 0.372842  | 0.594872346 | -0.873541541 |
| Rattus_norvegici | 119  | 230  | 184  | 287  | 171  | 181  | 0.731902  | 1.387982  | 1.135242  | 1.405854  | 1.078197  | 1.131803  | 0.96539562  | 0.103009569  |
| Rattus_norvegici | 58   | 75   | 172  | 135  | 51   | 85   | 1.509351  | 1.927293  | 4.476751  | 2.685057  | 1.27774   | 2.150024  | 0.89124181  | -0.358458729 |
| Rattus_norvegici | 67   | 47   | 142  | 84   | 0    | 42   | 0.724816  | 0.702896  | 0.705913  | 0.438751  | 0         | 0.252269  | 0.497932903 | -1.269991913 |
| Rattus_norvegici | 134  | 178  | 146  | 47   | 32   | 49   | 4.722599  | 6.159945  | 5.207821  | 1.307287  | 1.113782  | 1.71353   | 0.071124625 | -1.974671769 |
| Rattus_norvegici | 72   | 44   | 61   | 1181 | 41   | 93   | 0.268457  | 0.159558  | 0.225289  | 5.566212  | 0.287218  | 0.350758  | 0.582170782 | 2.579741401  |
| Rattus_norvegici | 379  | 397  | 396  | 172  | 122  | 131  | 4.605887  | 4.624153  | 5.007633  | 1.964159  | 1.372978  | 1.508386  | 0.105618003 | -1.611268417 |
| Rattus_norvegici | 68   | 69   | 104  | 74   | 51   | 47   | 0.494353  | 0.491428  | 0.763315  | 0.42797   | 0.379396  | 0.349421  | 0.703341159 | -0.646168983 |
| Rattus_norvegici | 34   | 52   | 124  | 39   | 201  | 42   | 0.562579  | 0.8154    | 1.998171  | 0.472991  | 3.876072  | 0.832389  | 0.94404387  | 0.355351978  |
| Rattus_norvegici | 118  | 74   | 242  | 58   | 58   | 55   | 1.579833  | 0.560307  | 2.545069  | 0.62683   | 0.454854  | 0.724143  | 0.260284289 | -1.482518576 |
| Rattus_norvegici | 79   | 91   | 37   | 90   | 29   | 61   | 1.364241  | 1.682335  | 0.682474  | 1.335149  | 0.585571  | 1.212798  | 0.868219444 | -0.373697616 |
| Rattus_norvegici | 195  | 110  | 156  | 194  | 83   | 180  | 1.099364  | 0.606927  | 0.87909   | 0.870435  | 0.477391  | 1.030653  | 0.956802198 | -0.17255849  |
| Rattus_norvegici | 1332 | 1513 | 1664 | 1364 | 855  | 1158 | 41.463127 | 45.977348 | 51.766026 | 33.684814 | 27.225971 | 36.565018 | 0.389301694 | -0.566528494 |
| Rattus_norvegici | 6    | 22   | 56   | 99   | 3    | 48   | 0.119505  | 0.5279    | 0.403104  | 0.456391  | 0.011064  | 0.251216  | 0.825868344 | 0.591496964  |
| Rattus_norvegici | 390  | 473  | 722  | 164  | 213  | 115  | 8.705711  | 10.315825 | 16.125107 | 2.899024  | 4.857575  | 2.602493  | 0.030355944 | -1.815271065 |
| Rattus_norvegici | 32   | 50   | 17   | 110  | 55   | 114  | 0.341533  | 0.631123  | 0.177569  | 0.934686  | 0.598046  | 1.354138  | 0.238316317 | 1.357908277  |
| Rattus_norvegici | 69   | 46   | 33   | 92   | 67   | 90   | 0.860083  | 0.558191  | 0.399818  | 0.907277  | 0.854066  | 1.137257  | 0.710737552 | 0.614891061  |
| Rattus_norvegici | 55   | 65   | 34   | 113  | 46   | 63   | 0.970218  | 1.114277  | 0.592256  | 1.586376  | 0.821162  | 1.115642  | 0.844151442 | 0.352322339  |

|                  |       |       |       |       |       |       |            |            |            |            |            |           |             |              |
|------------------|-------|-------|-------|-------|-------|-------|------------|------------|------------|------------|------------|-----------|-------------|--------------|
| Rattus_norvegici | 141   | 102   | 83    | 224   | 110   | 222   | 2.744492   | 1.938559   | 1.607057   | 3.448282   | 2.189183   | 4.37843   | 0.716389509 | 0.621950498  |
| Rattus_norvegici | 318   | 265   | 175   | 515   | 273   | 382   | 4.751408   | 3.914814   | 2.568758   | 6.035876   | 3.944501   | 5.601194  | 0.754770199 | 0.469688421  |
| Rattus_norvegici | 95    | 102   | 39    | 156   | 71    | 57    | 1.922439   | 1.816469   | 0.713596   | 2.273923   | 1.327319   | 1.055758  | 0.966447498 | 0.082538312  |
| Rattus_norvegici | 291   | 253   | 358   | 231   | 100   | 166   | 8.239591   | 6.977759   | 10.282865  | 4.235887   | 2.253565   | 4.355862  | 0.427129542 | -1.031623298 |
| Rattus_norvegici | 225   | 116   | 242   | 191   | 142   | 112   | 3.027749   | 1.520098   | 3.254638   | 2.042707   | 1.974041   | 1.52935   | 0.771495842 | -0.550838261 |
| Rattus_norvegici | 96    | 60    | 62    | 218   | 127   | 113   | 1.636677   | 0.89572    | 1.172466   | 2.500208   | 2.261441   | 1.83605   | 0.533082571 | 0.900869846  |
| Rattus_norvegici | 190   | 30    | 278   | 207   | 96    | 93    | 2.583296   | 0.396934   | 3.776066   | 2.231307   | 1.327003   | 1.275378  | 0.83363474  | -0.530704101 |
| Rattus_norvegici | 836   | 489   | 361   | 650   | 473   | 400   | 6.862104   | 3.202621   | 3.169465   | 4.54027    | 4.075186   | 2.973008  | 0.842520348 | -0.298729149 |
| Rattus_norvegici | 96    | 91    | 61    | 174   | 82    | 108   | 1.44299    | 1.463472   | 0.903259   | 2.331687   | 1.175891   | 2.034426  | 0.842520348 | 0.385606222  |
| Rattus_norvegici | 218   | 58    | 94    | 261   | 93    | 69    | 0.995259   | 0.255113   | 0.425679   | 0.942492   | 0.431695   | 0.319277  | 0.988681736 | -0.025050907 |
| Rattus_norvegici | 144   | 106   | 100   | 91    | 63    | 111   | 0.744266   | 0.535446   | 0.518471   | 0.37225    | 0.332279   | 0.58462   | 0.774592935 | -0.532159815 |
| Rattus_norvegici | 843   | 478   | 552   | 1369  | 546   | 660   | 4.544242   | 2.313615   | 2.990528   | 6.038691   | 3.222523   | 4.028659  | 0.788549316 | 0.269406948  |
| Rattus_norvegici | 127   | 69    | 160   | 67    | 40    | 36    | 1.794702   | 0.958015   | 2.262445   | 0.749901   | 0.573836   | 0.507868  | 0.224931768 | -1.490985921 |
| Rattus_norvegici | 13532 | 15121 | 15806 | 21903 | 18346 | 22611 | 316.439774 | 265.223358 | 347.529664 | 312.168091 | 337.374115 | 412.3125  | 0.636462256 | 0.368166028  |
| Rattus_norvegici | 57    | 31    | 92    | 7     | 132   | 827   | 1.411804   | 0.735839   | 2.293059   | 0.132746   | 3.382      | 21.047321 | 0.633392173 | 2.375718073  |
| Rattus_norvegici | 113   | 63    | 250   | 75    | 33    | 79    | 0.447285   | 0.242627   | 0.989152   | 0.235693   | 0.131703   | 0.31662   | 0.419002545 | -1.350804445 |
| Rattus_norvegici | 183   | 145   | 266   | 195   | 105   | 237   | 1.47582    | 1.14528    | 2.150954   | 1.252293   | 0.869704   | 1.941393  | 0.897004342 | -0.289714701 |
| Rattus_norvegici | 49    | 41    | 64    | 43    | 32    | 46    | 1.064331   | 0.863745   | 1.392205   | 0.733323   | 0.714722   | 1.006626  | 0.766858349 | -0.486348972 |
| Rattus_norvegici | 160   | 108   | 268   | 267   | 117   | 271   | 1.071215   | 0.720175   | 1.684755   | 1.394577   | 0.815509   | 1.589479  | 0.955691711 | 0.128555128  |
| Rattus_norvegici | 351   | 158   | 345   | 468   | 72    | 280   | 1.498816   | 0.654754   | 1.470226   | 1.58262    | 0.312645   | 1.210821  | 0.927603995 | -0.269256102 |
| Rattus_norvegici | 385   | 185   | 243   | 428   | 240   | 289   | 2.442147   | 1.104459   | 1.484117   | 2.130949   | 1.630432   | 1.94398   | 0.970555041 | 0.071034801  |
| Rattus_norvegici | 1922  | 1223  | 3827  | 1716  | 1351  | 1106  | 5.927794   | 2.849374   | 10.817265  | 3.743722   | 4.447971   | 3.589775  | 0.497599201 | -0.900595564 |
| Rattus_norvegici | 152   | 130   | 121   | 201   | 68    | 67    | 1.271547   | 1.215465   | 1.043349   | 1.245986   | 0.497045   | 0.564559  | 0.846900877 | -0.470766876 |
| Rattus_norvegici | 208   | 198   | 172   | 186   | 131   | 135   | 2.615517   | 2.42739    | 2.159662   | 1.847007   | 1.675294   | 1.720575  | 0.792669524 | -0.50328852  |
| Rattus_norvegici | 144   | 177   | 141   | 188   | 16    | 122   | 0.691823   | 0.829016   | 0.67702    | 0.718706   | 0.074482   | 0.597113  | 0.707656587 | -0.707134039 |
| Rattus_norvegici | 2801  | 1580  | 1387  | 75    | 2940  | 4     | 6.761404   | 3.721076   | 3.343409   | 0.141881   | 7.258223   | 0.007395  | 0.656236799 | -0.955655048 |
| Rattus_norvegici | 160   | 180   | 220   | 156   | 40    | 70    | 1.980942   | 2.16733    | 2.716969   | 1.528847   | 0.504518   | 0.86885   | 0.350841943 | -1.282837171 |
| Rattus_norvegici | 75    | 113   | 104   | 117   | 111   | 40    | 1.40978    | 2.093956   | 1.963168   | 1.761101   | 2.159531   | 0.767514  | 0.912475348 | -0.276518805 |
| Rattus_norvegici | 185   | 145   | 76    | 95    | 304   | 101   | 1.729225   | 1.493811   | 0.908365   | 0.63444    | 2.458894   | 0.982048  | 0.956802198 | 0.228077651  |
| Rattus_norvegici | 589   | 2690  | 316   | 734   | 370   | 306   | 1.836561   | 7.761462   | 0.983311   | 1.582583   | 1.150975   | 0.822152  | 0.627136488 | -1.512708879 |
| Rattus_norvegici | 718   | 985   | 207   | 295   | 68    | 12    | 1.46742    | 1.974845   | 0.420058   | 0.486627   | 0.143065   | 0.023444  | 0.079803865 | -2.605465978 |
| Rattus_norvegici | 275   | 211   | 501   | 241   | 102   | 100   | 3.14536    | 2.193484   | 6.752597   | 2.744657   | 1.158853   | 1.517563  | 0.246509695 | -1.356081192 |
| Rattus_norvegici | 163   | 151   | 112   | 263   | 102   | 145   | 0.760579   | 0.70092    | 0.496852   | 0.996695   | 0.512823   | 0.731483  | 0.96798962  | 0.078632501  |
| Rattus_norvegici | 168   | 210   | 210   | 190   | 135   | 192   | 0.590294   | 0.721743   | 0.740783   | 0.531629   | 0.485359   | 0.684188  | 0.877128604 | -0.323048279 |
| Rattus_norvegici | 48    | 61    | 62    | 59    | 28    | 22    | 0.36865    | 0.45814    | 0.476987   | 0.36221    | 0.22216    | 0.172418  | 0.548693461 | -0.839605889 |
| Rattus_norvegici | 112   | 122   | 124   | 34    | 20    | 34    | 0.902468   | 1.354495   | 1.349672   | 0.213687   | 0.16263    | 0.648224  | 0.03565856  | -2.168524189 |
| Rattus_norvegici | 77    | 25    | 14    | 94    | 28    | 65    | 0.665688   | 0.210898   | 0.119925   | 0.646411   | 0.241467   | 0.570723  | 0.780063863 | 0.50966475   |
| Rattus_norvegici | 99    | 212   | 79    | 134   | 94    | 167   | 0.525539   | 1.108111   | 0.420049   | 0.570413   | 0.672383   | 1.191659  | 0.967292043 | -0.10066285  |
| Rattus_norvegici | 103   | 159   | 181   | 244   | 66    | 91    | 0.837324   | 1.103984   | 1.213899   | 1.576507   | 0.440101   | 0.717227  | 0.901057746 | -0.358136701 |
| Rattus_norvegici | 58    | 54    | 84    | 35    | 9     | 28    | 1.227539   | 1.142437   | 1.274549   | 0.412583   | 0.124518   | 0.625892  | 0.104753538 | -1.626086382 |
| Rattus_norvegici | 125   | 141   | 74    | 51    | 24    | 40    | 0.722622   | 0.876125   | 0.330088   | 0.230801   | 0.125939   | 0.245554  | 0.12476483  | -1.719517909 |
| Rattus_norvegici | 155   | 208   | 315   | 76    | 35    | 69    | 0.794919   | 1.044155   | 1.619162   | 0.308861   | 0.179847   | 0.358559  | 0.055668993 | -2.073388739 |
| Rattus_norvegici | 244   | 180   | 262   | 260   | 156   | 164   | 1.218701   | 0.980507   | 1.289318   | 0.911901   | 0.588983   | 0.782972  | 0.843934894 | -0.407300539 |
| Rattus_norvegici | 231   | 215   | 186   | 113   | 94    | 171   | 0.811098   | 0.718563   | 0.897496   | 0.286685   | 0.308951   | 0.611301  | 0.547318384 | -0.858000868 |
| Rattus_norvegici | 26    | 63    | 17    | 9     | 160   | 137   | 0.452121   | 0.621725   | 0.294914   | 0.123064   | 2.012225   | 1.690026  | 0.525652395 | 1.508656463  |
| Rattus_norvegici | 137   | 122   | 184   | 83    | 43    | 0     | 0.616109   | 0.53235    | 0.8277     | 0.296326   | 0.197421   | 0         | 0.074919766 | -2.042084018 |
| Rattus_norvegici | 826   | 507   | 2715  | 100   | 71    | 10    | 3.60378    | 2.552556   | 11.41846   | 0.202225   | 0.188046   | 0.073401  | 0.068705145 | -4.689056594 |
| Rattus_norvegici | 151   | 38    | 78    | 139   | 10    | 9     | 2.8628     | 0.621726   | 1.345393   | 2.112991   | 0.156661   | 0.144812  | 0.724811413 | -1.065534203 |
| Rattus_norvegici | 373   | 18    | 17    | 391   | 398   | 142   | 3.440017   | 0.141638   | 0.167023   | 2.714353   | 3.770354   | 1.359613  | 0.631397917 | 1.039693615  |
| Rattus_norvegici | 1207  | 821   | 1567  | 1078  | 786   | 602   | 4.214929   | 2.290877   | 4.524065   | 2.421988   | 2.260494   | 1.779606  | 0.310473706 | -0.706920046 |
| Rattus_norvegici | 444   | 410   | 354   | 514   | 478   | 435   | 11.19912   | 10.086575  | 8.918988   | 10.280762  | 12.347045  | 11.134636 | 0.96387201  | 0.108237703  |

|                  |      |      |      |      |      |      |           |           |           |           |           |           |             |              |
|------------------|------|------|------|------|------|------|-----------|-----------|-----------|-----------|-----------|-----------|-------------|--------------|
| Rattus_norvegici | 8    | 13   | 177  | 372  | 2963 | 3099 | 0.023569  | 0.036196  | 0.977389  | 1.557055  | 16.004082 | 15.714219 | 0.010428726 | 4.953916393  |
| Rattus_norvegici | 67   | 73   | 115  | 14   | 30   | 23   | 0.705487  | 0.554089  | 0.973882  | 0.081505  | 0.236475  | 0.181343  | 0.032149644 | -2.019775908 |
| Rattus_norvegici | 31   | 32   | 33   | 66   | 58   | 93   | 0.562364  | 0.556451  | 0.597522  | 0.936638  | 1.066457  | 1.700936  | 0.392187888 | 1.057502766  |
| Rattus_norvegici | 182  | 28   | 165  | 4    | 57   | 45   | 2.785548  | 0.417197  | 2.528747  | 0.036662  | 0.888678  | 0.699245  | 0.22595443  | -1.870970371 |
| Rattus_norvegici | 103  | 60   | 118  | 114  | 81   | 71   | 0.586254  | 0.329616  | 0.669409  | 0.514644  | 0.47173   | 0.409754  | 0.931198996 | -0.240129952 |
| Rattus_norvegici | 142  | 75   | 166  | 115  | 78   | 40   | 0.667376  | 0.344833  | 0.783986  | 0.428247  | 0.376072  | 0.189535  | 0.57672461  | -0.897701349 |
| Rattus_norvegici | 205  | 236  | 233  | 321  | 204  | 189  | 1.683982  | 1.893766  | 1.916651  | 2.092161  | 1.711764  | 1.575591  | 0.983258887 | -0.07792827  |
| Rattus_norvegici | 23   | 41   | 74   | 13   | 90   | 609  | 0.088946  | 0.156593  | 0.289793  | 0.040445  | 0.364258  | 2.44181   | 0.64152074  | 2.319151504  |
| Rattus_norvegici | 2728 | 2665 | 3888 | 2134 | 1534 | 1543 | 10.687674 | 9.920395  | 14.386715 | 6.636392  | 6.472602  | 6.557287  | 0.020123572 | -0.98576703  |
| Rattus_norvegici | 119  | 139  | 86   | 170  | 25   | 32   | 1.232292  | 1.367818  | 1.066577  | 1.401354  | 0.263807  | 0.33531   | 0.643373644 | -0.854197461 |
| Rattus_norvegici | 98   | 134  | 58   | 224  | 131  | 122  | 0.519411  | 0.68948   | 0.306188  | 0.939598  | 0.710209  | 0.654269  | 0.754451973 | 0.558348711  |
| Rattus_norvegici | 63   | 237  | 8    | 138  | 27   | 18   | 0.501681  | 1.859662  | 0.060436  | 0.879973  | 0.212865  | 0.14168   | 0.827740296 | -0.987368648 |
| Rattus_norvegici | 359  | 135  | 274  | 125  | 16   | 93   | 5.150379  | 1.854693  | 3.99146   | 1.399408  | 0.22582   | 1.389732  | 0.085960941 | -1.913543169 |
| Rattus_norvegici | 48   | 56   | 47   | 130  | 47   | 114  | 0.931958  | 0.702148  | 0.67529   | 1.526939  | 0.729691  | 1.544473  | 0.591421664 | 0.784523292  |
| Rattus_norvegici | 166  | 0    | 238  | 164  | 0    | 486  | 0.63917   | 0         | 0.917796  | 0.501384  | 0         | 1.904453  | 0.903689797 | 0.55710611   |
| Rattus_norvegici | 87   | 86   | 86   | 253  | 248  | 243  | 0.827405  | 0.947647  | 0.956311  | 2.146773  | 2.725735  | 2.927776  | 0.25291884  | 1.394777068  |
| Rattus_norvegici | 62   | 47   | 34   | 72   | 37   | 51   | 1.040287  | 0.651317  | 0.489466  | 0.872223  | 0.601413  | 0.895304  | 0.997665379 | 0.001594269  |
| Rattus_norvegici | 121  | 116  | 164  | 104  | 101  | 92   | 3.202641  | 2.977075  | 4.336038  | 2.178731  | 2.726036  | 2.46408   | 0.756273771 | -0.567072128 |
| Rattus_norvegici | 122  | 72   | 50   | 112  | 103  | 127  | 0.710666  | 0.409143  | 0.290167  | 0.51536   | 0.611879  | 0.748471  | 0.873269052 | 0.364614525  |
| Rattus_norvegici | 201  | 139  | 126  | 126  | 104  | 76   | 1.736256  | 1.174706  | 1.08258   | 0.858941  | 0.917286  | 0.660694  | 0.644802156 | -0.754841253 |
| Rattus_norvegici | 1855 | 1773 | 2402 | 1772 | 2202 | 1792 | 4.190289  | 3.90833   | 5.299882  | 3.03161   | 4.586238  | 3.702745  | 0.817436169 | -0.184434838 |
| Rattus_norvegici | 100  | 146  | 114  | 112  | 71   | 45   | 0.608971  | 0.88098   | 0.846201  | 0.700524  | 0.470714  | 0.403342  | 0.610956742 | -0.829239338 |
| Rattus_norvegici | 67   | 60   | 128  | 353  | 129  | 100  | 1.39525   | 1.2407    | 2.716592  | 6.142747  | 2.802104  | 2.158802  | 0.455567887 | 0.971532398  |
| Rattus_norvegici | 170  | 196  | 129  | 315  | 148  | 114  | 1.419087  | 1.591955  | 1.110591  | 2.062888  | 1.235901  | 0.945661  | 0.978876216 | 0.033917253  |
| Rattus_norvegici | 342  | 205  | 222  | 252  | 279  | 259  | 3.129605  | 2.352342  | 2.162213  | 2.575335  | 2.208608  | 2.794453  | 0.969885741 | -0.083057046 |
| Rattus_norvegici | 97   | 19   | 118  | 59   | 31   | 18   | 0.382568  | 0.070988  | 0.464673  | 0.183772  | 0.124089  | 0.071054  | 0.437984511 | -1.319342607 |
| Rattus_norvegici | 2268 | 1432 | 2072 | 1625 | 332  | 273  | 17.815807 | 8.331642  | 14.292841 | 9.224026  | 2.435916  | 1.898652  | 0.021517644 | -1.627232965 |
| Rattus_norvegici | 206  | 296  | 257  | 505  | 340  | 348  | 2.274373  | 2.074185  | 1.840893  | 3.057979  | 2.511041  | 2.534627  | 0.732148956 | 0.500721227  |
| Rattus_norvegici | 94   | 100  | 70   | 138  | 113  | 116  | 1.73222   | 1.787903  | 1.274109  | 2.00922   | 2.115734  | 2.158817  | 0.879683585 | 0.339840362  |
| Rattus_norvegici | 91   | 22   | 89   | 170  | 71   | 58   | 1.287285  | 0.54662   | 1.041849  | 1.446394  | 0.611735  | 1.531575  | 0.833837544 | 0.356387002  |
| Rattus_norvegici | 20   | 25   | 6    | 64   | 65   | 62   | 0.261439  | 0.31099   | 0.078873  | 0.669976  | 0.874608  | 0.831191  | 0.04660277  | 1.790397942  |
| Rattus_norvegici | 49   | 190  | 97   | 33   | 10   | 19   | 0.754748  | 1.734496  | 1.385012  | 0.360291  | 0.092893  | 0.12655   | 0.065132255 | -2.618750867 |
| Rattus_norvegici | 34   | 36   | 47   | 130  | 70   | 96   | 0.965837  | 1.035329  | 1.347152  | 2.999975  | 2.082745  | 2.944342  | 0.33028176  | 1.176792809  |
| Rattus_norvegici | 86   | 93   | 41   | 47   | 72   | 34   | 0.741104  | 0.785404  | 0.355091  | 0.317808  | 0.631729  | 0.298341  | 0.672085432 | -0.631239732 |
| Rattus_norvegici | 310  | 311  | 332  | 299  | 357  | 314  | 1.613128  | 1.571704  | 1.882234  | 1.328194  | 1.885503  | 1.440938  | 0.962510967 | -0.092500806 |
| Rattus_norvegici | 223  | 284  | 129  | 186  | 184  | 55   | 2.898699  | 3.608392  | 1.668698  | 1.917588  | 2.445899  | 0.715255  | 0.645031321 | -0.727904295 |
| Rattus_norvegici | 270  | 551  | 128  | 400  | 523  | 192  | 2.191163  | 5.221708  | 0.98253   | 2.756885  | 4.74147   | 1.717443  | 0.973021055 | 0.117037524  |
| Rattus_norvegici | 312  | 228  | 286  | 190  | 83   | 85   | 0.92418   | 0.660481  | 0.84643   | 0.445631  | 0.249555  | 0.254186  | 0.249433295 | -1.395876115 |
| Rattus_norvegici | 72   | 18   | 61   | 89   | 51   | 73   | 0.628961  | 0.149908  | 0.5323    | 0.618462  | 0.454949  | 0.648872  | 0.861502576 | 0.334018445  |
| Rattus_norvegici | 47   | 52   | 96   | 155  | 97   | 134  | 0.414254  | 0.448156  | 0.844808  | 1.093242  | 0.876175  | 1.206085  | 0.582725466 | 0.83059349   |
| Rattus_norvegici | 3072 | 3175 | 3612 | 2879 | 2519 | 2360 | 13.074142 | 13.186298 | 15.360197 | 9.714237  | 10.96846  | 10.189378 | 0.363233518 | -0.483977908 |
| Rattus_norvegici | 39   | 31   | 70   | 151  | 56   | 101  | 0.771808  | 0.48566   | 0.91252   | 2.584679  | 1.200788  | 1.337748  | 0.466149849 | 0.952702504  |
| Rattus_norvegici | 94   | 70   | 130  | 52   | 19   | 19   | 1.550727  | 0.987366  | 2.248637  | 0.635509  | 0.391046  | 0.402451  | 0.076821765 | -1.916463094 |
| Rattus_norvegici | 91   | 47   | 168  | 132  | 50   | 44   | 1.090509  | 0.317083  | 1.654847  | 0.910741  | 0.701985  | 0.619207  | 0.746983611 | -0.65329597  |
| Rattus_norvegici | 4985 | 4535 | 4810 | 6620 | 4082 | 4207 | 16.267761 | 14.334144 | 15.677958 | 17.124257 | 13.630516 | 13.846523 | 0.932653683 | -0.103485196 |
| Rattus_norvegici | 302  | 376  | 267  | 270  | 316  | 328  | 0.865072  | 1.052899  | 0.764925  | 0.614184  | 0.926615  | 0.955003  | 0.930211589 | -0.158724494 |
| Rattus_norvegici | 146  | 185  | 0    | 628  | 0    | 461  | 1.021468  | 1.159944  | 0         | 3.390601  | 0         | 3.005453  | 0.50808205  | 1.527100158  |
| Rattus_norvegici | 357  | 277  | 328  | 461  | 238  | 370  | 0.932263  | 0.707658  | 0.855981  | 0.956388  | 0.636397  | 0.981583  | 0.997922749 | -0.007139246 |
| Rattus_norvegici | 452  | 410  | 256  | 814  | 544  | 385  | 2.510551  | 1.967782  | 1.227355  | 4.231503  | 3.471856  | 2.283687  | 0.690258246 | 0.478797644  |
| Rattus_norvegici | 718  | 278  | 157  | 235  | 121  | 101  | 1.345331  | 0.651923  | 0.394397  | 0.316824  | 0.313449  | 0.156928  | 0.429987231 | -1.514298914 |
| Rattus_norvegici | 81   | 74   | 55   | 68   | 75   | 56   | 0.44306   | 0.393234  | 0.297313  | 0.292916  | 0.418523  | 0.307445  | 0.929523342 | -0.201909673 |

|                  |       |       |       |       |      |       |            |            |            |            |            |            |             |              |
|------------------|-------|-------|-------|-------|------|-------|------------|------------|------------|------------|------------|------------|-------------|--------------|
| Rattus_norvegici | 1047  | 992   | 1148  | 1207  | 780  | 670   | 10.783642  | 9.966017   | 11.807163  | 9.853582   | 8.211713   | 6.999149   | 0.645468415 | -0.426425288 |
| Rattus_norvegici | 110   | 55    | 185   | 28    | 19   | 20    | 0.431965   | 0.210481   | 0.728644   | 0.084641   | 0.073167   | 0.078691   | 0.041166643 | -2.548362979 |
| Rattus_norvegici | 292   | 323   | 467   | 469   | 333  | 244   | 2.120686   | 2.211003   | 2.602679   | 1.984862   | 1.842087   | 1.909954   | 0.926035389 | -0.212795098 |
| Rattus_norvegici | 620   | 665   | 290   | 303   | 315  | 364   | 2.759978   | 3.307236   | 1.947676   | 1.202905   | 1.993964   | 2.164964   | 0.434840003 | -0.793093469 |
| Rattus_norvegici | 1491  | 1299  | 1061  | 1919  | 497  | 269   | 6.566666   | 5.581632   | 4.665532   | 6.697711   | 2.238369   | 1.200707   | 0.57672461  | -0.764685356 |
| Rattus_norvegici | 50    | 333   | 35    | 43    | 46   | 77    | 0.580438   | 2.246487   | 0.213719   | 0.22264    | 0.306213   | 0.50615    | 0.681020994 | -1.41494584  |
| Rattus_norvegici | 261   | 506   | 66    | 276   | 256  | 119   | 2.164703   | 4.090753   | 0.549454   | 1.81119    | 2.168338   | 0.993605   | 0.825147418 | -0.490026719 |
| Rattus_norvegici | 510   | 397   | 375   | 168   | 695  | 740   | 7.456239   | 4.631853   | 4.940735   | 1.798124   | 11.010784  | 11.013698  | 0.927680801 | 0.265048935  |
| Rattus_norvegici | 165   | 142   | 217   | 148   | 95   | 134   | 1.304898   | 0.869538   | 1.539969   | 0.679402   | 0.560682   | 0.789016   | 0.723776404 | -0.624560103 |
| Rattus_norvegici | 68    | 109   | 63    | 113   | 190  | 213   | 0.262939   | 0.409141   | 0.240854   | 0.343724   | 0.748765   | 0.832021   | 0.508616806 | 1.01882394   |
| Rattus_norvegici | 91    | 180   | 30    | 195   | 33   | 83    | 0.399293   | 0.90274    | 0.139412   | 0.902076   | 0.147506   | 0.423783   | 0.97859128  | -0.157983025 |
| Rattus_norvegici | 1984  | 1836  | 1849  | 1580  | 1256 | 952   | 6.527293   | 5.895706   | 6.077684   | 4.121182   | 4.225749   | 3.175235   | 0.178758501 | -0.732174909 |
| Rattus_norvegici | 13031 | 7737  | 17841 | 14214 | 9374 | 12001 | 318.604091 | 206.571548 | 427.014056 | 307.142766 | 300.075328 | 293.800729 | 0.801265592 | -0.272493629 |
| Rattus_norvegici | 25091 | 11238 | 3399  | 8055  | 3847 | 1718  | 536.314175 | 267.95657  | 82.862336  | 153.804192 | 86.951471  | 38.765517  | 0.434278574 | -1.743984254 |
| Rattus_norvegici | 45    | 71    | 64    | 60    | 101  | 52    | 0.47107    | 0.725842   | 0.666407   | 0.49603    | 1.083443   | 0.547596   | 0.972290873 | 0.137443529  |
| Rattus_norvegici | 263   | 294   | 362   | 421   | 288  | 429   | 0.778706   | 0.849583   | 1.397156   | 0.988102   | 0.870981   | 1.288717   | 0.936033701 | 0.167754863  |
| Rattus_norvegici | 0     | 284   | 338   | 21    | 196  | 188   | 0          | 1.728609   | 2.107775   | 0.102961   | 1.250726   | 1.192755   | 0.782573608 | -0.662238574 |
| Rattus_norvegici | 49    | 16    | 34    | 19    | 145  | 152   | 0.82803    | 0.239246   | 0.567661   | 0.25735    | 2.40616    | 2.557776   | 0.395137137 | 1.623723402  |
| Rattus_norvegici | 238   | 197   | 31    | 211   | 276  | 281   | 1.410443   | 1.045303   | 0.125387   | 1.152615   | 1.144815   | 1.347531   | 0.725795167 | 0.623336924  |
| Rattus_norvegici | 344   | 303   | 341   | 436   | 267  | 237   | 9.375194   | 8.067451   | 9.299909   | 9.438093   | 7.457407   | 6.552132   | 0.917184783 | -0.238749624 |
| Rattus_norvegici | 122   | 170   | 80    | 61    | 32   | 24    | 0.602108   | 0.819001   | 0.393038   | 0.239488   | 0.161852   | 0.117893   | 0.101344914 | -1.844699243 |
| Rattus_norvegici | 1778  | 1514  | 615   | 2621  | 0    | 0     | 4.000164   | 3.322574   | 1.380917   | 4.675025   | 0          | 0          | 0.820724164 | -0.914837958 |
| Rattus_norvegici | 110   | 67    | 69    | 127   | 110  | 109   | 1.264419   | 0.749735   | 0.790647   | 1.163037   | 1.292095   | 1.26986    | 0.871460963 | 0.355574629  |
| Rattus_norvegici | 190   | 152   | 114   | 282   | 50   | 81    | 0.907087   | 0.589118   | 0.277589   | 0.668332   | 0.284621   | 0.546184   | 0.900969284 | -0.378396391 |
| Rattus_norvegici | 563   | 468   | 633   | 352   | 238  | 242   | 2.790537   | 2.414131   | 3.542161   | 1.485973   | 1.18261    | 1.425371   | 0.217706998 | -1.156457032 |
| Rattus_norvegici | 154   | 186   | 190   | 664   | 226  | 398   | 2.018942   | 2.449942   | 1.761944   | 7.273673   | 2.533569   | 3.595016   | 0.298937634 | 1.096684042  |
| Rattus_norvegici | 136   | 109   | 152   | 468   | 82   | 411   | 1.054336   | 0.464287   | 1.298769   | 2.535772   | 0.35959    | 3.756815   | 0.387512498 | 1.093966804  |
| Rattus_norvegici | 76    | 71    | 72    | 141   | 121  | 115   | 2.218459   | 2.026493   | 2.082226   | 3.267793   | 3.62737    | 3.396418   | 0.708129858 | 0.645561712  |
| Rattus_norvegici | 77    | 75    | 63    | 227   | 127  | 309   | 0.760744   | 0.717019   | 0.558564   | 1.772481   | 1.310458   | 3.353184   | 0.217018861 | 1.494319855  |
| Rattus_norvegici | 79    | 50    | 45    | 74    | 52   | 45    | 0.766418   | 0.469554   | 0.436509   | 0.56985    | 0.512512   | 0.437925   | 0.948040737 | -0.18040222  |
| Rattus_norvegici | 47    | 16    | 77    | 43    | 5    | 64    | 2.044914   | 0.643327   | 3.352365   | 1.547894   | 0.217125   | 2.869109   | 0.863925756 | -0.483469583 |
| Rattus_norvegici | 1882  | 3190  | 1662  | 6460  | 2400 | 3298  | 6.310172   | 10.39708   | 5.6164     | 16.878338  | 7.102068   | 10.843159  | 0.394201992 | 0.67102835   |
| Rattus_norvegici | 0     | 99    | 51    | 215   | 97   | 103   | 0          | 1.378243   | 0.727732   | 2.447209   | 1.423658   | 1.49653    | 0.28964917  | 1.295664984  |
| Rattus_norvegici | 507   | 393   | 456   | 760   | 322  | 396   | 11.646708  | 7.964096   | 10.919213  | 12.001196  | 6.850033   | 9.294873   | 0.994833861 | -0.060003338 |
| Rattus_norvegici | 40    | 43    | 31    | 98    | 132  | 120   | 0.305428   | 0.275288   | 0.201642   | 0.514882   | 0.89407    | 1.083152   | 0.206189578 | 1.512589198  |
| Rattus_norvegici | 433   | 532   | 586   | 549   | 435  | 320   | 4.956662   | 5.912492   | 6.66925    | 5.011116   | 5.165564   | 3.723823   | 0.777952814 | -0.402649645 |
| Rattus_norvegici | 422   | 265   | 403   | 471   | 169  | 302   | 4.278528   | 2.66764    | 3.99088    | 3.675338   | 1.654696   | 3.11829    | 0.834962634 | -0.394053389 |
| Rattus_norvegici | 230   | 207   | 240   | 291   | 174  | 207   | 3.080462   | 2.81593    | 3.626429   | 3.041903   | 2.46631    | 2.958136   | 0.952905061 | -0.169313029 |
| Rattus_norvegici | 38    | 22    | 8     | 78    | 47   | 78    | 0.818579   | 0.461555   | 0.131635   | 1.302484   | 0.986185   | 1.56283    | 0.14903008  | 1.440186676  |
| Rattus_norvegici | 96    | 196   | 120   | 389   | 420  | 533   | 0.59975    | 1.365408   | 0.829193   | 2.048206   | 3.114472   | 3.74336    | 0.108183878 | 1.596239174  |
| Rattus_norvegici | 89    | 38    | 113   | 112   | 66   | 87    | 1.143282   | 0.476449   | 1.453079   | 1.14016    | 0.86853    | 1.138179   | 1           | -0.021005522 |
| Rattus_norvegici | 2103  | 2721  | 1769  | 2593  | 2275 | 2089  | 18.58355   | 23.382908  | 16.002489  | 18.325569  | 20.901884  | 19.51995   | 0.958108188 | -0.055316621 |
| Rattus_norvegici | 991   | 664   | 120   | 51    | 27   | 256   | 2.050663   | 1.342288   | 0.246453   | 0.080759   | 0.056879   | 1.135638   | 0.173352975 | -2.481232618 |
| Rattus_norvegici | 273   | 170   | 280   | 154   | 36   | 91    | 1.440914   | 0.874125   | 1.476609   | 0.644727   | 0.191153   | 0.484573   | 0.197725241 | -1.563799554 |
| Rattus_norvegici | 4     | 84    | 82    | 0     | 112  | 41    | 0.032294   | 0.50619    | 0.413486   | 0          | 0.792189   | 0.523653   | 0.94733636  | -0.171950132 |
| Rattus_norvegici | 11999 | 4760  | 13346 | 7288  | 8196 | 7697  | 35.426506  | 13.496154  | 36.810711  | 15.849805  | 24.748882  | 21.423979  | 0.614983109 | -0.505554105 |
| Rattus_norvegici | 24    | 298   | 176   | 111   | 6    | 128   | 0.067946   | 0.842166   | 0.508504   | 0.255236   | 0.017267   | 0.375779   | 0.612856675 | -1.184308022 |
| Rattus_norvegici | 26    | 56    | 19    | 24    | 96   | 65    | 0.287404   | 0.624714   | 0.211834   | 0.213608   | 1.12645    | 0.754632   | 0.681730257 | 0.822265331  |
| Rattus_norvegici | 22    | 69    | 38    | 77    | 83   | 93    | 0.250698   | 0.908271   | 0.44629    | 0.715743   | 1.167638   | 1.103382   | 0.560220596 | 0.862453378  |
| Rattus_norvegici | 357   | 174   | 620   | 98    | 85   | 50    | 1.64286    | 0.778388   | 3.011927   | 0.354779   | 0.397569   | 0.230424   | 0.060907582 | -2.466831284 |
| Rattus_norvegici | 298   | 246   | 353   | 204   | 208  | 188   | 2.924411   | 2.358532   | 3.439764   | 1.574179   | 2.081167   | 1.846933   | 0.612211558 | -0.711006733 |

|                  |      |      |      |      |      |      |           |           |           |           |           |           |             |              |
|------------------|------|------|------|------|------|------|-----------|-----------|-----------|-----------|-----------|-----------|-------------|--------------|
| Rattus_norvegici | 0    | 219  | 35   | 63   | 16   | 218  | 0         | 0.797126  | 0.129797  | 0.184749  | 0.058773  | 0.826243  | 0.990515994 | 0.151508177  |
| Rattus_norvegici | 1055 | 1084 | 518  | 1624 | 1419 | 908  | 1.548895  | 1.538125  | 0.752639  | 1.87387   | 2.127487  | 1.339239  | 0.592543871 | 0.430933653  |
| Rattus_norvegici | 8    | 18   | 98   | 126  | 370  | 153  | 0.031656  | 0.140243  | 0.404924  | 0.655544  | 2.159759  | 0.918383  | 0.1972347   | 2.289683923  |
| Rattus_norvegici | 32   | 99   | 70   | 364  | 149  | 129  | 0.508489  | 0.456288  | 0.662288  | 1.440918  | 0.830681  | 0.735769  | 0.201595998 | 1.481893217  |
| Rattus_norvegici | 39   | 42   | 34   | 75   | 56   | 52   | 1.050363  | 1.111375  | 0.926852  | 1.611589  | 1.541809  | 1.439744  | 0.742166712 | 0.523423577  |
| Rattus_norvegici | 80   | 114  | 195  | 90   | 41   | 57   | 0.22728   | 0.316549  | 0.554317  | 0.202439  | 0.118727  | 0.164571  | 0.36812368  | -1.226963533 |
| Rattus_norvegici | 279  | 310  | 158  | 193  | 23   | 44   | 0.867984  | 1.044451  | 0.44763   | 0.622428  | 0.06555   | 0.16117   | 0.138069578 | -1.774150617 |
| Rattus_norvegici | 94   | 343  | 57   | 522  | 148  | 105  | 0.278157  | 1.915535  | 0.172389  | 1.69672   | 0.464658  | 0.378738  | 0.865714786 | 0.435207219  |
| Rattus_norvegici | 653  | 572  | 403  | 916  | 206  | 81   | 3.056599  | 3.293019  | 1.840265  | 3.022061  | 0.86594   | 0.242273  | 0.726028184 | -0.694943735 |
| Rattus_norvegici | 612  | 864  | 445  | 623  | 308  | 286  | 5.584615  | 7.687641  | 4.052026  | 4.502615  | 2.867851  | 2.642221  | 0.399833201 | -0.832818221 |
| Rattus_norvegici | 85   | 40   | 79   | 86   | 123  | 3023 | 0.337049  | 0.153133  | 0.311643  | 0.269307  | 0.495674  | 12.171793 | 0.550535135 | 3.933872102  |
| Rattus_norvegici | 51   | 41   | 62   | 86   | 134  | 262  | 0.194915  | 0.210384  | 0.516377  | 0.370602  | 0.528305  | 1.213055  | 0.267102928 | 1.559588331  |
| Rattus_norvegici | 50   | 55   | 33   | 53   | 33   | 79   | 0.311951  | 0.336239  | 0.209034  | 0.263143  | 0.213024  | 0.505994  | 0.965876353 | 0.137065226  |
| Rattus_norvegici | 160  | 90   | 405  | 277  | 334  | 721  | 0.805041  | 0.439095  | 2.041715  | 1.156459  | 1.760743  | 3.82895   | 0.608904475 | 0.918140382  |
| Rattus_norvegici | 1020 | 1749 | 754  | 1534 | 1210 | 992  | 6.355599  | 10.273407 | 4.889249  | 8.302738  | 9.360115  | 6.52286   | 0.969617293 | -0.055105173 |
| Rattus_norvegici | 40   | 61   | 3    | 74   | 63   | 52   | 0.86776   | 1.317419  | 0.058546  | 1.292222  | 1.416414  | 1.163736  | 0.60318987  | 0.736155422  |
| Rattus_norvegici | 70   | 191  | 10   | 105  | 200  | 52   | 2.049009  | 4.679564  | 0.235749  | 2.12862   | 5.162615  | 1.314521  | 0.94404387  | 0.31034212   |
| Rattus_norvegici | 128  | 95   | 188  | 305  | 132  | 97   | 1.338844  | 0.963057  | 1.986349  | 2.550622  | 1.396259  | 1.036826  | 0.923878281 | 0.171446504  |
| Rattus_norvegici | 196  | 152  | 195  | 76   | 31   | 87   | 1.081108  | 0.791543  | 1.072917  | 0.338034  | 0.174495  | 0.474146  | 0.167394472 | -1.634857885 |
| Rattus_norvegici | 69   | 78   | 76   | 41   | 35   | 18   | 0.436007  | 0.485976  | 0.485755  | 0.203941  | 0.223904  | 0.110851  | 0.203922359 | -1.400944901 |
| Rattus_norvegici | 118  | 120  | 216  | 191  | 48   | 38   | 0.546146  | 0.526747  | 0.981051  | 0.731901  | 0.213992  | 0.175079  | 0.579420284 | -0.957499442 |
| Rattus_norvegici | 93   | 103  | 115  | 103  | 11   | 26   | 1.462684  | 1.434327  | 1.830752  | 1.276957  | 0.114753  | 0.325767  | 0.290662731 | -1.408429454 |
| Rattus_norvegici | 1841 | 2610 | 578  | 455  | 1055 | 463  | 11.031574 | 11.020651 | 3.055275  | 1.98139   | 4.247931  | 1.94324   | 0.265433274 | -1.428135857 |
| Rattus_norvegici | 101  | 69   | 105  | 137  | 75   | 93   | 1.434965  | 1.118263  | 2.001966  | 0.877007  | 0.615748  | 0.762887  | 1           | -0.017048261 |
| Rattus_norvegici | 213  | 247  | 250  | 139  | 152  | 137  | 1.430292  | 1.354128  | 1.186731  | 0.8007    | 1.147449  | 1.036841  | 0.542567089 | -0.852743907 |
| Rattus_norvegici | 509  | 761  | 673  | 528  | 386  | 580  | 10.945506 | 16.038307 | 14.511827 | 9.003684  | 8.480219  | 12.921073 | 0.632647573 | -0.510946021 |
| Rattus_norvegici | 551  | 807  | 528  | 737  | 611  | 972  | 5.026388  | 7.3418    | 4.573299  | 6.53354   | 6.94737   | 11.1101   | 0.916587838 | 0.18064064   |
| Rattus_norvegici | 441  | 489  | 465  | 640  | 629  | 625  | 3.507901  | 3.655639  | 3.71773   | 3.42527   | 4.321265  | 4.237916  | 0.83211686  | 0.314789018  |
| Rattus_norvegici | 95   | 64   | 105  | 91   | 170  | 312  | 1.045495  | 0.671493  | 1.081089  | 0.730731  | 1.807259  | 3.27836   | 0.507006685 | 1.036845846  |
| Rattus_norvegici | 150  | 72   | 265  | 27   | 31   | 76   | 1.126621  | 0.515175  | 1.807808  | 0.122869  | 0.23461   | 0.545134  | 0.146693568 | -1.963852902 |
| Rattus_norvegici | 450  | 245  | 1375 | 16   | 43   | 8    | 3.707124  | 1.731527  | 8.672737  | 0.064684  | 0.181524  | 0.033006  | 0.042035709 | -5.055883438 |
| Rattus_norvegici | 215  | 287  | 121  | 224  | 71   | 224  | 1.211231  | 1.820126  | 0.673542  | 0.958369  | 0.383679  | 1.223514  | 0.835891406 | -0.415266037 |
| Rattus_norvegici | 190  | 170  | 267  | 141  | 53   | 59   | 1.955547  | 1.578315  | 2.658232  | 0.94656   | 0.452528  | 0.527068  | 0.230934092 | -1.510139268 |
| Rattus_norvegici | 104  | 50   | 21   | 66   | 56   | 75   | 0.897323  | 0.419712  | 0.178975  | 0.451326  | 0.494978  | 0.653792  | 0.994432151 | 0.047705252  |
| Rattus_norvegici | 250  | 126  | 182  | 262  | 93   | 163  | 3.701508  | 1.901211  | 2.343268  | 2.879999  | 1.629353  | 2.777287  | 0.91571245  | -0.29198992  |
| Rattus_norvegici | 135  | 339  | 496  | 925  | 429  | 660  | 2.01485   | 5.801084  | 8.740115  | 12.979067 | 8.059109  | 11.935311 | 0.330623941 | 0.883451751  |
| Rattus_norvegici | 80   | 171  | 109  | 132  | 118  | 42   | 0.636645  | 1.941844  | 1.052083  | 0.85998   | 0.722461  | 0.523641  | 0.828992189 | -0.455240221 |
| Rattus_norvegici | 220  | 194  | 126  | 346  | 257  | 194  | 7.307389  | 6.283167  | 4.177197  | 9.117589  | 8.743913  | 6.52026   | 0.824520775 | 0.409539267  |
| Rattus_norvegici | 481  | 2167 | 13   | 1069 | 348  | 255  | 16.754045 | 73.709747 | 0.434146  | 29.536934 | 12.388171 | 9.006218  | 0.85120985  | -0.866403656 |
| Rattus_norvegici | 302  | 297  | 205  | 269  | 136  | 91   | 2.593291  | 2.189724  | 1.873853  | 1.655601  | 1.0667    | 0.672368  | 0.549989628 | -0.883246569 |
| Rattus_norvegici | 736  | 1003 | 800  | 1612 | 1222 | 1594 | 7.716922  | 9.689117  | 7.975827  | 14.45627  | 13.047957 | 17.102985 | 0.301890901 | 0.668862355  |
| Rattus_norvegici | 407  | 479  | 484  | 488  | 375  | 379  | 13.116891 | 14.463767 | 15.999611 | 15.229768 | 11.321795 | 15.307809 | 0.863766916 | -0.285493633 |
| Rattus_norvegici | 290  | 320  | 316  | 324  | 106  | 98   | 7.383949  | 5.745481  | 8.707749  | 4.731219  | 1.992415  | 2.792217  | 0.454805723 | -1.024105718 |
| Rattus_norvegici | 92   | 88   | 147  | 150  | 149  | 145  | 4.136933  | 3.879437  | 6.604688  | 5.377172  | 6.876727  | 6.615478  | 0.895539689 | 0.309041046  |
| Rattus_norvegici | 79   | 156  | 96   | 149  | 164  | 173  | 3.446595  | 6.291519  | 4.217075  | 5.158856  | 7.084938  | 7.980611  | 0.839412284 | 0.442354721  |
| Rattus_norvegici | 45   | 46   | 76   | 89   | 74   | 46   | 0.466703  | 0.469739  | 0.790681  | 0.739421  | 0.790963  | 0.479871  | 0.942241434 | 0.165953171  |
| Rattus_norvegici | 131  | 121  | 109  | 375  | 363  | 220  | 7.061617  | 6.384783  | 5.895488  | 16.121399 | 20.121599 | 12.101326 | 0.278670679 | 1.267449021  |
| Rattus_norvegici | 1170 | 1236 | 471  | 2069 | 811  | 506  | 44.290352 | 45.668697 | 17.806192 | 62.11869  | 31.405872 | 19.408056 | 0.970555041 | 0.031039796  |
| Rattus_norvegici | 29   | 51   | 50   | 40   | 78   | 71   | 0.404133  | 0.911424  | 0.716158  | 0.472156  | 1.15011   | 1.045758  | 0.830788821 | 0.45212766   |
| Rattus_norvegici | 10   | 38   | 91   | 94   | 24   | 92   | 0.078602  | 0.30061   | 0.744969  | 0.607247  | 0.198784  | 0.762504  | 0.855498398 | 0.419094238  |
| Rattus_norvegici | 36   | 13   | 55   | 4    | 49   | 152  | 1.959987  | 0.388757  | 2.580233  | 0.166996  | 1.696386  | 8.176484  | 0.818143796 | 0.92780512   |

|                  |      |      |      |      |      |      |           |           |           |            |           |           |             |              |
|------------------|------|------|------|------|------|------|-----------|-----------|-----------|------------|-----------|-----------|-------------|--------------|
| Rattus_norvegici | 193  | 198  | 297  | 126  | 95   | 58   | 4.216773  | 4.23581   | 6.490982  | 2.178826   | 2.132002  | 1.274989  | 0.226909838 | -1.466862489 |
| Rattus_norvegici | 51   | 76   | 47   | 51   | 66   | 49   | 2.040476  | 2.994603  | 1.890714  | 1.609271   | 2.738291  | 1.999575  | 0.931198996 | -0.178920752 |
| Rattus_norvegici | 81   | 126  | 396  | 15   | 0    | 10   | 0.660164  | 1.010018  | 3.265049  | 0.090289   | 0         | 0.075599  | 0.051087253 | -4.820423835 |
| Rattus_norvegici | 294  | 340  | 276  | 348  | 254  | 305  | 7.249344  | 8.188221  | 6.805391  | 6.828956   | 6.587059  | 7.731897  | 0.950323204 | -0.144399683 |
| Rattus_norvegici | 31   | 52   | 34   | 102  | 39   | 58   | 0.443058  | 0.740038  | 0.493176  | 1.188193   | 0.576924  | 0.863316  | 0.679175666 | 0.588401908  |
| Rattus_norvegici | 60   | 142  | 25   | 67   | 7    | 16   | 0.339606  | 0.787069  | 0.137197  | 0.297646   | 0.035104  | 0.09217   | 0.49564733  | -1.577205452 |
| Rattus_norvegici | 99   | 64   | 238  | 28   | 86   | 49   | 2.009238  | 1.479964  | 4.798544  | 0.510204   | 1.180739  | 1.447183  | 0.398488639 | -1.385836047 |
| Rattus_norvegici | 342  | 332  | 212  | 158  | 219  | 162  | 1.439969  | 1.710235  | 1.284079  | 0.580772   | 1.47201   | 0.626973  | 0.525529836 | -0.824986384 |
| Rattus_norvegici | 145  | 76   | 56   | 155  | 113  | 114  | 3.943473  | 1.995958  | 1.521095  | 3.34135    | 3.122036  | 3.100537  | 0.885653226 | 0.31731436   |
| Rattus_norvegici | 79   | 44   | 29   | 184  | 128  | 109  | 2.935599  | 1.924991  | 1.299807  | 5.752428   | 5.090994  | 4.376153  | 0.289634456 | 1.315086036  |
| Rattus_norvegici | 141  | 120  | 142  | 119  | 64   | 82   | 0.987174  | 0.817251  | 0.993559  | 0.657046   | 0.454436  | 0.579607  | 0.646551965 | -0.768893273 |
| Rattus_norvegici | 51   | 51   | 113  | 56   | 65   | 58   | 0.224341  | 0.222041  | 0.50037   | 0.19597    | 0.295527  | 0.258977  | 0.836785622 | -0.391738163 |
| Rattus_norvegici | 42   | 93   | 81   | 77   | 125  | 101  | 0.430825  | 0.933359  | 0.826974  | 0.636305   | 1.366036  | 1.060132  | 0.871149152 | 0.389925949  |
| Rattus_norvegici | 427  | 492  | 330  | 514  | 416  | 365  | 1.562194  | 1.900909  | 1.173355  | 1.477877   | 1.563498  | 1.278599  | 0.968654766 | -0.088513456 |
| Rattus_norvegici | 94   | 106  | 113  | 128  | 69   | 83   | 0.915164  | 1.190992  | 1.128386  | 1.0911     | 0.838957  | 0.953982  | 0.895541179 | -0.325986221 |
| Rattus_norvegici | 88   | 100  | 132  | 67   | 60   | 97   | 0.711232  | 0.782706  | 1.064187  | 0.429322   | 0.490543  | 0.789432  | 0.700712703 | -0.634771969 |
| Rattus_norvegici | 88   | 59   | 335  | 38   | 28   | 10   | 0.465157  | 0.295237  | 1.712736  | 0.147705   | 0.138264  | 0.050176  | 0.301431521 | -2.856292875 |
| Rattus_norvegici | 41   | 53   | 41   | 57   | 70   | 47   | 0.274935  | 0.351812  | 0.27737   | 0.307815   | 0.486122  | 0.319833  | 0.920227594 | 0.246862324  |
| Rattus_norvegici | 306  | 57   | 90   | 414  | 0    | 269  | 5.842147  | 1.200657  | 1.754062  | 6.275738   | 0         | 5.312404  | 0.894860496 | 0.371892096  |
| Rattus_norvegici | 110  | 254  | 154  | 104  | 229  | 80   | 0.327491  | 0.741725  | 0.459604  | 0.245718   | 0.701081  | 0.242772  | 0.813200274 | -0.416657993 |
| Rattus_norvegici | 109  | 171  | 72   | 170  | 161  | 151  | 0.507598  | 0.776222  | 0.334209  | 0.627635   | 0.765882  | 0.709109  | 0.890351121 | 0.330958917  |
| Rattus_norvegici | 100  | 108  | 110  | 165  | 134  | 126  | 2.277388  | 2.403881  | 2.488733  | 3.071529   | 3.465133  | 2.895072  | 0.906852634 | 0.276057808  |
| Rattus_norvegici | 694  | 938  | 686  | 1763 | 1376 | 1175 | 3.97846   | 5.249028  | 3.933614  | 8.021379   | 8.076721  | 6.838731  | 0.228581277 | 0.751391178  |
| Rattus_norvegici | 63   | 73   | 49   | 23   | 58   | 43   | 1.447587  | 1.636866  | 1.12717   | 0.404307   | 1.358181  | 0.994832  | 0.619697547 | -0.652707499 |
| Rattus_norvegici | 42   | 37   | 72   | 113  | 111  | 137  | 0.351102  | 0.301376  | 0.598826  | 0.745613   | 0.94463   | 1.159914  | 0.400260772 | 1.130179983  |
| Rattus_norvegici | 170  | 176  | 168  | 262  | 161  | 137  | 1.073281  | 1.083328  | 1.059185  | 1.308597   | 1.039241  | 0.876813  | 0.996921053 | -0.042640825 |
| Rattus_norvegici | 55   | 60   | 59   | 0    | 49   | 49   | 0.329795  | 0.349439  | 0.349234  | 0          | 0.299005  | 0.298157  | 0.426851131 | -0.855019237 |
| Rattus_norvegici | 94   | 64   | 28   | 161  | 107  | 0    | 1.952911  | 1.289448  | 0.578546  | 2.656181   | 2.268772  | 0         | 0.895266142 | 0.328032931  |
| Rattus_norvegici | 120  | 115  | 185  | 73   | 53   | 28   | 0.900213  | 0.583769  | 1.816408  | 0.364294   | 0.288957  | 0.311471  | 0.17810754  | -1.619536223 |
| Rattus_norvegici | 1648 | 1961 | 1886 | 2321 | 1855 | 1944 | 12.722779 | 14.76775  | 14.549345 | 14.201192  | 14.646712 | 15.217957 | 0.992213996 | 0.016032317  |
| Rattus_norvegici | 166  | 36   | 286  | 125  | 111  | 41   | 1.667665  | 0.351202  | 2.883674  | 0.992137   | 1.13939   | 0.411137  | 0.637772264 | -0.991443548 |
| Rattus_norvegici | 269  | 55   | 35   | 554  | 102  | 98   | 5.294087  | 1.056693  | 0.677381  | 8.667171   | 2.04325   | 1.956371  | 0.767862692 | 0.816998717  |
| Rattus_norvegici | 4468 | 3700 | 2575 | 6650 | 3635 | 2462 | 92.959412 | 75.109703 | 53.523483 | 109.708809 | 77.371498 | 51.958805 | 0.938956869 | 0.066546749  |
| Rattus_norvegici | 50   | 33   | 73   | 75   | 21   | 4    | 0.485447  | 0.316991  | 0.709835  | 0.585275   | 0.203429  | 0.034641  | 0.6322939   | -0.906038359 |
| Rattus_norvegici | 1553 | 1443 | 1901 | 849  | 587  | 1038 | 3.34391   | 3.476587  | 4.316933  | 1.899582   | 1.29173   | 2.308389  | 0.024070598 | -1.118888421 |
| Rattus_norvegici | 597  | 119  | 414  | 306  | 613  | 261  | 1.200457  | 0.233403  | 0.832097  | 0.704538   | 1.733932  | 0.687645  | 0.979692778 | -0.045448844 |
| Rattus_norvegici | 196  | 390  | 333  | 450  | 594  | 527  | 0.381402  | 0.736165  | 0.644507  | 0.690019   | 1.178485  | 1.032722  | 0.598077398 | 0.665093882  |
| Rattus_norvegici | 235  | 74   | 29   | 59   | 29   | 16   | 0.688317  | 0.20952   | 0.084728  | 0.135176   | 0.084205  | 0.046896  | 0.497259737 | -1.894847274 |
| Rattus_norvegici | 68   | 64   | 117  | 102  | 33   | 23   | 1.056395  | 1.012037  | 2.005168  | 1.241212   | 0.470579  | 0.297692  | 0.589056703 | -0.886140846 |
| Rattus_norvegici | 116  | 69   | 134  | 57   | 63   | 49   | 0.523303  | 0.300635  | 0.600566  | 0.203234   | 0.287701  | 0.220306  | 0.43836202  | -1.048603539 |
| Rattus_norvegici | 29   | 49   | 40   | 115  | 24   | 67   | 0.432592  | 0.71409   | 0.590862  | 1.376063   | 0.359934  | 1.01961   | 0.654305728 | 0.607478624  |
| Rattus_norvegici | 40   | 63   | 30   | 251  | 71   | 131  | 0.528737  | 1.079708  | 0.442532  | 3.450788   | 1.196183  | 2.236065  | 0.16201737  | 1.579228788  |
| Rattus_norvegici | 83   | 69   | 5    | 98   | 54   | 50   | 1.706392  | 1.392289  | 0.097156  | 1.606036   | 1.13131   | 1.041274  | 0.925788948 | 0.202987459  |
| Rattus_norvegici | 110  | 89   | 286  | 98   | 25   | 52   | 0.353125  | 0.28403   | 0.887846  | 0.231256   | 0.07293   | 0.164643  | 0.319877964 | -1.681556563 |
| Rattus_norvegici | 33   | 40   | 71   | 7    | 137  | 145  | 0.366481  | 0.554299  | 0.526461  | 0.038596   | 0.958544  | 1.070801  | 0.6945715   | 0.964430049  |
| Rattus_norvegici | 231  | 167  | 1123 | 9    | 17   | 41   | 5.948144  | 4.191948  | 28.934591 | 0.164707   | 0.433351  | 1.047183  | 0.163101129 | -4.593807177 |
| Rattus_norvegici | 430  | 324  | 943  | 37   | 388  | 313  | 3.829919  | 2.472122  | 8.304746  | 0.264088   | 4.179007  | 3.199585  | 0.366718466 | -1.252377959 |
| Rattus_norvegici | 108  | 42   | 99   | 20   | 47   | 19   | 2.708741  | 1.030679  | 2.474673  | 0.384872   | 1.191416  | 0.472649  | 0.109527286 | -1.631985057 |
| Rattus_norvegici | 360  | 216  | 471  | 102  | 178  | 203  | 1.459967  | 0.855101  | 1.908972  | 0.327335   | 0.737613  | 0.835703  | 0.254048889 | -1.213025959 |
| Rattus_norvegici | 205  | 212  | 259  | 55   | 106  | 106  | 0.905098  | 0.861591  | 1.080326  | 0.208312   | 0.48623   | 0.432736  | 0.212395914 | -1.429360685 |
| Rattus_norvegici | 97   | 58   | 216  | 577  | 400  | 435  | 0.260656  | 0.151092  | 0.57945   | 1.245407   | 1.121544  | 1.205472  | 0.054407907 | 1.766273446  |

|                  |       |       |      |       |       |       |           |           |           |           |           |           |             |              |
|------------------|-------|-------|------|-------|-------|-------|-----------|-----------|-----------|-----------|-----------|-----------|-------------|--------------|
| Rattus_norvegici | 35    | 43    | 54   | 69    | 41    | 60    | 0.270548  | 0.32268   | 0.415509  | 0.416925  | 0.317566  | 0.463908  | 0.920563691 | 0.213192231  |
| Rattus_norvegici | 220   | 204   | 236  | 311   | 190   | 616   | 1.003764  | 0.916397  | 0.886229  | 1.306441  | 0.893789  | 2.435727  | 0.683182167 | 0.643746459  |
| Rattus_norvegici | 32    | 83    | 21   | 69    | 62    | 79    | 0.619452  | 1.677213  | 0.431028  | 0.986361  | 1.484977  | 1.560144  | 0.7826215   | 0.516006724  |
| Rattus_norvegici | 128   | 118   | 132  | 62    | 34    | 43    | 1.08456   | 0.949344  | 0.843683  | 0.314688  | 0.292261  | 0.266928  | 0.174505911 | -1.605841741 |
| Rattus_norvegici | 59    | 25    | 83   | 40    | 48    | 60    | 0.942717  | 0.387288  | 1.318424  | 0.4982    | 0.783491  | 0.965939  | 0.877204574 | -0.292440921 |
| Rattus_norvegici | 141   | 150   | 94   | 67    | 69    | 59    | 0.575436  | 0.598306  | 0.383302  | 0.214342  | 0.284717  | 0.241436  | 0.40873689  | -1.105071028 |
| Rattus_norvegici | 555   | 685   | 591  | 579   | 273   | 363   | 1.789843  | 2.15592   | 1.902649  | 1.480877  | 0.899333  | 1.187608  | 0.467276537 | -0.761106183 |
| Rattus_norvegici | 243   | 116   | 110  | 73    | 11    | 13    | 1.085201  | 0.503761  | 0.491709  | 0.258124  | 0.046157  | 0.054894  | 0.020708686 | -2.534023844 |
| Rattus_norvegici | 80    | 77    | 101  | 89    | 52    | 18    | 1.517322  | 1.428374  | 2.182415  | 1.574597  | 1.004154  | 0.417358  | 0.564015766 | -0.894789311 |
| Rattus_norvegici | 66    | 124   | 73   | 29    | 17    | 17    | 1.155201  | 2.122654  | 1.31249   | 0.577417  | 0.388189  | 0.364237  | 0.0202597   | -2.220379189 |
| Rattus_norvegici | 161   | 145   | 115  | 215   | 205   | 286   | 1.742712  | 1.552183  | 1.247614  | 1.748012  | 2.31399   | 3.091356  | 0.71703608  | 0.629573331  |
| Rattus_norvegici | 102   | 78    | 94   | 4     | 79    | 37    | 0.597202  | 0.604145  | 0.447906  | 0.014991  | 0.748129  | 0.176491  | 0.265433274 | -1.22532371  |
| Rattus_norvegici | 367   | 192   | 726  | 234   | 227   | 167   | 1.345146  | 0.686983  | 2.857717  | 0.694549  | 0.822485  | 0.635801  | 0.413987625 | -1.181910915 |
| Rattus_norvegici | 161   | 225   | 157  | 194   | 183   | 161   | 0.505868  | 0.692769  | 0.493012  | 0.485332  | 0.589993  | 0.513317  | 0.954846053 | -0.142787021 |
| Rattus_norvegici | 58    | 79    | 27   | 55    | 157   | 99    | 0.92345   | 1.242211  | 0.423546  | 0.700223  | 2.590616  | 1.62088   | 0.610415547 | 0.856837173  |
| Rattus_norvegici | 6737  | 6349  | 4824 | 10664 | 7323  | 10012 | 28.182865 | 25.880485 | 20.14304  | 35.354848 | 31.377181 | 42.49057  | 0.337379303 | 0.505596726  |
| Rattus_norvegici | 0     | 1173  | 1001 | 1625  | 602   | 1650  | 0         | 16.781511 | 14.677082 | 18.901888 | 9.03554   | 24.551758 | 0.672516692 | 0.682401676  |
| Rattus_norvegici | 123   | 14    | 18   | 24    | 186   | 161   | 6.085182  | 0.635594  | 0.869799  | 0.944769  | 9.441006  | 8.078969  | 0.637697217 | 1.212050187  |
| Rattus_norvegici | 102   | 75    | 275  | 72    | 22    | 135   | 0.790787  | 0.685498  | 0.994969  | 0.206702  | 0.079798  | 0.496257  | 0.583814701 | -1.12047248  |
| Rattus_norvegici | 264   | 183   | 171  | 339   | 135   | 241   | 1.05913   | 0.717194  | 0.686267  | 1.0815    | 0.552325  | 0.981189  | 0.980317334 | 0.03927024   |
| Rattus_norvegici | 156   | 175   | 155  | 206   | 185   | 194   | 3.296937  | 6.688601  | 3.26704   | 2.989104  | 7.60764   | 7.519816  | 0.964241181 | 0.13722333   |
| Rattus_norvegici | 257   | 244   | 199  | 204   | 279   | 74    | 2.782462  | 2.812342  | 1.75505   | 1.772433  | 3.164954  | 0.665047  | 0.797996109 | -0.458647181 |
| Rattus_norvegici | 823   | 964   | 284  | 691   | 125   | 84    | 4.240876  | 5.532486  | 1.385279  | 2.917262  | 0.741669  | 0.35489   | 0.325208244 | -1.456837146 |
| Rattus_norvegici | 136   | 65    | 163  | 78    | 46    | 34    | 0.580781  | 0.271616  | 0.69568   | 0.263144  | 0.199864  | 0.147098  | 0.27926295  | -1.386897985 |
| Rattus_norvegici | 74    | 81    | 519  | 0     | 2     | 0     | 0.754054  | 0.828789  | 4.403334  | 0         | 0.017176  | 0         | 0.038341374 | -8.43053056  |
| Rattus_norvegici | 676   | 507   | 554  | 688   | 236   | 223   | 4.653091  | 3.682377  | 3.020387  | 3.878815  | 1.80867   | 1.394999  | 0.477390209 | -0.809146242 |
| Rattus_norvegici | 523   | 511   | 391  | 513   | 100   | 273   | 1.34119   | 1.278373  | 1.020838  | 1.073622  | 0.262025  | 0.70775   | 0.457592104 | -0.888629493 |
| Rattus_norvegici | 10864 | 11756 | 6973 | 13515 | 18736 | 16900 | 23.291806 | 25.568206 | 15.634    | 22.161663 | 40.490617 | 37.544936 | 0.281537865 | 0.629480093  |
| Rattus_norvegici | 55    | 74    | 68   | 16    | 58    | 52    | 0.322466  | 0.426404  | 0.397607  | 0.073808  | 0.350527  | 0.30843   | 0.581553777 | -0.706837991 |
| Rattus_norvegici | 39    | 52    | 50   | 77    | 73    | 45    | 0.300961  | 0.395623  | 0.392238  | 0.475823  | 0.582146  | 0.35742   | 0.871169474 | 0.325760883  |
| Rattus_norvegici | 615   | 235   | 340  | 162   | 206   | 116   | 6.684686  | 1.90223   | 2.834327  | 1.080503  | 1.830369  | 1.279436  | 0.15401644  | -1.424771506 |
| Rattus_norvegici | 48    | 23    | 13   | 63    | 45    | 23    | 0.475287  | 0.218748  | 0.120422  | 0.494392  | 0.4535    | 0.225024  | 0.725884716 | 0.474779383  |
| Rattus_norvegici | 92    | 102   | 82   | 40    | 23    | 32    | 1.152595  | 1.25263   | 1.028448  | 0.399845  | 0.28476   | 0.398778  | 0.115870729 | -1.690402803 |
| Rattus_norvegici | 53    | 89    | 46   | 96    | 98    | 78    | 0.348413  | 0.653253  | 0.303455  | 0.499529  | 0.836839  | 0.521764  | 0.848602126 | 0.409463188  |
| Rattus_norvegici | 306   | 155   | 229  | 225   | 189   | 243   | 1.584072  | 0.602303  | 0.909316  | 0.823984  | 0.767687  | 0.991042  | 0.928066902 | -0.203838581 |
| Rattus_norvegici | 182   | 194   | 108  | 103   | 112   | 99    | 4.560179  | 4.745903  | 2.49667   | 1.90384   | 2.481623  | 2.42876   | 0.633552936 | -0.742331988 |
| Rattus_norvegici | 57    | 54    | 107  | 36    | 1     | 15    | 1.354833  | 1.2522    | 2.577807  | 0.682443  | 0.023193  | 0.361783  | 0.017180443 | -2.318684088 |
| Rattus_norvegici | 118   | 124   | 123  | 37    | 20    | 14    | 1.384373  | 1.420048  | 1.443935  | 0.345759  | 0.241746  | 0.156373  | 0.011713449 | -2.544979392 |
| Rattus_norvegici | 138   | 781   | 28   | 132   | 47    | 0     | 1.580702  | 8.72017   | 0.309889  | 1.1974    | 0.541754  | 0         | 0.563154547 | -2.629220401 |
| Rattus_norvegici | 161   | 93    | 26   | 638   | 46    | 28    | 1.296891  | 0.577915  | 0.130869  | 2.89896   | 0.604084  | 0.140672  | 0.799191695 | 1.04440348   |
| Rattus_norvegici | 100   | 117   | 92   | 75    | 53    | 109   | 0.68826   | 0.737308  | 0.593264  | 0.382894  | 0.382286  | 0.715232  | 0.782573608 | -0.503733982 |
| Rattus_norvegici | 211   | 163   | 280  | 174   | 120   | 90    | 1.411991  | 1.186433  | 2.178291  | 0.953691  | 0.828709  | 0.691785  | 0.528087817 | -0.935324217 |
| Rattus_norvegici | 62    | 317   | 103  | 94    | 12    | 14    | 0.529001  | 2.56027   | 0.780743  | 0.58226   | 0.100894  | 0.10668   | 0.338658587 | -2.262179048 |
| Rattus_norvegici | 31    | 72    | 27   | 143   | 59    | 116   | 0.245643  | 0.556946  | 0.212842  | 0.899191  | 0.479015  | 0.934905  | 0.369666256 | 1.137451389  |
| Rattus_norvegici | 668   | 665   | 597  | 577   | 437   | 550   | 4.968631  | 4.591017  | 5.444734  | 3.851899  | 3.666649  | 5.980051  | 0.69964295  | -0.439805489 |
| Rattus_norvegici | 25    | 148   | 65   | 38    | 50    | 39    | 0.199971  | 1.192784  | 0.533913  | 0.246939  | 0.423031  | 0.321876  | 0.576888872 | -1.008660269 |
| Rattus_norvegici | 508   | 152   | 31   | 538   | 466   | 37    | 3.046256  | 2.239365  | 0.823061  | 2.697754  | 3.368549  | 1.005416  | 0.895266142 | 0.418039418  |
| Rattus_norvegici | 119   | 133   | 113  | 63    | 46    | 33    | 3.045472  | 3.181784  | 2.724398  | 1.116433  | 1.426943  | 0.646924  | 0.205812525 | -1.518825841 |
| Rattus_norvegici | 1439  | 2180  | 1329 | 2356  | 1400  | 812   | 11.029092 | 9.977775  | 5.495936  | 8.017367  | 11.324073 | 3.611377  | 0.797996109 | -0.290618113 |
| Rattus_norvegici | 335   | 357   | 357  | 409   | 298   | 388   | 5.367896  | 5.57963   | 5.707435  | 5.192449  | 4.876161  | 6.312405  | 0.973689426 | -0.077074792 |
| Rattus_norvegici | 147   | 123   | 143  | 109   | 109   | 111   | 8.914589  | 7.306981  | 8.687402  | 5.219711  | 6.757752  | 6.803729  | 0.817436169 | -0.454673299 |

|                  |      |       |       |      |      |      |           |           |           |           |           |           |             |              |
|------------------|------|-------|-------|------|------|------|-----------|-----------|-----------|-----------|-----------|-----------|-------------|--------------|
| Rattus_norvegici | 181  | 124   | 105   | 164  | 132  | 100  | 3.618455  | 2.381752  | 2.384908  | 3.284091  | 3.182308  | 1.704713  | 0.942241434 | -0.198514111 |
| Rattus_norvegici | 34   | 68    | 73    | 6    | 75   | 0    | 0.757205  | 1.506614  | 1.658915  | 0.09597   | 1.735362  | 0         | 0.513701654 | -1.148635707 |
| Rattus_norvegici | 20   | 167   | 77    | 103  | 56   | 95   | 0.206579  | 1.765371  | 0.828735  | 0.885225  | 0.616148  | 1.044248  | 0.944145451 | -0.194232829 |
| Rattus_norvegici | 31   | 41    | 33    | 57   | 47   | 61   | 1.322637  | 1.703757  | 1.409353  | 1.952556  | 2.045191  | 2.6564    | 0.745867186 | 0.524120349  |
| Rattus_norvegici | 6    | 64    | 3     | 11   | 117  | 53   | 0.090787  | 0.956216  | 0.043205  | 0.126071  | 1.831694  | 0.810324  | 0.716199952 | 1.296708087  |
| Rattus_norvegici | 55   | 83    | 74    | 64   | 69   | 54   | 2.451834  | 3.608364  | 3.300473  | 2.247497  | 3.169595  | 2.459792  | 0.880098058 | -0.306744038 |
| Rattus_norvegici | 227  | 163   | 191   | 242  | 218  | 200  | 10.381807 | 7.28479   | 8.726977  | 8.775726  | 10.212463 | 9.299863  | 0.988681736 | 0.046784171  |
| Rattus_norvegici | 388  | 438   | 2     | 174  | 225  | 0    | 17.941635 | 19.770826 | 0.087946  | 6.366507  | 10.613291 | 0         | 0.636462256 | -1.187224836 |
| Rattus_norvegici | 311  | 297   | 379   | 347  | 270  | 325  | 7.030088  | 6.851475  | 9.542202  | 6.162314  | 7.187784  | 9.003078  | 0.919852148 | -0.206948959 |
| Rattus_norvegici | 193  | 325   | 339   | 67   | 50   | 215  | 0.73446   | 1.272473  | 1.193456  | 0.51536   | 0.495949  | 1.043716  | 0.175484793 | -1.460522607 |
| Rattus_norvegici | 76   | 100   | 68    | 135  | 106  | 123  | 3.413194  | 4.350252  | 3.053822  | 4.789568  | 4.86695   | 5.582438  | 0.831227599 | 0.443419868  |
| Rattus_norvegici | 308  | 174   | 721   | 42   | 96   | 95   | 2.971603  | 1.632209  | 7.070071  | 0.31485   | 0.941247  | 0.921992  | 0.146693568 | -2.461344219 |
| Rattus_norvegici | 3026 | 2990  | 2897  | 3752 | 2721 | 0    | 17.883394 | 17.241156 | 17.10507  | 17.577196 | 16.447424 | 0         | 0.618224789 | -0.658375521 |
| Rattus_norvegici | 46   | 51    | 50    | 106  | 118  | 97   | 0.511663  | 0.561757  | 0.563498  | 0.94964   | 1.370299  | 1.116841  | 0.477730578 | 1.003251395  |
| Rattus_norvegici | 111  | 108   | 97    | 10   | 130  | 116  | 1.586734  | 1.504298  | 1.382842  | 0.10797   | 1.905009  | 1.687842  | 0.830318457 | -0.34031998  |
| Rattus_norvegici | 1241 | 1739  | 1010  | 1112 | 1169 | 703  | 34.724087 | 47.469551 | 28.225021 | 24.653389 | 33.441826 | 19.93149  | 0.415899202 | -0.549043544 |
| Rattus_norvegici | 59   | 47    | 0     | 4    | 86   | 5    | 0.785878  | 0.61492   | 0         | 0.042309  | 1.183322  | 0.065516  | 0.961506365 | -0.173677642 |
| Rattus_norvegici | 76   | 93    | 49    | 105  | 150  | 143  | 0.643608  | 0.870482  | 0.560396  | 0.361441  | 1.196438  | 1.162568  | 0.653742639 | 0.770368714  |
| Rattus_norvegici | 91   | 31    | 24    | 186  | 269  | 179  | 0.615266  | 0.256256  | 0.360381  | 1.402414  | 2.369473  | 2.009812  | 0.071124625 | 2.007468265  |
| Rattus_norvegici | 104  | 63    | 66    | 213  | 246  | 307  | 1.634377  | 0.956474  | 1.032568  | 2.6523    | 3.946413  | 4.896356  | 0.169339279 | 1.60643173   |
| Rattus_norvegici | 134  | 82    | 105   | 213  | 0    | 97   | 0.849679  | 0.516147  | 0.666832  | 1.085408  | 0         | 0.620258  | 0.944145451 | -0.295389633 |
| Rattus_norvegici | 145  | 96    | 110   | 115  | 99   | 89   | 0.789057  | 0.510672  | 0.599887  | 0.496049  | 0.551319  | 0.493632  | 0.872044061 | -0.353011123 |
| Rattus_norvegici | 33   | 56    | 37    | 111  | 98   | 30   | 0.520365  | 0.88114   | 0.594979  | 1.417915  | 1.607685  | 0.486637  | 0.587837448 | 0.766026311  |
| Rattus_norvegici | 76   | 61    | 251   | 66   | 12   | 20   | 0.316561  | 0.248581  | 1.05544   | 0.219358  | 0.048774  | 0.081234  | 0.334255138 | -2.234552296 |
| Rattus_norvegici | 986  | 15923 | 10198 | 464  | 3813 | 2552 | 12.133133 | 46.08448  | 37.102023 | 1.154635  | 11.479699 | 7.618075  | 0.304847339 | -2.025697159 |
| Rattus_norvegici | 0    | 1007  | 916   | 0    | 28   | 109  | 0         | 9.499495  | 7.156101  | 0         | 0.31687   | 1.188224  | 0.093990594 | -3.842854191 |
| Rattus_norvegici | 1197 | 1562  | 1157  | 1640 | 1433 | 1209 | 11.742921 | 19.508231 | 10.700107 | 16.659116 | 10.960088 | 15.003169 | 0.994662404 | -0.00799929  |
| Rattus_norvegici | 73   | 50    | 131   | 730  | 75   | 75   | 0.776633  | 0.531707  | 1.445074  | 2.321922  | 0.835955  | 0.842575  | 0.645687762 | 1.49697175   |
| Rattus_norvegici | 81   | 77    | 73    | 97   | 122  | 79   | 2.063662  | 1.887384  | 1.841663  | 1.972787  | 3.166292  | 2.04645   | 0.927680801 | 0.246588234  |
| Rattus_norvegici | 53   | 78    | 64    | 40   | 9    | 12   | 0.808764  | 1.166727  | 0.973915  | 0.488993  | 0.127309  | 0.185315  | 0.04578161  | -1.902681535 |
| Rattus_norvegici | 323  | 332   | 320   | 355  | 203  | 267  | 1.967138  | 2.028723  | 2.106121  | 1.684969  | 1.232303  | 1.526653  | 0.827706303 | -0.39724823  |
| Rattus_norvegici | 108  | 118   | 110   | 50   | 70   | 87   | 0.477761  | 0.509783  | 0.485259  | 0.174478  | 0.315468  | 0.38707   | 0.58610838  | -0.796890335 |
| Rattus_norvegici | 366  | 362   | 260   | 320  | 271  | 354  | 18.498035 | 17.846483 | 13.114795 | 12.828264 | 14.028381 | 18.160341 | 0.920830487 | -0.189510484 |
| Rattus_norvegici | 105  | 0     | 124   | 84   | 0    | 100  | 5.268181  | 0         | 6.241191  | 3.336234  | 0         | 5.076714  | 0.895266142 | -0.503778889 |
| Rattus_norvegici | 40   | 47    | 24    | 97   | 57   | 42   | 0.857685  | 0.739624  | 0.40064   | 1.311206  | 1.239789  | 0.817267  | 0.6391876   | 0.651726507  |
| Rattus_norvegici | 56   | 119   | 68    | 54   | 38   | 33   | 0.433182  | 0.911945  | 0.533102  | 0.331192  | 0.305534  | 0.25679   | 0.379457046 | -1.10779027  |
| Rattus_norvegici | 369  | 337   | 372   | 275  | 162  | 184  | 1.461053  | 1.199092  | 1.342546  | 0.797975  | 0.831252  | 0.45245   | 0.436986779 | -0.956702475 |
| Rattus_norvegici | 105  | 63    | 124   | 183  | 320  | 77   | 1.451345  | 0.586126  | 1.704076  | 1.800079  | 3.896939  | 1.403457  | 0.617080602 | 0.868909402  |
| Rattus_norvegici | 1    | 403   | 0     | 72   | 0    | 258  | 0.00063   | 1.418354  | 0         | 0.204797  | 0         | 0.943169  | 0.956802198 | -0.360588256 |
| Rattus_norvegici | 193  | 108   | 49    | 235  | 330  | 171  | 1.598659  | 0.866343  | 0.401896  | 1.543877  | 2.795691  | 1.432512  | 0.508377202 | 0.958353435  |
| Rattus_norvegici | 15   | 16    | 53    | 22   | 88   | 64   | 0.146112  | 0.15717   | 0.540869  | 0.180321  | 0.932489  | 0.67252   | 0.621715764 | 0.97575213   |
| Rattus_norvegici | 8    | 29    | 70    | 160  | 606  | 476  | 0.025782  | 0.066792  | 0.245272  | 0.648166  | 2.663828  | 1.638279  | 0.016165261 | 3.463078515  |
| Rattus_norvegici | 2    | 57    | 8     | 0    | 70   | 58   | 0.03357   | 1.020003  | 0.129163  | 0         | 1.308832  | 1.061486  | 0.824935944 | 0.931746072  |
| Rattus_norvegici | 139  | 102   | 18    | 44   | 54   | 18   | 0.649828  | 0.467501  | 0.083306  | 0.161699  | 0.258704  | 0.082969  | 0.456020746 | -1.285104744 |
| Rattus_norvegici | 1202 | 1550  | 941   | 820  | 718  | 252  | 9.815395  | 12.348377 | 7.674838  | 5.304868  | 5.9875    | 2.079129  | 0.038316117 | -1.200506817 |
| Rattus_norvegici | 56   | 50    | 75    | 17   | 15   | 27   | 0.563447  | 0.488475  | 0.760628  | 0.130031  | 0.153165  | 0.270367  | 0.052217479 | -1.735848816 |
| Rattus_norvegici | 247  | 395   | 238   | 190  | 447  | 507  | 1.741478  | 2.602405  | 1.780967  | 1.114783  | 3.186169  | 3.736943  | 0.898767091 | 0.308227982  |
| Rattus_norvegici | 1439 | 1483  | 1538  | 1855 | 1198 | 1675 | 7.915774  | 7.924029  | 8.450268  | 8.094634  | 6.707912  | 9.220454  | 0.96649535  | -0.06127239  |
| Rattus_norvegici | 1021 | 1093  | 974   | 1199 | 953  | 1060 | 1.55569   | 1.623793  | 1.482062  | 1.701029  | 1.48462   | 1.681036  | 0.954060745 | -0.080323176 |
| Rattus_norvegici | 1155 | 402   | 843   | 886  | 915  | 649  | 5.033718  | 2.000698  | 3.725764  | 3.444612  | 4.037371  | 2.901565  | 0.94455584  | -0.10922935  |
| Rattus_norvegici | 565  | 879   | 407   | 275  | 248  | 143  | 8.017191  | 12.336765 | 5.793888  | 3.100338  | 3.643653  | 2.053431  | 0.045191326 | -1.614799757 |

|                  |      |      |       |      |      |      |           |           |           |           |           |           |             |              |
|------------------|------|------|-------|------|------|------|-----------|-----------|-----------|-----------|-----------|-----------|-------------|--------------|
| Rattus_norvegici | 148  | 151  | 147   | 259  | 108  | 105  | 3.361367  | 3.336881  | 3.34782   | 4.67653   | 2.516553  | 2.405044  | 0.984087801 | -0.110962126 |
| Rattus_norvegici | 151  | 137  | 130   | 199  | 180  | 151  | 3.303886  | 2.919208  | 2.835798  | 3.447509  | 4.029682  | 3.348286  | 0.935869012 | 0.205088728  |
| Rattus_norvegici | 982  | 1289 | 952   | 1369 | 1087 | 1170 | 19.57714  | 27.713934 | 20.543872 | 24.195929 | 24.253745 | 25.852851 | 0.984602116 | 0.033794783  |
| Rattus_norvegici | 219  | 422  | 174   | 197  | 241  | 183  | 3.144542  | 6.067868  | 2.481568  | 2.304916  | 3.620733  | 2.710652  | 0.746983611 | -0.502047363 |
| Rattus_norvegici | 120  | 143  | 90    | 361  | 274  | 256  | 0.765084  | 0.889319  | 0.57134   | 1.82438   | 1.783319  | 1.656168  | 0.326082378 | 1.19288501   |
| Rattus_norvegici | 412  | 471  | 510   | 337  | 234  | 343  | 1.07008   | 1.194288  | 1.323093  | 0.693956  | 0.620837  | 0.903245  | 0.522771806 | -0.746711353 |
| Rattus_norvegici | 179  | 94   | 1235  | 5    | 19   | 18   | 0.961198  | 0.480092  | 6.986357  | 0.02258   | 0.088065  | 0.47709   | 0.23955557  | -5.249667111 |
| Rattus_norvegici | 42   | 35   | 26    | 93   | 64   | 75   | 1.008389  | 0.814927  | 0.603249  | 2.017964  | 2.000115  | 1.901343  | 0.405391659 | 1.026881201  |
| Rattus_norvegici | 98   | 33   | 52    | 152  | 161  | 220  | 2.745872  | 0.890705  | 1.438752  | 3.375893  | 4.609463  | 6.261668  | 0.259185314 | 1.426062177  |
| Rattus_norvegici | 516  | 549  | 416   | 712  | 443  | 505  | 3.195492  | 3.316643  | 2.577271  | 3.496287  | 2.804848  | 3.171508  | 0.992805707 | 0.011676898  |
| Rattus_norvegici | 61   | 57   | 62    | 192  | 53   | 99   | 0.560641  | 0.515914  | 0.569462  | 1.415201  | 0.50566   | 0.935585  | 0.610199887 | 0.735595446  |
| Rattus_norvegici | 393  | 133  | 590   | 53   | 20   | 33   | 29.159256 | 9.596827  | 43.682728 | 3.075129  | 1.483361  | 2.440561  | 0.01550529  | -3.588014195 |
| Rattus_norvegici | 132  | 116  | 131   | 215  | 134  | 190  | 2.128012  | 2.07141   | 2.400085  | 2.81496   | 2.769464  | 3.830702  | 0.863822104 | 0.359634607  |
| Rattus_norvegici | 0    | 280  | 550   | 0    | 227  | 356  | 0         | 1.168384  | 2.354625  | 0         | 0.994705  | 1.548636  | 0.857075448 | -0.548242201 |
| Rattus_norvegici | 265  | 457  | 434   | 70   | 112  | 818  | 4.456745  | 2.654512  | 3.221036  | 0.824775  | 0.405369  | 2.963782  | 0.920028235 | -0.264175649 |
| Rattus_norvegici | 32   | 53   | 84    | 65   | 72   | 160  | 0.29605   | 0.478523  | 0.775876  | 0.478394  | 0.680269  | 1.501565  | 0.678832432 | 0.713491744  |
| Rattus_norvegici | 3109 | 1798 | 1370  | 719  | 597  | 426  | 10.789382 | 6.554548  | 6.005351  | 2.408052  | 2.504731  | 1.840437  | 0.012371755 | -1.996559031 |
| Rattus_norvegici | 663  | 671  | 699   | 1229 | 453  | 448  | 2.910423  | 3.422547  | 2.585633  | 4.392425  | 2.285892  | 2.332565  | 0.966729158 | -0.135292427 |
| Rattus_norvegici | 1010 | 970  | 834   | 1700 | 721  | 933  | 5.69027   | 5.340119  | 6.756225  | 9.258649  | 3.982426  | 6.050788  | 0.934981471 | 0.074093958  |
| Rattus_norvegici | 666  | 2430 | 516   | 225  | 42   | 62   | 9.834637  | 37.414374 | 8.056263  | 2.451761  | 0.842868  | 0.951881  | 0.124956914 | -3.677690939 |
| Rattus_norvegici | 187  | 397  | 125   | 80   | 114  | 74   | 0.35982   | 1.050839  | 0.332232  | 0.359686  | 0.468001  | 0.279574  | 0.203910945 | -1.504492936 |
| Rattus_norvegici | 42   | 9    | 8     | 87   | 67   | 61   | 1.047143  | 0.20909   | 0.19079   | 1.745133  | 1.619335  | 1.56691   | 0.066141522 | 1.717607494  |
| Rattus_norvegici | 830  | 418  | 1844  | 150  | 94   | 80   | 5.668093  | 2.781543  | 12.591066 | 0.806082  | 0.65638   | 0.548714  | 0.05752043  | -3.433630189 |
| Rattus_norvegici | 2102 | 2005 | 2029  | 2517 | 1900 | 1944 | 7.254877  | 6.785074  | 6.97814   | 6.870315  | 6.699609  | 6.85449   | 0.935457009 | -0.093096345 |
| Rattus_norvegici | 557  | 186  | 382   | 764  | 270  | 381  | 4.629135  | 1.839964  | 2.664658  | 4.166001  | 2.592113  | 2.759385  | 0.920830487 | 0.133659878  |
| Rattus_norvegici | 184  | 160  | 74    | 155  | 135  | 214  | 2.286819  | 1.939695  | 0.909894  | 1.524313  | 1.720595  | 2.700768  | 0.964241181 | 0.156139838  |
| Rattus_norvegici | 1165 | 1028 | 306   | 1485 | 898  | 853  | 4.110642  | 3.235221  | 1.868812  | 4.168209  | 3.534312  | 2.873628  | 0.86338677  | 0.216980569  |
| Rattus_norvegici | 3017 | 2488 | 1220  | 3014 | 2420 | 2363 | 45.000841 | 34.979943 | 14.491362 | 34.924568 | 33.881543 | 33.12937  | 0.952905061 | 0.07693764   |
| Rattus_norvegici | 103  | 144  | 47    | 546  | 125  | 189  | 0.413381  | 0.562385  | 0.18848   | 1.737071  | 0.512795  | 0.769082  | 0.34389513  | 1.336635414  |
| Rattus_norvegici | 44   | 114  | 26    | 370  | 69   | 138  | 0.117805  | 0.298774  | 0.068677  | 0.787796  | 0.187696  | 0.375225  | 0.376778378 | 1.439235462  |
| Rattus_norvegici | 166  | 167  | 126   | 162  | 226  | 158  | 0.555308  | 0.544908  | 0.420652  | 0.428838  | 0.773528  | 0.535951  | 0.969617293 | 0.140262405  |
| Rattus_norvegici | 784  | 946  | 686   | 1056 | 641  | 659  | 1.721117  | 2.02737   | 1.506123  | 1.839447  | 1.440795  | 1.467733  | 0.895539689 | -0.194231292 |
| Rattus_norvegici | 542  | 615  | 614   | 517  | 281  | 366  | 3.12801   | 3.915749  | 3.924757  | 3.183928  | 1.77323   | 2.299125  | 0.465327794 | -0.766269532 |
| Rattus_norvegici | 341  | 405  | 384   | 322  | 216  | 306  | 4.347678  | 5.038394  | 4.885978  | 3.248542  | 2.809231  | 3.955277  | 0.690488106 | -0.562167603 |
| Rattus_norvegici | 1406 | 4269 | 14931 | 352  | 205  | 288  | 8.312785  | 24.860213 | 93.533329 | 1.729412  | 1.353148  | 1.741179  | 0.144610164 | -4.775557423 |
| Rattus_norvegici | 117  | 162  | 128   | 101  | 86   | 35   | 0.512094  | 0.69428   | 0.562861  | 0.350054  | 0.38776   | 0.154958  | 0.477390209 | -1.031954002 |
| Rattus_norvegici | 194  | 232  | 188   | 37   | 121  | 129  | 0.711946  | 0.829976  | 0.690772  | 0.107663  | 0.452083  | 0.479318  | 0.333570972 | -1.15962461  |
| Rattus_norvegici | 116  | 55   | 145   | 55   | 18   | 28   | 1.156333  | 0.53405   | 1.445613  | 0.43322   | 0.179183  | 0.278234  | 0.097662225 | -1.847519044 |
| Rattus_norvegici | 141  | 279  | 134   | 321  | 390  | 525  | 1.175753  | 2.276628  | 1.117329  | 2.128997  | 3.338362  | 4.450214  | 0.371413664 | 1.061409938  |
| Rattus_norvegici | 93   | 89   | 50    | 33   | 19   | 21   | 0.861579  | 0.797592  | 0.456567  | 0.240962  | 0.172944  | 0.190636  | 0.065012558 | -1.825963018 |
| Rattus_norvegici | 103  | 223  | 289   | 691  | 370  | 39   | 2.062864  | 4.369981  | 5.791302  | 11.00293  | 7.593087  | 0.780415  | 0.7561044   | 0.621522772  |
| Rattus_norvegici | 692  | 558  | 814   | 585  | 357  | 386  | 3.942628  | 3.103565  | 4.637911  | 2.643321  | 2.078724  | 2.227511  | 0.395148337 | -0.799078076 |
| Rattus_norvegici | 493  | 450  | 579   | 434  | 366  | 381  | 11.786428 | 10.501081 | 13.846609 | 8.237752  | 8.953391  | 9.244217  | 0.688759028 | -0.504788941 |
| Rattus_norvegici | 230  | 185  | 1120  | 21   | 16   | 10   | 1.661223  | 1.303472  | 8.382625  | 0.119915  | 0.111808  | 0.066524  | 0.111389599 | -5.206495997 |
| Rattus_norvegici | 1177 | 894  | 1303  | 937  | 193  | 178  | 3.698958  | 2.746939  | 4.101872  | 2.335718  | 0.620237  | 0.558707  | 0.010638513 | -1.618574722 |
| Rattus_norvegici | 129  | 121  | 68    | 37   | 33   | 58   | 1.206167  | 1.611072  | 0.766518  | 0.270894  | 0.310939  | 0.545971  | 0.217706998 | -1.422638796 |
| Rattus_norvegici | 165  | 315  | 208   | 334  | 302  | 246  | 1.976489  | 3.527537  | 2.016388  | 2.02775   | 3.236253  | 2.369234  | 0.920733733 | 0.224774091  |
| Rattus_norvegici | 609  | 610  | 666   | 911  | 889  | 990  | 13.375569 | 13.080104 | 14.620932 | 15.868338 | 19.982847 | 22.06999  | 0.662211204 | 0.440832434  |
| Rattus_norvegici | 1324 | 2170 | 1529  | 1075 | 784  | 1076 | 3.592243  | 5.411659  | 3.475881  | 2.322128  | 2.403425  | 3.086231  | 0.079647266 | -0.908054512 |
| Rattus_norvegici | 313  | 325  | 218   | 124  | 194  | 113  | 1.63406   | 2.127728  | 1.130942  | 0.519778  | 1.50848   | 1.117139  | 0.353879488 | -1.095427667 |
| Rattus_norvegici | 1096 | 1432 | 234   | 480  | 206  | 101  | 11.415576 | 14.547688 | 2.434742  | 3.956411  | 2.185293  | 1.057199  | 0.20172852  | -2.0090445   |

|                  |      |      |      |      |      |      |           |           |           |           |           |           |             |              |
|------------------|------|------|------|------|------|------|-----------|-----------|-----------|-----------|-----------|-----------|-------------|--------------|
| Rattus_norvegici | 53   | 142  | 23   | 65   | 31   | 49   | 0.417818  | 1.096042  | 0.178357  | 0.402316  | 0.243501  | 0.387726  | 0.743001404 | -0.733959987 |
| Rattus_norvegici | 88   | 74   | 116  | 94   | 22   | 52   | 0.932234  | 0.866422  | 1.22986   | 0.888723  | 0.22914   | 0.558607  | 0.551742399 | -0.930220392 |
| Rattus_norvegici | 93   | 94   | 101  | 107  | 96   | 125  | 1.456032  | 1.430797  | 1.582652  | 1.333956  | 1.545398  | 1.995337  | 0.988681736 | 0.062332361  |
| Rattus_norvegici | 0    | 107  | 0    | 92   | 101  | 0    | 0         | 3.056891  | 0         | 2.001791  | 2.853521  | 0         | 0.876702124 | 0.720155067  |
| Rattus_norvegici | 79   | 21   | 156  | 71   | 77   | 150  | 1.217961  | 0.273423  | 2.229163  | 0.756484  | 1.05787   | 2.050405  | 0.980317334 | 0.103162428  |
| Rattus_norvegici | 310  | 326  | 341  | 142  | 73   | 107  | 1.168085  | 1.199232  | 1.286318  | 0.424305  | 0.279636  | 0.406532  | 0.091778568 | -1.762067765 |
| Rattus_norvegici | 171  | 263  | 253  | 243  | 29   | 116  | 0.808578  | 1.211126  | 1.194233  | 0.910948  | 0.137484  | 0.553036  | 0.486947801 | -1.04484086  |
| Rattus_norvegici | 269  | 343  | 60   | 618  | 337  | 506  | 3.134946  | 3.901601  | 0.692267  | 5.715847  | 4.014681  | 5.977413  | 0.366699174 | 0.978366672  |
| Rattus_norvegici | 685  | 519  | 255  | 800  | 697  | 862  | 7.380132  | 5.454397  | 2.73824   | 6.832947  | 7.680536  | 9.416171  | 0.581553777 | 0.570034691  |
| Rattus_norvegici | 172  | 291  | 383  | 631  | 337  | 380  | 1.709714  | 2.819593  | 3.803706  | 4.972031  | 3.427743  | 3.827478  | 0.703136451 | 0.501299256  |
| Rattus_norvegici | 96   | 113  | 114  | 108  | 77   | 113  | 1.345772  | 1.719818  | 2.061041  | 1.222785  | 1.44803   | 2.505268  | 0.916696953 | -0.252321645 |
| Rattus_norvegici | 506  | 470  | 335  | 882  | 786  | 926  | 1.754584  | 1.220231  | 0.924855  | 2.658622  | 3.094775  | 3.280744  | 0.299997121 | 0.859157251  |
| Rattus_norvegici | 69   | 82   | 44   | 230  | 126  | 201  | 1.830597  | 2.109171  | 1.179057  | 4.93428   | 3.448551  | 5.450813  | 0.273829237 | 1.368179572  |
| Rattus_norvegici | 112  | 251  | 73   | 365  | 64   | 26   | 0.503668  | 1.099815  | 0.325072  | 1.298398  | 0.290127  | 0.117617  | 0.984602116 | -0.201114181 |
| Rattus_norvegici | 26   | 160  | 57   | 348  | 62   | 85   | 0.154574  | 0.948019  | 0.346026  | 1.675278  | 0.377679  | 0.514492  | 0.731333555 | 0.796236977  |
| Rattus_norvegici | 94   | 55   | 84   | 40   | 30   | 55   | 0.73085   | 0.420717  | 0.653211  | 0.244058  | 0.235902  | 0.430228  | 0.418128709 | -1.026603353 |
| Rattus_norvegici | 233  | 13   | 86   | 96   | 417  | 404  | 1.064811  | 0.054612  | 0.391216  | 0.344648  | 1.950049  | 1.871643  | 0.451908017 | 1.400697296  |
| Rattus_norvegici | 71   | 32   | 52   | 18   | 62   | 39   | 2.470039  | 1.07959   | 1.782511  | 0.469294  | 2.173232  | 1.345788  | 0.746983611 | -0.454155362 |
| Rattus_norvegici | 98   | 79   | 234  | 102  | 47   | 101  | 0.346934  | 0.27825   | 1.01991   | 0.539308  | 0.169836  | 0.375585  | 0.579197841 | -0.879981747 |
| Rattus_norvegici | 67   | 16   | 19   | 60   | 173  | 89   | 0.601745  | 0.131148  | 0.163139  | 0.414354  | 1.603768  | 0.806696  | 0.321733524 | 1.578553695  |
| Rattus_norvegici | 37   | 46   | 21   | 131  | 92   | 131  | 0.458495  | 0.552468  | 0.251639  | 1.296703  | 1.169443  | 1.665653  | 0.146693568 | 1.636169505  |
| Rattus_norvegici | 86   | 102  | 89   | 71   | 70   | 70   | 0.90815   | 0.940224  | 0.791913  | 0.501609  | 0.676335  | 0.70973   | 0.774448082 | -0.517684839 |
| Rattus_norvegici | 127  | 90   | 97   | 111  | 107  | 108  | 6.983085  | 4.813316  | 5.391241  | 4.877606  | 6.00918   | 6.044641  | 0.978273174 | -0.074640612 |
| Rattus_norvegici | 8    | 68   | 222  | 379  | 2    | 530  | 0.088163  | 0.798151  | 2.382487  | 3.521372  | 0.02271   | 6.583984  | 0.604166556 | 1.43840986   |
| Rattus_norvegici | 223  | 275  | 184  | 313  | 150  | 198  | 2.134894  | 3.320647  | 1.190198  | 2.398308  | 1.892725  | 1.772019  | 0.937914055 | -0.211126278 |
| Rattus_norvegici | 71   | 31   | 65   | 67   | 47   | 49   | 0.57377   | 0.237917  | 0.788602  | 0.418864  | 0.460122  | 0.390708  | 0.94404387  | -0.191271714 |
| Rattus_norvegici | 60   | 78   | 92   | 680  | 27   | 21   | 0.134879  | 0.169778  | 0.204513  | 1.210678  | 0.061073  | 0.046355  | 0.769709973 | 1.338519136  |
| Rattus_norvegici | 522  | 617  | 560  | 1085 | 736  | 843  | 2.402161  | 2.770994  | 2.577497  | 3.962268  | 3.468166  | 3.939529  | 0.596960112 | 0.501082743  |
| Rattus_norvegici | 171  | 138  | 338  | 108  | 82   | 70   | 0.372907  | 0.279929  | 0.726827  | 0.170843  | 0.175589  | 0.148941  | 0.226185558 | -1.474822929 |
| Rattus_norvegici | 87   | 0    | 0    | 707  | 53   | 0    | 0.310597  | 0         | 0         | 2.016275  | 0.193778  | 0         | 0.608904475 | 2.804824885  |
| Rattus_norvegici | 115  | 174  | 23   | 101  | 99   | 60   | 4.160048  | 5.604861  | 0.708505  | 2.639545  | 3.680534  | 1.98073   | 0.846439561 | -0.388750659 |
| Rattus_norvegici | 96   | 246  | 0    | 117  | 159  | 54   | 4.299764  | 10.759215 | 0         | 4.149146  | 7.271456  | 2.435205  | 0.964241181 | -0.156947791 |
| Rattus_norvegici | 55   | 136  | 24   | 139  | 39   | 27   | 0.597174  | 0.991017  | 0.359512  | 1.138307  | 0.502857  | 0.386286  | 0.952918373 | -0.286657887 |
| Rattus_norvegici | 131  | 44   | 57   | 103  | 77   | 29   | 5.117452  | 1.651214  | 2.224433  | 3.178515  | 3.112092  | 1.158851  | 0.896406474 | -0.325237702 |
| Rattus_norvegici | 133  | 82   | 88   | 3    | 58   | 29   | 0.470674  | 0.283835  | 0.310711  | 0.006184  | 0.505284  | 0.102217  | 0.071879572 | -1.784878398 |
| Rattus_norvegici | 276  | 269  | 279  | 356  | 337  | 333  | 10.782402 | 10.247093 | 10.907258 | 11.042082 | 13.496586 | 13.188183 | 0.934671343 | 0.186209587  |
| Rattus_norvegici | 695  | 810  | 679  | 875  | 523  | 528  | 7.310153  | 8.310648  | 7.13673   | 7.298568  | 5.62991   | 5.634919  | 0.790154287 | -0.342608086 |
| Rattus_norvegici | 150  | 145  | 138  | 248  | 247  | 236  | 1.060172  | 0.998432  | 0.973705  | 1.390375  | 1.791984  | 1.698062  | 0.707677307 | 0.628746458  |
| Rattus_norvegici | 220  | 96   | 171  | 224  | 111  | 117  | 1.997109  | 0.839645  | 1.540165  | 1.632035  | 1.039228  | 1.071879  | 0.917516209 | -0.289027255 |
| Rattus_norvegici | 1358 | 1294 | 1448 | 2147 | 1629 | 966  | 6.949626  | 5.308017  | 4.762868  | 5.770201  | 7.424782  | 3.660451  | 0.958955057 | 0.04798925   |
| Rattus_norvegici | 4361 | 3815 | 3803 | 8092 | 4848 | 3025 | 9.801728  | 7.328588  | 9.058191  | 13.015506 | 12.733754 | 6.797483  | 0.736401936 | 0.236185666  |
| Rattus_norvegici | 37   | 123  | 163  | 164  | 159  | 13   | 0.196282  | 0.387277  | 0.81169   | 0.667667  | 0.523693  | 0.040439  | 0.980317334 | -0.114021076 |
| Rattus_norvegici | 136  | 140  | 98   | 486  | 334  | 508  | 0.577366  | 0.579524  | 0.413363  | 1.225216  | 0.970425  | 1.655283  | 0.07980121  | 1.69415232   |
| Rattus_norvegici | 602  | 349  | 311  | 375  | 126  | 193  | 5.512874  | 3.660573  | 3.443516  | 2.908941  | 1.168825  | 2.318138  | 0.360635168 | -1.053967256 |
| Rattus_norvegici | 88   | 97   | 56   | 63   | 33   | 76   | 0.686453  | 0.735092  | 0.43796   | 0.389871  | 0.260168  | 0.599555  | 0.703343398 | -0.62051299  |
| Rattus_norvegici | 99   | 111  | 77   | 199  | 91   | 159  | 0.649407  | 0.713819  | 0.502908  | 1.038571  | 0.609844  | 1.064739  | 0.796414201 | 0.487614674  |
| Rattus_norvegici | 93   | 84   | 87   | 115  | 100  | 23   | 1.262955  | 1.112362  | 1.17988   | 1.239219  | 1.394043  | 0.311803  | 0.898767091 | -0.317807259 |
| Rattus_norvegici | 93   | 82   | 167  | 48   | 8    | 66   | 0.451709  | 0.3901    | 0.814945  | 0.183637  | 0.039927  | 0.325427  | 0.152623397 | -1.645001601 |
| Rattus_norvegici | 321  | 305  | 251  | 313  | 184  | 249  | 6.620744  | 6.122201  | 5.158943  | 5.11709   | 3.865624  | 5.193442  | 0.835457416 | -0.385014283 |
| Rattus_norvegici | 2085 | 1702 | 1543 | 3757 | 2403 | 2407 | 38.887249 | 30.968267 | 28.760546 | 55.551346 | 45.849129 | 45.541401 | 0.313337532 | 0.527215079  |
| Rattus_norvegici | 364  | 313  | 309  | 137  | 56   | 139  | 2.140332  | 1.798253  | 1.818592  | 0.638939  | 0.33306   | 0.826407  | 0.098155241 | -1.723823683 |

|                  |       |       |      |       |      |      |           |           |           |           |           |           |             |              |
|------------------|-------|-------|------|-------|------|------|-----------|-----------|-----------|-----------|-----------|-----------|-------------|--------------|
| Rattus_norvegici | 136   | 88    | 79   | 546   | 203  | 365  | 1.049038  | 0.657963  | 0.605009  | 3.350376  | 1.601187  | 2.860554  | 0.090763343 | 1.702513552  |
| Rattus_norvegici | 41    | 40    | 37   | 109   | 59   | 52   | 0.443352  | 0.420299  | 0.396964  | 0.928438  | 0.645275  | 0.560268  | 0.596113627 | 0.723798045  |
| Rattus_norvegici | 719   | 1168  | 6719 | 100   | 62   | 30   | 1.883496  | 2.209984  | 13.92434  | 0.423072  | 0.130117  | 0.03016   | 0.15401644  | -5.686944126 |
| Rattus_norvegici | 272   | 391   | 32   | 278   | 419  | 137  | 1.587575  | 2.971916  | 0.158021  | 1.711495  | 3.686472  | 0.769567  | 0.969617293 | 0.157673299  |
| Rattus_norvegici | 55    | 50    | 98   | 63    | 12   | 17   | 1.005256  | 0.76188   | 1.797996  | 0.833862  | 0.192217  | 0.326585  | 0.23846683  | -1.386984098 |
| Rattus_norvegici | 23    | 46    | 22   | 6846  | 227  | 389  | 0.110757  | 0.450297  | 0.210098  | 29.683054 | 1.740111  | 3.82413   | 0.277079454 | 6.049174864  |
| Rattus_norvegici | 78    | 82    | 69   | 42    | 25   | 37   | 1.556302  | 1.606185  | 1.381085  | 0.666366  | 0.512861  | 0.745895  | 0.263172815 | -1.28592082  |
| Rattus_norvegici | 677   | 500   | 770  | 314   | 254  | 201  | 2.15801   | 1.562367  | 2.726809  | 0.784417  | 1.740535  | 0.643858  | 0.063436479 | -1.492316984 |
| Rattus_norvegici | 3043  | 2839  | 2199 | 2755  | 958  | 1191 | 6.381049  | 5.808426  | 4.60843   | 4.58107   | 2.053525  | 2.533526  | 0.056052795 | -0.916202409 |
| Rattus_norvegici | 3480  | 3722  | 3114 | 4778  | 3218 | 3588 | 6.328309  | 6.585297  | 5.613026  | 6.850239  | 5.936728  | 6.569933  | 0.982388282 | 0.018604184  |
| Rattus_norvegici | 586   | 894   | 558  | 922   | 1147 | 1203 | 8.509329  | 11.595157 | 6.611469  | 10.223073 | 20.60595  | 17.948487 | 0.50688374  | 0.578127232  |
| Rattus_norvegici | 575   | 663   | 885  | 540   | 421  | 546  | 3.614739  | 5.423443  | 7.655665  | 4.004766  | 2.74199   | 4.097082  | 0.51255188  | -0.631797048 |
| Rattus_norvegici | 551   | 714   | 567  | 640   | 558  | 551  | 3.142873  | 3.979325  | 3.232452  | 2.897171  | 3.259369  | 3.191087  | 0.891635385 | -0.199861342 |
| Rattus_norvegici | 485   | 279   | 395  | 98    | 255  | 144  | 5.509117  | 3.133995  | 4.11326   | 1.592274  | 2.917126  | 1.580079  | 0.187783924 | -1.306582609 |
| Rattus_norvegici | 657   | 800   | 768  | 1158  | 1032 | 1190 | 3.640136  | 4.285266  | 4.266958  | 5.088151  | 5.88974   | 6.66358   | 0.586655117 | 0.474734685  |
| Rattus_norvegici | 10023 | 10027 | 9394 | 14264 | 9894 | 9978 | 23.058172 | 19.570808 | 20.991456 | 21.678476 | 20.558804 | 25.180484 | 0.950062423 | 0.06222601   |
| Rattus_norvegici | 108   | 158   | 71   | 72    | 85   | 122  | 1.90629   | 2.89091   | 1.211137  | 1.0073    | 1.475261  | 2.131463  | 0.842972076 | -0.368930771 |
| Rattus_norvegici | 35    | 48    | 26   | 65    | 55   | 69   | 0.821141  | 1.117025  | 0.521871  | 1.206889  | 1.147931  | 1.332931  | 0.652606811 | 0.670509964  |
| Rattus_norvegici | 1233  | 1038  | 981  | 1268  | 886  | 892  | 10.515122 | 8.575679  | 8.762942  | 7.788081  | 7.557029  | 7.369236  | 0.826966158 | -0.245258431 |
| Rattus_norvegici | 102   | 98    | 86   | 136   | 149  | 136  | 0.797428  | 0.746159  | 0.676309  | 0.847378  | 1.194375  | 1.081862  | 0.838712017 | 0.436977159  |
| Rattus_norvegici | 164   | 120   | 81   | 108   | 118  | 66   | 3.014776  | 2.155307  | 1.490514  | 1.572635  | 2.218389  | 1.227428  | 0.820724164 | -0.453479134 |
| Rattus_norvegici | 492   | 518   | 289  | 520   | 339  | 190  | 1.970487  | 2.056906  | 1.179562  | 1.651757  | 1.389758  | 0.781296  | 0.75643102  | -0.477336361 |
| Rattus_norvegici | 376   | 387   | 503  | 77    | 185  | 202  | 1.422494  | 1.42539   | 1.90331   | 0.228471  | 0.993203  | 0.777093  | 0.097662225 | -1.52649718  |
| Rattus_norvegici | 78    | 72    | 69   | 40    | 36   | 0    | 3.163461  | 2.878498  | 2.83801   | 1.17271   | 1.523696  | 0         | 0.093563063 | -1.705935202 |
| Rattus_norvegici | 263   | 287   | 399  | 135   | 113  | 140  | 4.74408   | 5.016215  | 7.153635  | 1.957165  | 2.076006  | 2.54988   | 0.193040171 | -1.424785144 |
| Rattus_norvegici | 414   | 453   | 332  | 480   | 436  | 472  | 1.844329  | 2.178565  | 0.98314   | 1.998648  | 2.253825  | 2.012378  | 0.973880861 | 0.084481529  |
| Rattus_norvegici | 97    | 95    | 92   | 93    | 85   | 86   | 2.479025  | 2.36132   | 2.345906  | 1.889613  | 2.208635  | 2.218347  | 0.920556471 | -0.236508415 |
| Rattus_norvegici | 246   | 285   | 179  | 159   | 96   | 69   | 1.932035  | 2.100028  | 1.266809  | 0.870981  | 0.695488  | 0.486972  | 0.301896117 | -1.300727484 |
| Rattus_norvegici | 124   | 115   | 29   | 221   | 142  | 108  | 1.123211  | 1.018911  | 0.255875  | 1.763346  | 1.546306  | 0.994674  | 0.693090978 | 0.656158378  |
| Rattus_norvegici | 50    | 103   | 82   | 68    | 29   | 40   | 0.689225  | 1.375008  | 1.121644  | 0.73779   | 0.399405  | 0.558282  | 0.500592863 | -0.952800112 |
| Rattus_norvegici | 56    | 118   | 60   | 75    | 51   | 47   | 0.43545   | 0.907674  | 0.4712    | 0.464568  | 0.4077    | 0.375988  | 0.735601548 | -0.584056383 |
| Rattus_norvegici | 62    | 68    | 93   | 48    | 48   | 84   | 0.4897    | 0.528029  | 0.738032  | 0.302213  | 0.38719   | 0.67565   | 0.817894647 | -0.420241298 |
| Rattus_norvegici | 87    | 44    | 12   | 188   | 211  | 138  | 0.674664  | 0.331516  | 0.092685  | 1.157012  | 1.671445  | 1.085457  | 0.120153131 | 1.785960194  |
| Rattus_norvegici | 27    | 23    | 0    | 2891  | 203  | 114  | 0.52518   | 0.443593  | 0         | 45.991474 | 4.155605  | 2.305485  | 0.27623712  | 5.706770006  |
| Rattus_norvegici | 89    | 147   | 75   | 313   | 150  | 353  | 0.601981  | 0.690281  | 0.509913  | 1.380897  | 1.299374  | 1.750579  | 0.307573239 | 1.254587175  |
| Rattus_norvegici | 12    | 71    | 19   | 1     | 91   | 55   | 0.14338   | 0.822224  | 0.217553  | 0.007211  | 1.118512  | 0.668692  | 0.920216928 | 0.517786682  |
| Rattus_norvegici | 765   | 197   | 731  | 517   | 458  | 421  | 4.666053  | 1.248614  | 4.668805  | 2.453687  | 2.922471  | 2.584307  | 0.763073141 | -0.424962668 |
| Rattus_norvegici | 0     | 112   | 71   | 179   | 27   | 113  | 0         | 0.497213  | 0.324685  | 0.648453  | 0.125887  | 0.524751  | 0.777794302 | 0.60894217   |
| Rattus_norvegici | 65    | 51    | 33   | 99    | 76   | 147  | 0.327823  | 0.252494  | 0.163386  | 0.394877  | 0.393077  | 0.755734  | 0.488672419 | 0.994548685  |
| Rattus_norvegici | 27    | 37    | 45   | 33    | 47   | 45   | 0.341446  | 0.514784  | 0.550417  | 0.500455  | 0.873543  | 0.850969  | 0.984602116 | 0.091302552  |
| Rattus_norvegici | 65    | 40    | 498  | 117   | 41   | 93   | 0.293884  | 0.145923  | 2.261922  | 0.479035  | 0.175275  | 0.358331  | 0.739036058 | -1.456560901 |
| Rattus_norvegici | 312   | 366   | 351  | 372   | 335  | 281  | 1.945658  | 2.23801   | 2.198087  | 1.955714  | 2.000246  | 2.028157  | 0.922524379 | -0.196260136 |
| Rattus_norvegici | 4     | 49    | 60   | 48    | 78   | 70   | 0.032304  | 0.502865  | 0.633695  | 0.400398  | 0.844593  | 0.754398  | 0.656436467 | 0.69426545   |
| Rattus_norvegici | 41    | 55    | 74   | 80    | 295  | 128  | 0.254834  | 0.338512  | 0.465457  | 0.402503  | 1.912456  | 0.823553  | 0.419775535 | 1.492881034  |
| Rattus_norvegici | 325   | 274   | 485  | 195   | 167  | 516  | 4.116037  | 2.716392  | 7.061199  | 1.605452  | 1.634381  | 7.635953  | 0.778550429 | -0.407001778 |
| Rattus_norvegici | 30    | 43    | 2    | 108   | 61   | 86   | 0.671306  | 0.950095  | 0.032899  | 1.96817   | 1.432626  | 2.00648   | 0.112913192 | 1.627453633  |
| Rattus_norvegici | 126   | 91    | 89   | 86    | 53   | 74   | 2.426106  | 1.69868   | 1.697266  | 1.311141  | 1.16447   | 1.441667  | 0.692562207 | -0.67136399  |
| Rattus_norvegici | 797   | 570   | 967  | 764   | 358  | 702  | 9.690844  | 6.488209  | 10.12492  | 7.588433  | 3.536391  | 8.23098   | 0.614831033 | -0.515492009 |
| Rattus_norvegici | 85    | 56    | 49   | 69    | 13   | 26   | 1.297342  | 0.833218  | 0.740162  | 0.832218  | 0.198611  | 0.39668   | 0.437281527 | -1.0381872   |
| Rattus_norvegici | 77    | 60    | 84   | 45    | 34   | 55   | 1.894901  | 1.436446  | 2.071709  | 0.887124  | 0.856428  | 1.372462  | 0.536328204 | -0.853621988 |
| Rattus_norvegici | 159   | 92    | 132  | 126   | 31   | 52   | 0.929615  | 0.519486  | 0.767802  | 0.582581  | 0.184658  | 0.30418   | 0.474925384 | -1.089267253 |

|                  |      |       |      |       |      |      |           |            |           |           |           |           |             |              |
|------------------|------|-------|------|-------|------|------|-----------|------------|-----------|-----------|-----------|-----------|-------------|--------------|
| Rattus_norvegici | 177  | 128   | 151  | 138   | 43   | 50   | 1.010818  | 0.709857   | 0.850272  | 0.620414  | 0.251095  | 0.29501   | 0.411143071 | -1.19206486  |
| Rattus_norvegici | 211  | 113   | 274  | 115   | 33   | 96   | 1.056257  | 0.543633   | 1.371122  | 0.452899  | 0.167623  | 0.486933  | 0.24079018  | -1.473549448 |
| Rattus_norvegici | 1147 | 799   | 1204 | 1016  | 818  | 577  | 17.852255 | 12.133504  | 18.734121 | 12.5332   | 13.025076 | 9.101115  | 0.516189531 | -0.541238964 |
| Rattus_norvegici | 280  | 904   | 1062 | 1189  | 1283 | 1663 | 10.924869 | 34.531078  | 41.512386 | 36.880531 | 51.374352 | 66.04258  | 0.341417892 | 0.766206145  |
| Rattus_norvegici | 250  | 934   | 470  | 317   | 525  | 246  | 1.034104  | 3.31071    | 1.871532  | 0.836748  | 1.922794  | 0.895714  | 0.630131799 | -0.704482855 |
| Rattus_norvegici | 565  | 342   | 370  | 759   | 328  | 326  | 2.005682  | 1.649976   | 1.932032  | 2.613388  | 1.183162  | 1.733767  | 1           | -0.044378211 |
| Rattus_norvegici | 34   | 56    | 5    | 16    | 111  | 50   | 0.294991  | 0.481708   | 0.035491  | 0.105647  | 1.001312  | 0.444527  | 0.786752246 | 0.865497878  |
| Rattus_norvegici | 28   | 55    | 40   | 58    | 341  | 41   | 0.138413  | 0.269516   | 0.201695  | 0.233323  | 1.775633  | 0.209476  | 0.651852788 | 1.786326494  |
| Rattus_norvegici | 319  | 367   | 259  | 576   | 699  | 461  | 1.501145  | 1.686421   | 1.217476  | 2.14795   | 3.363767  | 2.199082  | 0.499111974 | 0.757564963  |
| Rattus_norvegici | 6675 | 25518 | 1209 | 15526 | 885  | 911  | 25.543385 | 115.105846 | 5.39478   | 58.275632 | 2.048969  | 5.288535  | 0.797996109 | -1.233423843 |
| Rattus_norvegici | 47   | 35    | 68   | 36    | 23   | 48   | 0.501545  | 0.355629   | 0.724611  | 0.300619  | 0.242412  | 0.519646  | 0.65621262  | -0.623668815 |
| Rattus_norvegici | 157  | 139   | 234  | 264   | 36   | 56   | 1.208976  | 1.080991   | 2.006234  | 1.687106  | 0.335882  | 0.459947  | 0.657396879 | -0.83659681  |
| Rattus_norvegici | 56   | 71    | 95   | 45    | 11   | 19   | 0.933148  | 1.1582     | 1.591525  | 0.590267  | 0.177175  | 0.309687  | 0.083770331 | -1.779754082 |
| Rattus_norvegici | 113  | 104   | 102  | 88    | 69   | 82   | 2.768319  | 2.517493   | 2.607174  | 1.725859  | 1.722899  | 2.060724  | 0.762844883 | -0.553449081 |
| Rattus_norvegici | 868  | 842   | 781  | 1085  | 758  | 862  | 4.060713  | 3.84455    | 3.652094  | 4.025035  | 3.626472  | 4.092949  | 0.991136006 | -0.027394947 |
| Rattus_norvegici | 43   | 139   | 90   | 110   | 42   | 28   | 0.380291  | 0.719407   | 0.454575  | 0.660998  | 0.209138  | 0.141696  | 0.636168781 | -0.801609246 |
| Rattus_norvegici | 507  | 348   | 309  | 582   | 503  | 288  | 1.536225  | 1.736127   | 0.933528  | 2.450048  | 1.560051  | 1.839033  | 0.965255603 | 0.087452709  |
| Rattus_norvegici | 56   | 40    | 30   | 55    | 46   | 48   | 0.861493  | 0.596271   | 0.453484  | 0.672485  | 0.719734  | 0.754136  | 0.970555041 | 0.107196669  |
| Rattus_norvegici | 240  | 1906  | 78   | 182   | 41   | 83   | 1.127261  | 5.566886   | 0.329923  | 0.464395  | 0.111952  | 0.333141  | 0.537298476 | -3.04510331  |
| Rattus_norvegici | 1299 | 1531  | 1825 | 2028  | 1757 | 1584 | 35.329166 | 40.627659  | 49.609337 | 43.735546 | 48.905426 | 43.723995 | 0.958955057 | 0.065290013  |
| Rattus_norvegici | 145  | 232   | 184  | 277   | 212  | 304  | 3.163805  | 4.969042   | 3.687148  | 4.622511  | 4.707472  | 6.42185   | 0.856027809 | 0.370179026  |
| Rattus_norvegici | 46   | 100   | 68   | 122   | 84   | 83   | 0.643343  | 1.365935   | 0.948799  | 1.352746  | 1.204055  | 1.179978  | 0.898249598 | 0.285469487  |
| Rattus_norvegici | 104  | 308   | 402  | 57    | 32   | 62   | 1.314851  | 3.674863   | 3.552193  | 0.524389  | 0.446339  | 0.895364  | 0.034171516 | -2.575166239 |
| Rattus_norvegici | 246  | 247   | 278  | 196   | 48   | 12   | 2.030309  | 2.253069   | 2.707769  | 1.354652  | 1.013859  | 0.451541  | 0.116086835 | -1.854112185 |
| Rattus_norvegici | 369  | 4     | 102  | 92    | 0    | 0    | 1.147586  | 0.009461   | 0.316304  | 0.226475  | 0         | 0         | 0.53821978  | -2.72160266  |
| Rattus_norvegici | 1365 | 1261  | 2084 | 1106  | 535  | 526  | 10.503611 | 9.469254   | 16.027082 | 7.041594  | 4.210087  | 4.105946  | 0.018121071 | -1.306024173 |
| Rattus_norvegici | 200  | 100   | 20   | 211   | 162  | 130  | 2.428164  | 1.177265   | 0.241146  | 2.027869  | 2.007486  | 1.594093  | 0.790154287 | 0.507881764  |
| Rattus_norvegici | 74   | 41    | 242  | 120   | 20   | 5    | 0.811055  | 0.39321    | 3.126803  | 0.95181   | 0.20459   | 0.036605  | 0.616491357 | -1.60056919  |
| Rattus_norvegici | 2533 | 9871  | 4194 | 12908 | 3084 | 3857 | 22.713463 | 69.206636  | 37.287667 | 75.067897 | 27.270659 | 38.865528 | 0.972592817 | 0.042647011  |
| Rattus_norvegici | 101  | 103   | 29   | 197   | 271  | 273  | 0.515082  | 0.511818   | 0.144355  | 0.796607  | 1.418114  | 1.414825  | 0.189601572 | 1.573495656  |
| Rattus_norvegici | 271  | 1035  | 1844 | 3537  | 2093 | 1044 | 1.499475  | 5.603152   | 10.221916 | 15.558465 | 11.879102 | 5.875464  | 0.464604098 | 0.891213538  |
| Rattus_norvegici | 333  | 348   | 257  | 939   | 111  | 183  | 10.917603 | 11.121444  | 8.41793   | 24.399891 | 3.710092  | 6.085468  | 0.937596198 | 0.133585725  |
| Rattus_norvegici | 115  | 138   | 84   | 124   | 87   | 121  | 7.642636  | 8.941749   | 5.563133  | 6.529001  | 5.887396  | 8.123241  | 0.954060745 | -0.155949769 |
| Rattus_norvegici | 441  | 440   | 425  | 590   | 424  | 447  | 12.565769 | 12.230531  | 12.109015 | 13.332879 | 12.370133 | 12.935362 | 0.993939542 | 0.01459475   |
| Rattus_norvegici | 105  | 93    | 59   | 137   | 61   | 67   | 7.070582  | 6.091821   | 3.954777  | 7.299017  | 4.213486  | 4.579913  | 0.973689426 | -0.135184194 |
| Rattus_norvegici | 461  | 545   | 491  | 507   | 492  | 534  | 12.615033 | 14.563621  | 13.159831 | 11.800299 | 13.638672 | 14.744395 | 0.958865081 | -0.089679069 |
| Rattus_norvegici | 248  | 275   | 274  | 151   | 151  | 195  | 0.448217  | 0.484075   | 0.494183  | 0.215356  | 0.278842  | 0.357572  | 0.560220596 | -0.79897101  |
| Rattus_norvegici | 100  | 6     | 34   | 40    | 393  | 256  | 2.053738  | 0.101755   | 0.680806  | 0.551052  | 8.035615  | 5.295454  | 0.306803776 | 2.250443526  |
| Rattus_norvegici | 231  | 298   | 273  | 885   | 559  | 982  | 0.685808  | 0.863542   | 0.811435  | 2.113791  | 2.222395  | 3.121976  | 0.050260838 | 1.460446405  |
| Rattus_norvegici | 182  | 204   | 266  | 124   | 128  | 147  | 12.418649 | 13.536712  | 18.116655 | 6.712243  | 8.893097  | 10.180907 | 0.563575861 | -0.830560243 |
| Rattus_norvegici | 387  | 465   | 404  | 92    | 72   | 148  | 2.756324  | 2.951764   | 2.937509  | 0.456538  | 0.674199  | 0.880028  | 0.017683706 | -2.124692226 |
| Rattus_norvegici | 266  | 225   | 427  | 123   | 155  | 157  | 1.047493  | 0.863214   | 1.679956  | 0.383057  | 0.624302  | 0.627357  | 0.295786828 | -1.19435103  |
| Rattus_norvegici | 955  | 986   | 429  | 598   | 37   | 54   | 3.941701  | 4.083737   | 2.761458  | 2.172852  | 0.512256  | 0.24816   | 0.048900685 | -2.074915878 |
| Rattus_norvegici | 165  | 93    | 1904 | 0     | 7    | 0    | 1.378837  | 0.748325   | 11.382038 | 0         | 0.029596  | 0         | 0.133848423 | -8.310306115 |
| Rattus_norvegici | 143  | 157   | 215  | 72    | 54   | 69   | 1.961675  | 2.106133   | 2.950423  | 0.786891  | 0.75775   | 0.959584  | 0.200663934 | -1.54202153  |
| Rattus_norvegici | 304  | 211   | 383  | 214   | 395  | 284  | 0.789948  | 0.536194   | 0.994894  | 0.441414  | 1.050457  | 0.748154  | 0.949974281 | -0.109554247 |
| Rattus_norvegici | 211  | 319   | 193  | 177   | 177  | 179  | 4.9667    | 6.861444   | 4.664576  | 3.629782  | 3.983391  | 4.082805  | 0.725556546 | -0.559610632 |
| Rattus_norvegici | 1378 | 1304  | 1497 | 1407  | 926  | 1083 | 2.696652  | 2.489214   | 2.926121  | 2.183267  | 1.853579  | 2.149767  | 0.561946307 | -0.44271328  |
| Rattus_norvegici | 276  | 397   | 223  | 525   | 771  | 758  | 6.669993  | 10.216255  | 6.004868  | 11.116435 | 21.484754 | 21.281949 | 0.227515919 | 1.101023326  |
| Rattus_norvegici | 143  | 241   | 133  | 240   | 287  | 219  | 1.731168  | 3.150717   | 2.031766  | 3.081297  | 3.42728   | 2.199507  | 0.839943244 | 0.414794748  |
| Rattus_norvegici | 76   | 53    | 77   | 194   | 24   | 68   | 0.427034  | 0.290463   | 0.435298  | 1.089604  | 0.138615  | 0.393611  | 0.890374375 | 0.23224016   |

|                  |      |      |       |       |       |       |           |           |           |           |           |            |             |              |
|------------------|------|------|-------|-------|-------|-------|-----------|-----------|-----------|-----------|-----------|------------|-------------|--------------|
| Rattus_norvegici | 283  | 68   | 18    | 348   | 156   | 0     | 3.222771  | 0.751037  | 0.197301  | 3.148729  | 1.822073  | 0          | 0.948040737 | 0.217678803  |
| Rattus_norvegici | 238  | 200  | 176   | 63    | 43    | 70    | 2.545046  | 2.089141  | 1.874336  | 0.535159  | 0.469323  | 0.753001   | 0.0780196   | -1.936818847 |
| Rattus_norvegici | 38   | 97   | 49    | 29    | 39    | 77    | 0.672466  | 1.355556  | 1.015664  | 0.305791  | 0.527318  | 1.127892   | 0.784344199 | -0.423889811 |
| Rattus_norvegici | 181  | 201  | 127   | 63    | 19    | 32    | 1.174332  | 1.335336  | 0.721211  | 0.410068  | 0.137975  | 0.241461   | 0.028825435 | -2.350123642 |
| Rattus_norvegici | 121  | 101  | 125   | 65    | 101   | 48    | 0.721834  | 0.586466  | 0.742265  | 0.305613  | 0.614729  | 0.285069   | 0.587541364 | -0.812834785 |
| Rattus_norvegici | 59   | 83   | 62    | 63    | 80    | 141   | 0.653006  | 1.148585  | 0.699814  | 0.653758  | 0.829903  | 1.397683   | 0.874931721 | 0.386011505  |
| Rattus_norvegici | 904  | 1064 | 1665  | 2045  | 1102  | 537   | 4.838391  | 4.911775  | 10.694047 | 10.869682 | 6.180729  | 3.920738   | 0.946278422 | -0.177698218 |
| Rattus_norvegici | 52   | 73   | 120   | 88    | 3     | 3     | 1.002409  | 1.36998   | 2.311057  | 1.344732  | 0.039846  | 0.039513   | 0.295335459 | -1.710558375 |
| Rattus_norvegici | 15   | 26   | 5     | 100   | 50    | 64    | 0.241246  | 0.429157  | 0.083533  | 1.356573  | 0.862367  | 1.112373   | 0.016453033 | 2.063975141  |
| Rattus_norvegici | 219  | 405  | 209   | 69    | 84    | 75    | 0.804385  | 1.452833  | 0.767349  | 0.200054  | 0.315123  | 0.276779   | 0.053152052 | -1.977502279 |
| Rattus_norvegici | 428  | 2    | 14    | 652   | 10    | 423   | 9.650982  | 0.023595  | 0.192441  | 7.418646  | 0.146809  | 7.012763   | 0.72948144  | 1.070928683  |
| Rattus_norvegici | 81   | 77   | 28    | 81    | 10    | 10    | 1.002226  | 0.918696  | 0.308638  | 0.733947  | 0.113502  | 0.106523   | 0.53118726  | -1.149827114 |
| Rattus_norvegici | 139  | 133  | 520   | 347   | 240   | 263   | 1.590078  | 1.256327  | 3.653916  | 2.487427  | 1.884534  | 1.928109   | 0.991894    | -0.061550589 |
| Rattus_norvegici | 253  | 147  | 298   | 109   | 94    | 71    | 1.649983  | 0.934878  | 1.941215  | 0.560485  | 0.626735  | 0.469624   | 0.205812525 | -1.500136413 |
| Rattus_norvegici | 147  | 55   | 169   | 31    | 14    | 76    | 0.520135  | 0.1869    | 0.597476  | 0.084779  | 0.047411  | 0.269935   | 0.124470333 | -1.734868562 |
| Rattus_norvegici | 80   | 85   | 214   | 75    | 24    | 13    | 1.171329  | 1.318145  | 3.292687  | 0.814     | 0.328795  | 0.218828   | 0.190952371 | -1.999731521 |
| Rattus_norvegici | 1451 | 1231 | 1459  | 1076  | 955   | 1001  | 7.386529  | 6.101746  | 7.598696  | 3.925813  | 4.007438  | 4.734989   | 0.371956703 | -0.583865055 |
| Rattus_norvegici | 82   | 93   | 152   | 8     | 25    | 35    | 0.676298  | 0.865401  | 1.264353  | 0.022575  | 0.099951  | 0.136604   | 0.014614851 | -2.333853353 |
| Rattus_norvegici | 449  | 123  | 590   | 140   | 42    | 99    | 1.765843  | 0.480305  | 2.61321   | 0.485909  | 0.173514  | 0.444413   | 0.118509243 | -2.240190865 |
| Rattus_norvegici | 2905 | 3173 | 2541  | 3865  | 2646  | 2654  | 27.208035 | 32.36304  | 26.593586 | 32.060523 | 28.3858   | 28.104425  | 0.964241181 | -0.06205273  |
| Rattus_norvegici | 685  | 709  | 685   | 845   | 612   | 570   | 16.397331 | 16.56653  | 16.387747 | 16.039232 | 14.982753 | 13.831056  | 0.904207334 | -0.187290955 |
| Rattus_norvegici | 1542 | 1626 | 1352  | 1981  | 1272  | 1502  | 20.156025 | 20.734449 | 17.663441 | 20.534981 | 17.011194 | 19.913874  | 0.958955057 | -0.076996251 |
| Rattus_norvegici | 148  | 121  | 97    | 183   | 147   | 92    | 5.272397  | 4.201233  | 3.462948  | 5.188149  | 5.361789  | 3.320044   | 0.983258887 | 0.052305342  |
| Rattus_norvegici | 244  | 582  | 108   | 29    | 17    | 10    | 2.660192  | 6.193481  | 1.17387   | 0.243872  | 0.188389  | 0.099872   | 0.033391211 | -4.225474885 |
| Rattus_norvegici | 246  | 166  | 203   | 176   | 106   | 87    | 2.219059  | 1.728032  | 1.786016  | 1.323222  | 1.217255  | 1.091456   | 0.551386074 | -0.908576495 |
| Rattus_norvegici | 702  | 589  | 439   | 1299  | 835   | 823   | 2.070021  | 2.853319  | 1.561353  | 3.537991  | 3.656112  | 3.125798   | 0.448535835 | 0.61745206   |
| Rattus_norvegici | 234  | 458  | 389   | 385   | 105   | 108   | 4.284353  | 8.446076  | 7.552059  | 5.676154  | 2.110574  | 2.08261    | 0.398488639 | -1.075764366 |
| Rattus_norvegici | 9812 | 8403 | 8509  | 18084 | 8297  | 8239  | 45.155988 | 37.455029 | 39.218761 | 64.401993 | 38.162471 | 37.689496  | 0.775807235 | 0.188618623  |
| Rattus_norvegici | 89   | 39   | 9     | 184   | 490   | 936   | 0.666205  | 0.285833  | 0.062142  | 1.098116  | 3.786769  | 7.1742     | 0.06725039  | 3.496972865  |
| Rattus_norvegici | 39   | 99   | 45    | 20    | 34    | 49    | 0.176391  | 0.442026  | 0.202501  | 0.072158  | 0.155916  | 0.227349   | 0.429962678 | -0.905171481 |
| Rattus_norvegici | 48   | 28   | 4     | 86    | 506   | 1799  | 0.089861  | 0.052007  | 0.007563  | 0.130122  | 1.34757   | 4.732862   | 0.190420384 | 4.865806375  |
| Rattus_norvegici | 122  | 53   | 136   | 179   | 146   | 279   | 0.933006  | 0.39734   | 1.044719  | 1.091372  | 1.147119  | 2.171803   | 0.593720699 | 0.832051132  |
| Rattus_norvegici | 592  | 215  | 1551  | 13    | 126   | 349   | 12.943989 | 4.585542  | 34.081816 | 0.185052  | 2.603951  | 7.715161   | 0.314953413 | -2.329985436 |
| Rattus_norvegici | 96   | 73   | 102   | 11    | 18    | 41    | 2.767308  | 2.048766  | 2.964138  | 0.232469  | 0.520069  | 1.18948    | 0.032565486 | -2.033049231 |
| Rattus_norvegici | 55   | 147  | 11    | 79    | 18    | 52    | 0.718578  | 1.880966  | 0.13613   | 0.820674  | 0.239814  | 0.681789   | 0.827740296 | -0.685782069 |
| Rattus_norvegici | 7360 | 5281 | 11060 | 4328  | 1582  | 2224  | 65.642601 | 45.95406  | 98.573494 | 30.601999 | 14.434012 | 20.115955  | 0.019802484 | -1.739152386 |
| Rattus_norvegici | 3852 | 4503 | 3719  | 4222  | 3120  | 4437  | 4.930047  | 5.314857  | 4.832724  | 3.448057  | 4.116047  | 5.819417   | 0.828992189 | -0.168416903 |
| Rattus_norvegici | 133  | 147  | 82    | 193   | 417   | 300   | 0.626435  | 0.673829  | 0.528295  | 0.717925  | 3.426437  | 1.849995   | 0.319898674 | 1.247993646  |
| Rattus_norvegici | 104  | 67   | 85    | 288   | 77    | 398   | 0.632234  | 0.394624  | 0.515158  | 1.404254  | 0.485612  | 2.482882   | 0.33614493  | 1.428377036  |
| Rattus_norvegici | 86   | 36   | 76    | 33    | 59    | 40    | 0.968099  | 0.430102  | 0.82823   | 0.345344  | 0.79355   | 0.499586   | 0.622122582 | -0.689951963 |
| Rattus_norvegici | 31   | 50   | 52    | 58    | 25    | 16    | 0.305336  | 0.488435  | 0.519206  | 0.456497  | 0.248301  | 0.15431    | 0.682912626 | -0.629827192 |
| Rattus_norvegici | 153  | 108  | 138   | 174   | 57    | 66    | 0.709834  | 0.582268  | 0.677512  | 0.711329  | 0.293343  | 0.346956   | 0.758371563 | -0.633855751 |
| Rattus_norvegici | 100  | 87   | 103   | 135   | 86    | 139   | 0.812747  | 1.195798  | 0.840502  | 1.199205  | 0.718759  | 1.146961   | 0.950181416 | 0.169849636  |
| Rattus_norvegici | 148  | 166  | 536   | 25    | 3     | 13    | 1.266632  | 1.26761   | 4.401589  | 0.132448  | 0.014096  | 0.100999   | 0.031485592 | -4.602775588 |
| Rattus_norvegici | 105  | 276  | 78    | 92    | 375   | 111   | 0.484478  | 1.24715   | 0.358036  | 0.337799  | 1.778538  | 0.521683   | 0.958955057 | 0.278792394  |
| Rattus_norvegici | 9630 | 1781 | 298   | 15405 | 26748 | 39335 | 21.714824 | 3.918271  | 0.644118  | 26.434633 | 59.220238 | 195.049345 | 0.019400085 | 2.717189755  |
| Rattus_norvegici | 33   | 71   | 0     | 104   | 79    | 83    | 0.154601  | 0.33121   | 0         | 0.39521   | 0.386616  | 0.404502   | 0.306758654 | 1.232516457  |
| Rattus_norvegici | 1199 | 496  | 341   | 1190  | 716   | 355   | 1.482775  | 0.826658  | 0.495141  | 1.138643  | 1.187791  | 0.584465   | 0.999283451 | -0.030989999 |
| Rattus_norvegici | 84   | 12   | 83    | 51    | 21    | 130   | 0.730002  | 0.092064  | 0.708272  | 0.35063   | 0.182158  | 1.15803    | 0.995073688 | 0.053743312  |
| Rattus_norvegici | 13   | 48   | 0     | 422   | 47    | 67    | 0.145579  | 0.568228  | 0         | 4.111745  | 0.587992  | 0.818183   | 0.362289527 | 2.887939938  |
| Rattus_norvegici | 2012 | 1583 | 3147  | 1537  | 989   | 996   | 9.025542  | 6.704434  | 13.9942   | 5.464425  | 4.710802  | 4.432991   | 0.100665085 | -1.101306607 |

|                  |     |     |      |     |     |     |          |          |           |          |          |          |             |              |
|------------------|-----|-----|------|-----|-----|-----|----------|----------|-----------|----------|----------|----------|-------------|--------------|
| Rattus_norvegici | 788 | 500 | 1221 | 633 | 525 | 446 | 7.797502 | 4.822972 | 12.070768 | 4.964584 | 5.304987 | 4.476683 | 0.362427231 | -0.798018473 |
| Rattus_norvegici | 141 | 143 | 580  | 15  | 3   | 4   | 0.40032  | 0.465993 | 1.846764  | 0.026709 | 0.004923 | 0.009261 | 0.034894615 | -5.547433729 |
